## ISARIC COVID-19 Clinical Data Report issued: 27 March 2022

*International Severe Acute Respiratory and emerging Infections Consortium*

ISARIC Clinical Characterisation Group\*, J. Kenneth Baillie, Joaquin Baruch, Abigail Beane, Lucille Blumberg, Fernando Augusto Bozza, Tessa Broadley, Aidan Burrell, Gail Carson, Barbara Wanjiru Citarella, Jake Dunning, Loubna Elotmani, Noelia Garcia Barrio, Jean-Christophe Goffard, Bronner Goncalves, Matthew Hall, Madiha Hashmi, Peter Horby, Waasila Jassat, Christiana Kartsonaki, Bharath Kumar Tirupakuzhi Vijayaraghavan, Pavan Kumar Vecham, Cedric Laouenan, Samantha Lissauer, Ignacio Martin-Loeches, France Mentre, Ben Morton, Daniel Munblit, Nikita A. Nekliudov, Alistair Nichol, David S.Y. Ong, Prasan Kumar Panda, Miguel Pedrera Jimenez, Michelle Petrovic, Nagarajan Ramakrishnan, Grazielle Viana Ramos, Claire Roger, Amanda Rojek, Oana Sandulescu, Malcolm G. Semple, Pratima Sharma, Sally Shrapnel, Louise Sigfrid, Benedict Sim Lim Heng, Budha Charan Singh, Emily Somers, Anca Streinu-Cercel, Fabio S. Taccone, Jia Wei, Evert-Jan Wils, Xin Ci Wong, Kyle Young, Piero L. Olliaro, Laura Merson^

\*group members, participating institutions and funders are listed at end of the report

^Correspondence to: [Laura.Merson@ndm.ox.ac.uk](mailto:Laura.Merson@ndm.ox.ac.uk), ISARIC, Pandemic Sciences Institute, Nuffield Department of Medicine, University of Oxford, Oxford, UK

### Abstract

ISARIC (International Severe Acute Respiratory and emerging Infections Consortium) partnerships and outbreak preparedness initiatives enabled the rapid launch of standardised clinical data collection on COVID-19 in Jan 2020. Extensive global participation has resulted in a large, standardised collection of comprehensive clinical data from hundreds of sites across dozens of countries. Data are analysed regularly and reported publicly to inform patient care and public health response. This report, our 17th report, is a part of a series published over the past 2 years. Data have been entered for 800,459 individuals from 1701 partner institutions and networks across 60 countries.

The comprehensive analyses detailed in this report includes hospitalised individuals of all ages for whom data collection occurred between 30 January 2020 and up to and including 5 January 2022, AND who have laboratory-confirmed SARS-COV-2 infection or clinically diagnosed COVID-19.

For the 699,014 cases who meet eligibility criteria for this report, selected findings include:

- median age of 58 years, with an approximately equal (50/50) male:female sex distribution
- 29% of the cohort are at least 70 years of age, whereas 4% are 0-19 years of age
- the most common symptom combination in this hospitalised cohort is shortness of breath, cough, and history of fever, which has remained constant over time
- the five most common symptoms at admission were shortness of breath, cough, history of fever, fatigue/malaise, and altered consciousness/confusion, which is unchanged from the previous reports
- age-associated differences in symptoms are evident, including the frequency of altered consciousness increasing with age, and fever, respiratory and constitutional symptoms being present mostly in those 40 years and above
- 16% of patients with relevant data available were admitted at some point during their illness into an intensive care unit (ICU), which is slightly lower than previously reported (19%)
- antibiotic agents were used in 35% of patients for whom relevant data are available (669,630), a significant reduction from our previous reports (80%) which reflects a shifting proportion of data contributed by different institutions; in ICU/HDU admitted patients with data available (50,560), 91% received antibiotics
- use of corticosteroids was reported in 24% of all patients for whom data were available (677,012); in ICU/HDU admitted patients with data available (50,646), 69% received corticosteroids
- outcomes are known for 632,518 patients and the overall estimated case fatality ratio (CFR) is 23.9% (95%CI 23.8-24.1), rising to 37.1% (95%CI 36.8-37.4) for patients who were admitted to ICU/HDU, demonstrating worse outcomes in those with the most severe disease

To access previous versions of **ISARIC COVID-19 Clinical Data Report** please use the link below:

[NOTE: This preprint reports new research that has not been certified by peer review and should not be used to guide clinical practice.](#)

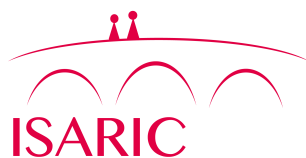

# ISARIC (International Severe Acute Respiratory and Emerging Infections Consortium)

*A global federation of clinical research networks, providing a proficient, coordinated, and agile research response to outbreak-prone infectious diseases*

## Background

This report describes the clinical presentation, treatment and outcome of a cohort of over 800,000 patients with COVID-19 hospitalised between January 2020 and January 2022 in 60 countries. This has been possible thanks to 1701 institutions and their clinical teams contributing to ISARIC (International Severe Acute Respiratory and Emerging Infection Consortium), a grassroots collaboration <https://isaric.org/>.

After over 458 million cases and over 6 million deaths, COVID-19 is clearly showing us how pandemics disrupt populations by stretching healthcare systems, and shaking economies. Although clinicians and well-equipped surveillance systems can adapt to health emergencies by implementing new treatments and information systems, clinical research lacks this agility.

**The advantages of an international standardised case record form.** Novel diseases are, by definition, new; the scientific method is not. By developing consensus on a road map for clinical research methods before a pandemic, we are able to minimise further time defining study types, data collection tools, and potential outputs for evidence summarisation once the pathogen emerges. Using slightly adjusted standardised methods for novel diseases, evidence can be generated quickly.

While small observational studies are easy to conduct, they often record different data or may record variables in different ways. This may not allow data to be collated or findings to be compared across studies, or combined to produce a more powerful and accurate representation. In contrast, large international observational studies with a standardised form allow for international data comparisons, improved analytic control of confounders, and therefore enable the acquisition of high levels of evidence.

**How we got here with ISARIC.** In 2013, ISARIC and the World Health Organisation (WHO) implemented the standardised Clinical Characterisation Protocol to evolve clinical data into research evidence during health emergencies.

In January 2020, we launched our case report form when only 846 COVID-19 cases had been reported globally. The first patient was enrolled on 30 January 2020. Today, our partners have collected standardised, in-hospital clinical data from over 800,000 patients, in 1701 sites, across 60 countries. More than half of these patients live in low- and middle-income countries. This partner-fueled initiative is to our knowledge the largest COVID-19 in-hospital international database in the world.

In this report, we present the current state of our database, which all our collaborators can access by submitting a statistical analysis plan to our clinical team. We encourage our collaborators to test their research hypothesis within the framework of ISARIC’s collaborative Partner Analysis scheme [2]. The majority of this database is additionally available to external researchers via application to our Data Access Committee at <https://www.iddo.org/covid19/data-sharing/accessing-data>.

These analyses are available on the ISARIC COVID-19 Dashboard at <https://livedataoxford.shinyapps.io/CovidClinicalDataDashboard/>

To contribute, please contact [ncov@isaric.org](mailto:ncov@isaric.org).

## Methods

The results in this report are produced using data from the ISARIC COVID-19 database of international, prospective observational data on clinical features of patients admitted to hospital with COVID-19. Data collection was structured on the ISARIC/WHO Clinical Characterisation Protocol for Severe Emerging Infections, a standardized protocol for investigation of severe acute infections by pathogens of public health interest [3] and the ISARIC case report forms [4] designed for standardized data collection from the start of an outbreak and rapid dissemination of clinical information [5-9]. Data are collected on Research electronic Data Capture (REDCap, version 8.11.11, Vanderbilt University, Nashville, Tenn.), hosted by the University of Oxford. Additional data, collected using a wide variety of data systems, are submitted by international investigators who are not using the University of Oxford REDCap instance. Data are curated by the Infectious Diseases Data Observatory [10] to the CDISC Study Data Tabulation Model (SDTM) for harmonised analysis [11].

SDTM formatted data are processed in R 4.1.0 [12]. Initial data cleaning includes custom scripts designed to identify results of laboratory SARS-CoV-2 testing, and to standardise nomenclature for comorbidities, symptoms at admission, treatments, and outcomes.

Patients are excluded if they did not have laboratory or clinically confirmed SARS-CoV-2 infection. Patients are considered to be lost to follow up if either a) they were transferred to another facility, or b) they had an unknown outcome and the last date upon which any data was recorded for them was 45 days or before the date of data extraction. Patients with unknown outcome where the last recorded data was less than 45 days old are instead categorised as receiving ongoing care.

Comorbidities, symptoms at admission, and treatments (in both the full population and the intensive care unit (ICU)/high dependency unit (HDU) population) are included in the report only if at least 10% of patients have their presence or absence recorded. Laboratory and vital sign measurements that fall within the top 2.5% and bottom 2.5% of values, within both the <10 year age group and the  $\geq 10$  year age group, are taken to be likely mis-entered and changed to missing for this report. Similarly, variables for time durations are converted to missing if their values are either negative or in the top 2.5% of values. Dates are converted to missing where they are before the 1st January 2020 (except for dates of birth and hospital admission) or after the date of data extraction.

The following COVID-19 symptom definitions were used:

- WHO:
  1. A combination of acute fever and cough,  
Or
  2. A combination of three or more of: fever, cough, general weakness and fatigue, headache, myalgia (we used muscle aches, joint pain), sore throat, coryza (we used runny nose), dyspnoea (we used shortness of breath), anorexia, nausea and vomiting, diarrhoea, altered mental status (we used altered consciousness or confusion)
- Centers for Disease Control (CDC), United States:
  1. At least two of: fever, chills (not available), rigors (not available), myalgia, headache, sore throat,

new olfactory and taste disorder,

Or

2. At least one of: cough, shortness of breath, difficulty breathing (not available)

- Public Health England

New cough (we used cough), or temperature  $\geq 37.8^{\circ}\text{C}$  (we used history of fever), or a loss or change in sense of smell or taste

- European Centre for Disease Prevention and Control

At least one of: cough, fever, shortness of breath, sudden onset anosmia, ageusia or dysgeusia

Data manipulation is performed using the tidyverse collection of packages [13], as well as ff [14] and dtplyr [15]. Data visualisation makes use of ggplot [16] and its extension ggupset [17]. The report is generated using knitr [18].

This report only includes individuals for whom data collection commenced on or before 05 January 2022.

# Results

The flow chart (Figure 1) gives an overview of the cohort and outcomes as of 05 January 2022.

Figure 1: Overview of cohort and outcomes as of 05 January 2022.

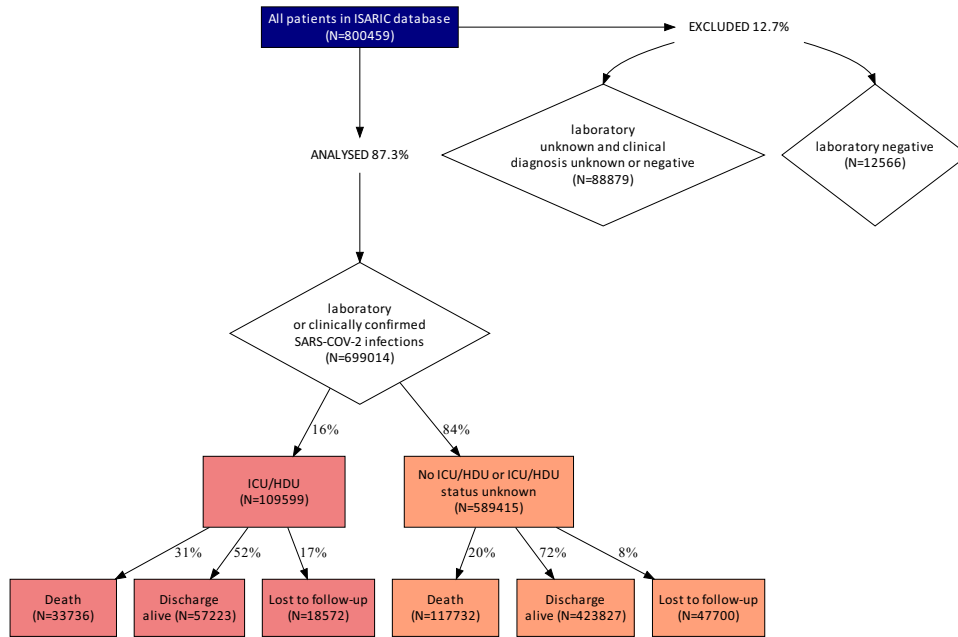

Data have been contributed by 1701 sites in 60 countries (see Figure 2). 470876 (58.8%) of the patients are from low- and middle-income and 329579 (41.2%) from high-income countries. The two largest contributors to the database are South Africa (54%) and the UK (34.1%). Plots grouped by regions and calendar time are shown in Figure 3 and 4. The cohort satisfying the inclusion criteria has **699014** cases.

Figure 2: Distribution of patients by country

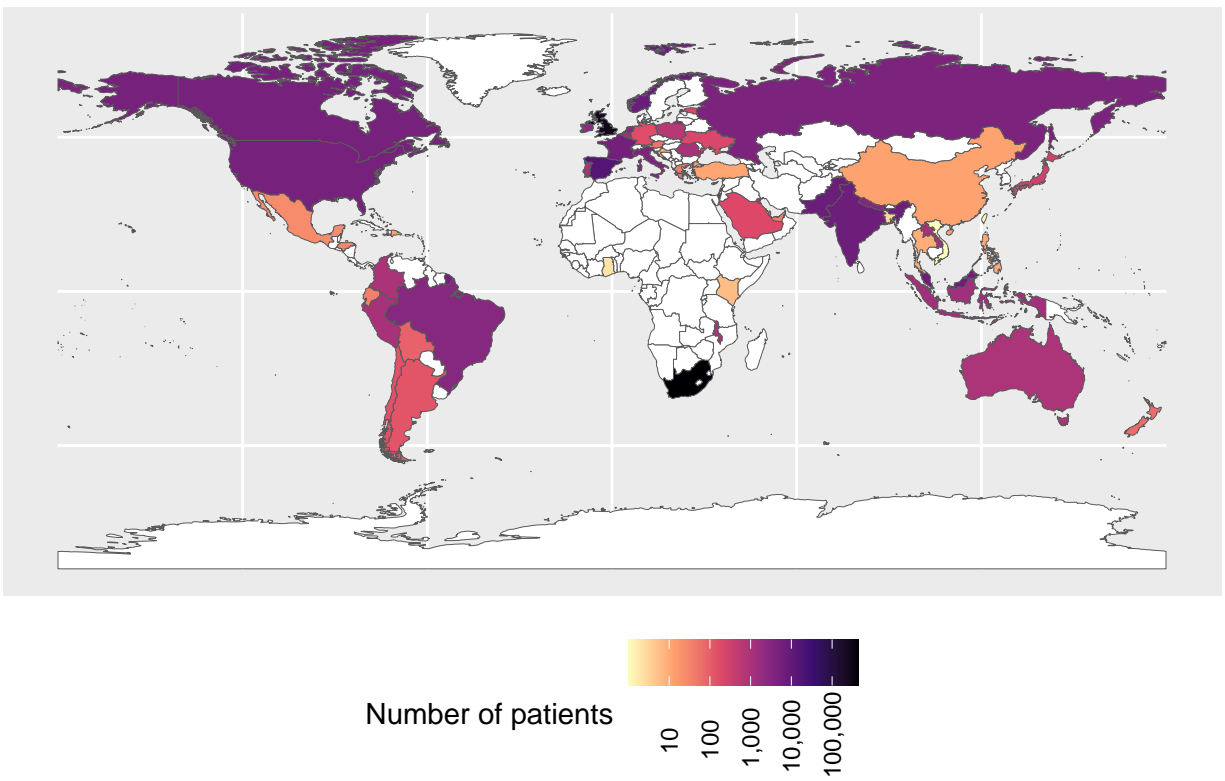



Figure 4: Distribution of patients by world bank region and time

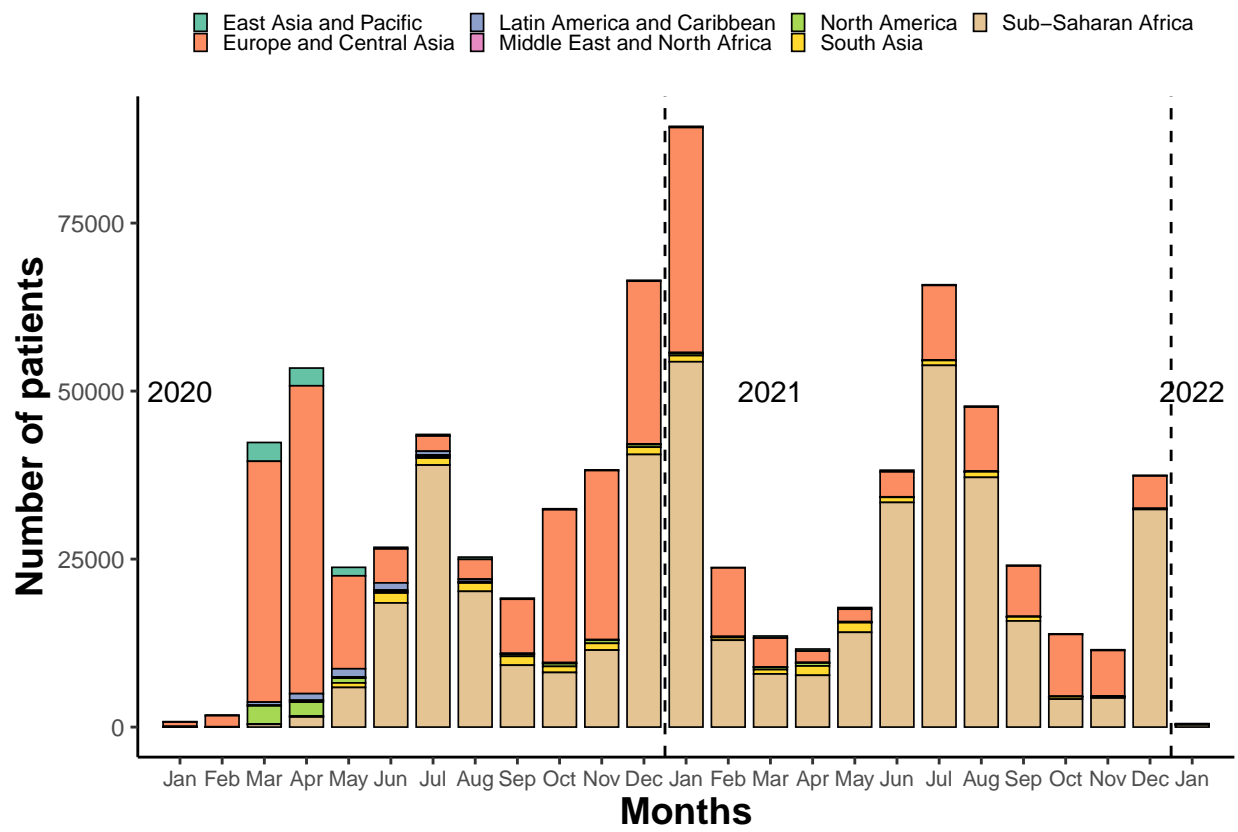



## Demographics

Of these 699014 cases, 344372 (49.3%) are males and 353789 (50.6%) are females. Sex is unreported for 853 cases. The median age is 58 years, ranging from 0 to 119 years. One-third of the patients are 70 years old and above. Demographics, including age, sex, and outcome, are presented in Table 1 and Figure 5.

Table 1: Patient Characteristics. Proportions are presented in parentheses, and have been rounded to two decimal places.

| Variable          | Count (proportion) |
|-------------------|--------------------|
| Size of cohort    | 699014             |
| By sex            |                    |
| Female            | 353789 (0.51)      |
| Male              | 344372 (0.49)      |
| Unknown           | 853 (0)            |
| By outcome status |                    |
| Death             | 151468 (0.22)      |
| Discharge         | 481050 (0.69)      |
| LTFU              | 66272 (0.09)       |
| Ongoing care      | 224 (0)            |
| By age group      |                    |
| 0-9               | 15522 (0.02)       |
| 10-19             | 15635 (0.02)       |
| 20-29             | 42947 (0.06)       |
| 30-39             | 76545 (0.11)       |
| 40-49             | 92948 (0.13)       |
| 50-59             | 127055 (0.18)      |
| 60-69             | 119445 (0.17)      |
| 70+               | 200120 (0.29)      |

### Presenting symptoms

The observed mean number of days from (first) symptom onset to hospital admission was 3, with a standard deviation (SD) of 4.1 days and a median of 1 days.

A detailed analysis of patients' symptoms has been reported in a previous publication [19]. The prevalence of symptoms on admission to the hospital is summarised in Table 3 and Figure 6a. (Note that South Africa did not collect symptoms data. The overall frequency of missing data outside South Africa is 11%). The five most common symptoms at admission are shortness of breath, cough, history of fever, fatigue/malaise, and altered consciousness/confusion, accounting for 60.8%, 58.5%, 56.7%, 38.6%, 18.6% of patients with at least one symptom recorded.

Clusters of symptoms are presented in Figure 6b and 6c. The most common symptom combination is shortness of breath, cough, and history of fever.

Figure 5: Age and sex distribution of patients. Bar fills are outcome (death/discharge/lost to follow-up (LTFU)) at the time of report.

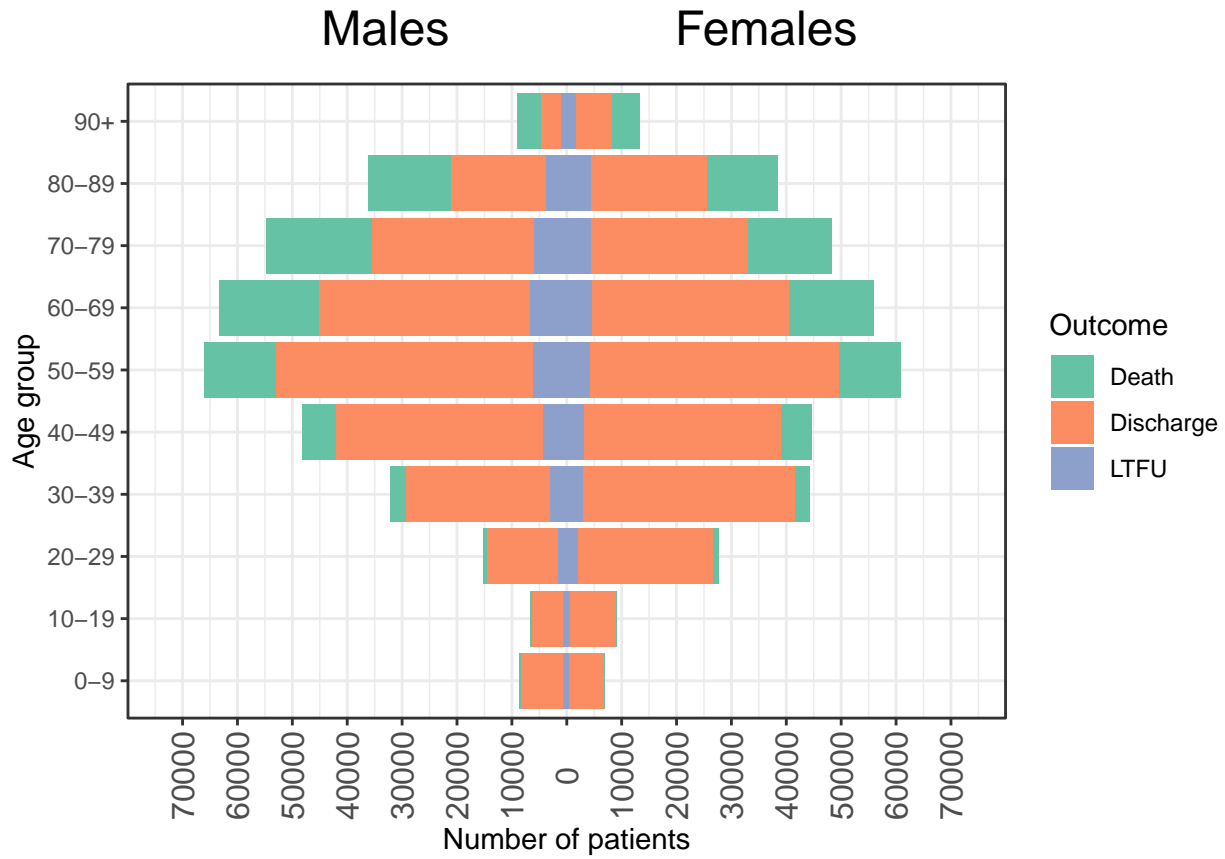

Table 2: Outcome by age and sex. Proportions are calculated using the row total as the denominator.

| Variable   | Death        | Discharge     | LTFU         | Case fatality ratio |
|------------|--------------|---------------|--------------|---------------------|
| <b>Age</b> |              |               |              |                     |
| 0-9        | 402 (0.03)   | 14083 (0.91)  | 1037 (0.07)  | 0.03                |
| 10-19      | 409 (0.03)   | 14020 (0.9)   | 1205 (0.08)  | 0.03                |
| 20-29      | 1792 (0.04)  | 37613 (0.88)  | 3536 (0.08)  | 0.05                |
| 30-39      | 5731 (0.07)  | 64820 (0.85)  | 5960 (0.08)  | 0.08                |
| 40-49      | 11836 (0.13) | 73626 (0.79)  | 7439 (0.08)  | 0.14                |
| 50-59      | 24441 (0.19) | 92161 (0.73)  | 10389 (0.08) | 0.21                |
| 60-69      | 33849 (0.28) | 74304 (0.62)  | 11246 (0.09) | 0.31                |
| 70+        | 72116 (0.36) | 106947 (0.53) | 21031 (0.11) | 0.4                 |
| <b>Sex</b> |              |               |              |                     |
| Female     | 70171 (0.2)  | 252838 (0.71) | 30674 (0.09) | 0.22                |
| Male       | 81144 (0.24) | 227773 (0.66) | 35337 (0.1)  | 0.26                |

Figure 6: Clinical symptoms of patients at admission

(a) Frequency of symptoms seen at admission amongst COVID-19 patients. Bars are annotated with a fraction representing the number of patients presenting with this symptom over the number of patients for whom presence or absence of this symptom was recorded.

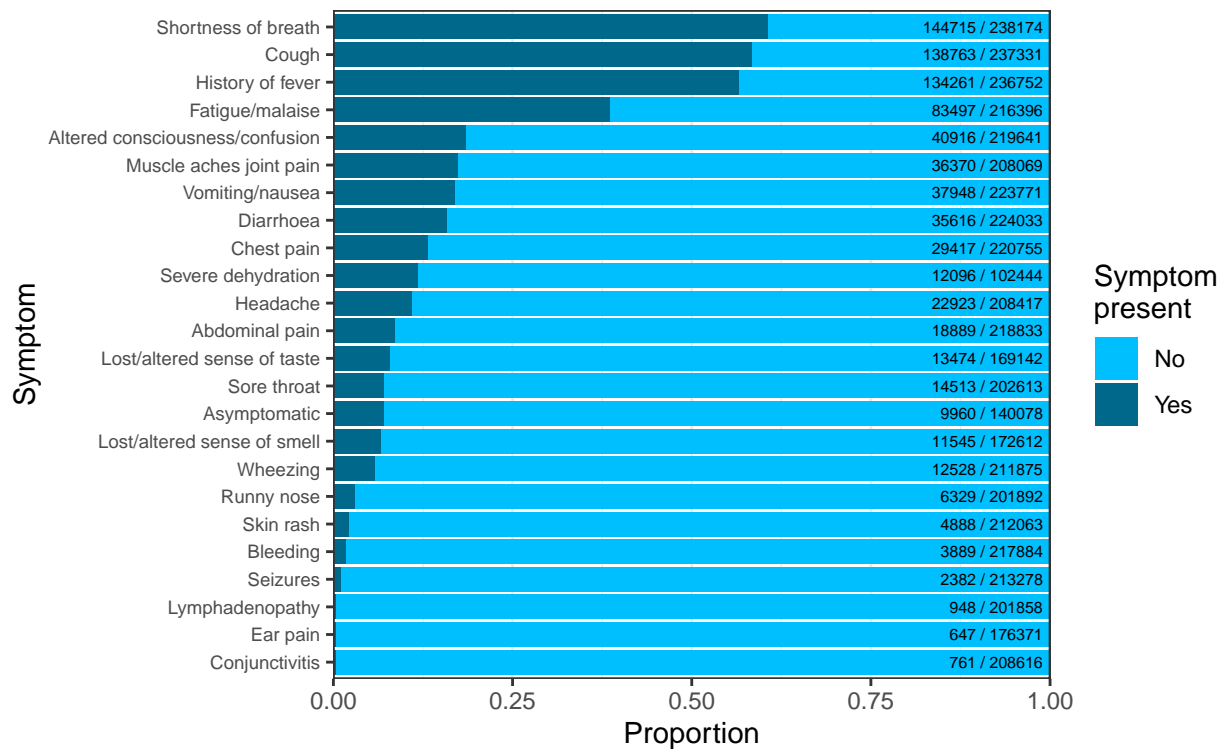

Table 3: Prevalence of symptoms.

| Symptoms                        | Present       | Absent        | Unknown       |
|---------------------------------|---------------|---------------|---------------|
| Shortness of breath             | 144715 (0.21) | 93459 (0.13)  | 460840 (0.66) |
| Cough                           | 138763 (0.2)  | 98568 (0.14)  | 461683 (0.66) |
| History of fever                | 134261 (0.19) | 102491 (0.15) | 462262 (0.66) |
| Fatigue/malaise                 | 83497 (0.12)  | 132899 (0.19) | 482618 (0.69) |
| Altered consciousness/confusion | 40916 (0.06)  | 178725 (0.26) | 479373 (0.69) |
| Vomiting/nausea                 | 37948 (0.05)  | 185823 (0.27) | 475243 (0.68) |
| Muscle aches joint pain         | 36370 (0.05)  | 171699 (0.25) | 490945 (0.7)  |
| Diarrhoea                       | 35616 (0.05)  | 188417 (0.27) | 474981 (0.68) |
| Chest pain                      | 29417 (0.04)  | 191338 (0.27) | 478259 (0.68) |
| Headache                        | 22923 (0.03)  | 185494 (0.27) | 490597 (0.7)  |
| Abdominal pain                  | 18889 (0.03)  | 199944 (0.29) | 480181 (0.69) |
| Sore throat                     | 14513 (0.02)  | 188100 (0.27) | 496401 (0.71) |
| Lost/altered sense of taste     | 13474 (0.02)  | 155668 (0.22) | 529872 (0.76) |
| Wheezing                        | 12528 (0.02)  | 199347 (0.29) | 487139 (0.7)  |
| Severe dehydration              | 12096 (0.02)  | 90348 (0.13)  | 596570 (0.85) |
| Lost/altered sense of smell     | 11545 (0.02)  | 161067 (0.23) | 526402 (0.75) |
| Asymptomatic                    | 9960 (0.01)   | 130118 (0.19) | 558936 (0.8)  |
| Runny nose                      | 6329 (0.01)   | 195563 (0.28) | 497122 (0.71) |
| Skin rash                       | 4888 (0.01)   | 207175 (0.3)  | 486951 (0.7)  |
| Bleeding                        | 3889 (0.01)   | 213995 (0.31) | 481130 (0.69) |
| Seizures                        | 2382 (0)      | 210896 (0.3)  | 485736 (0.69) |
| Lymphadenopathy                 | 948 (0)       | 200910 (0.29) | 497156 (0.71) |
| Conjunctivitis                  | 761 (0)       | 207855 (0.3)  | 490398 (0.7)  |
| Ear pain                        | 647 (0)       | 175724 (0.25) | 522643 (0.75) |

(b) The distribution of combinations of the five most common symptoms, amongst all patients for whom these data were recorded. Filled and empty circles below the x-axis indicate the presence or absence of each comorbidity.

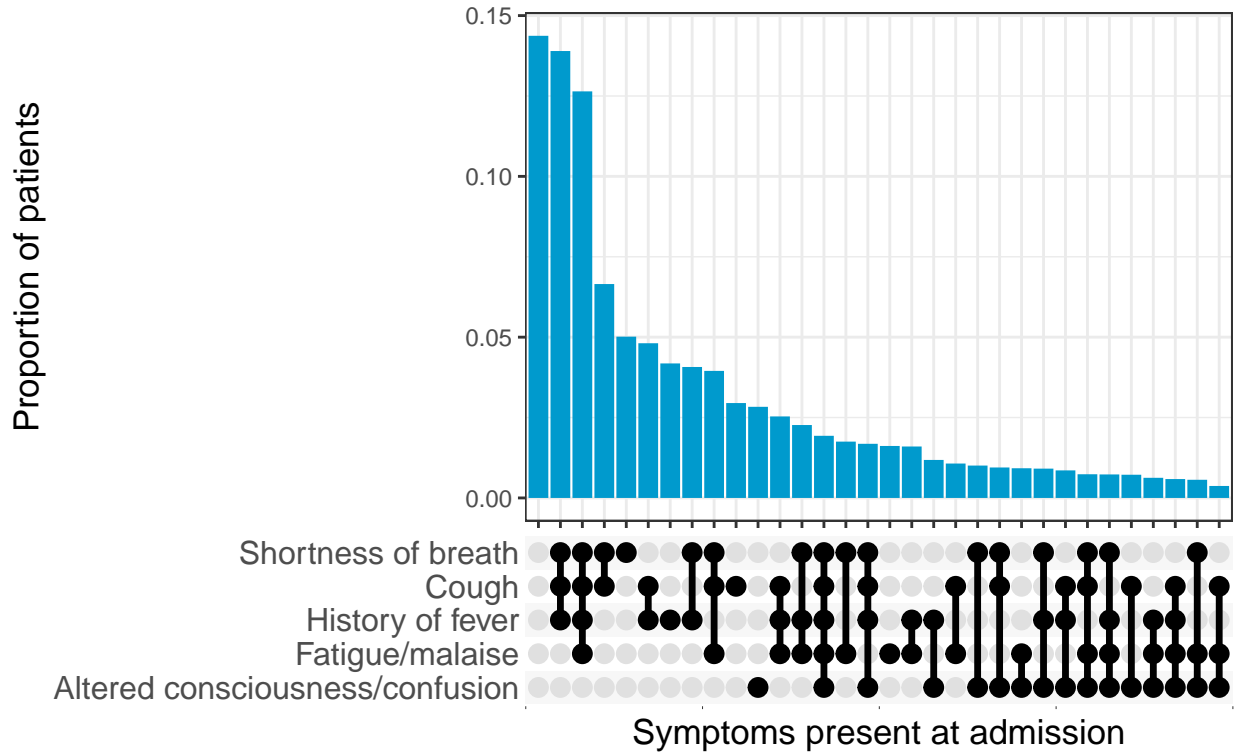

The observed symptoms on admission partly represent case definitions and policies for hospital admission, which may change as time passes. The overall percentages of patients meeting the four most common case definitions were 77%, 84%, 77%, 61% for CDC, ECDC, PHE, and WHO, respectively, and varies by age (Figure 7).

(c) Heatmap for correlation between symptoms. Fill colour is the phi correlation coefficient for each pair of symptoms, calculated amongst patients with recorded presence or absence of both.

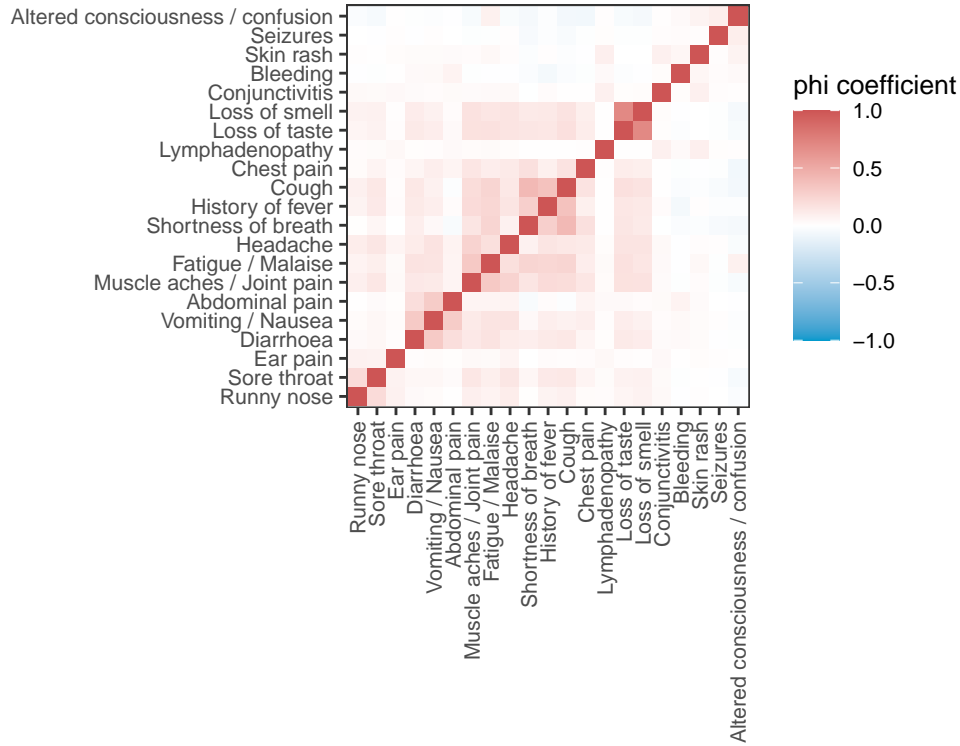

The frequency of presenting symptoms varies with age (Figure 8). Altered consciousness increases with age. The proportions of fever, respiratory and constitutional symptoms are higher in patients aged 40-60. Cough or fever were also common in children aged 0-9. The proportion of abdominal pain, diarrhoea, and vomiting are less age-dependent and similar across age groups.

Figure 7: Proportion of patients that meet the 4 most common COVID-19 symptom case definitions by age

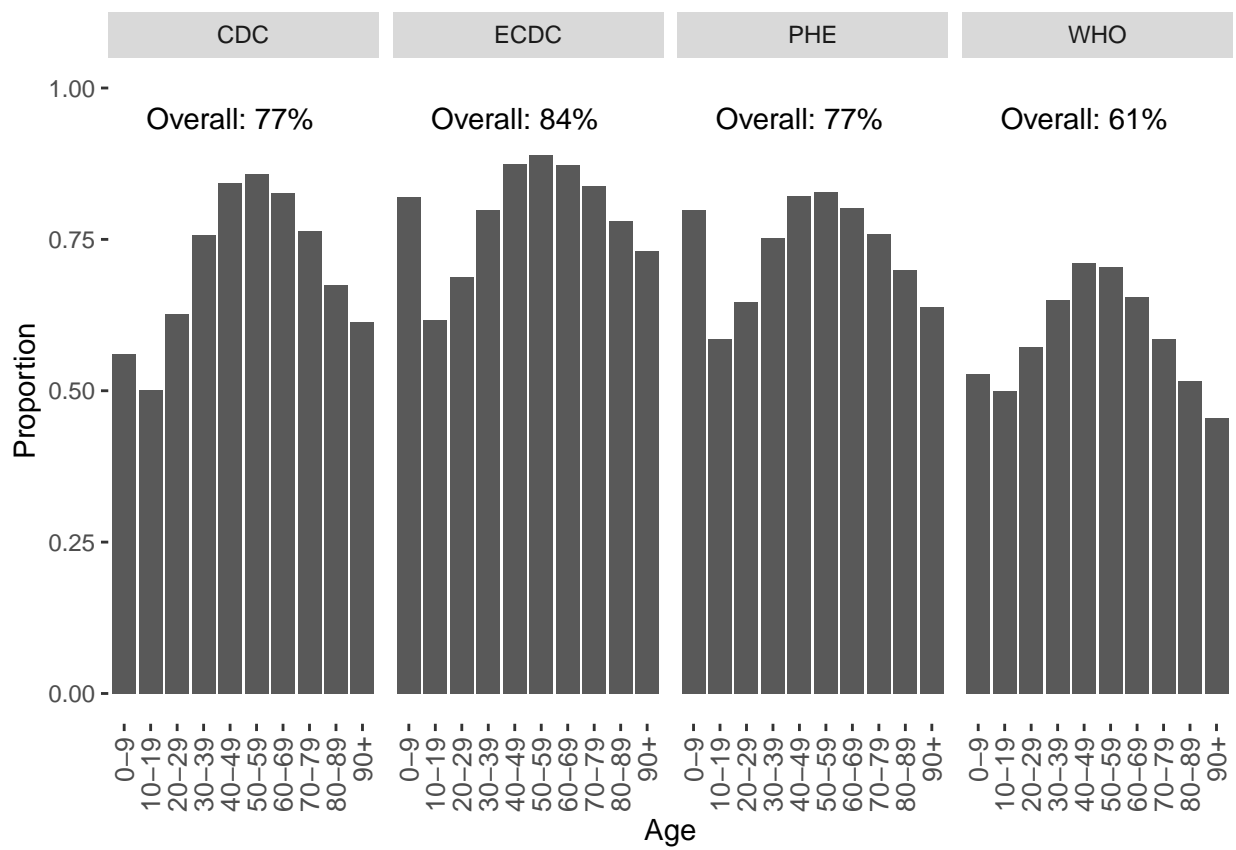



Figure 8: Symptoms recorded at hospital presentation stratified by age group. Boxes show the proportion of individuals with each symptom. The size of each box is proportional to the number of individuals represented. N is the number of individuals included in the plot (this varies between plots due to data completeness. The numbers for panel c, e, f, i were patients who had informaton on at least one symptom).

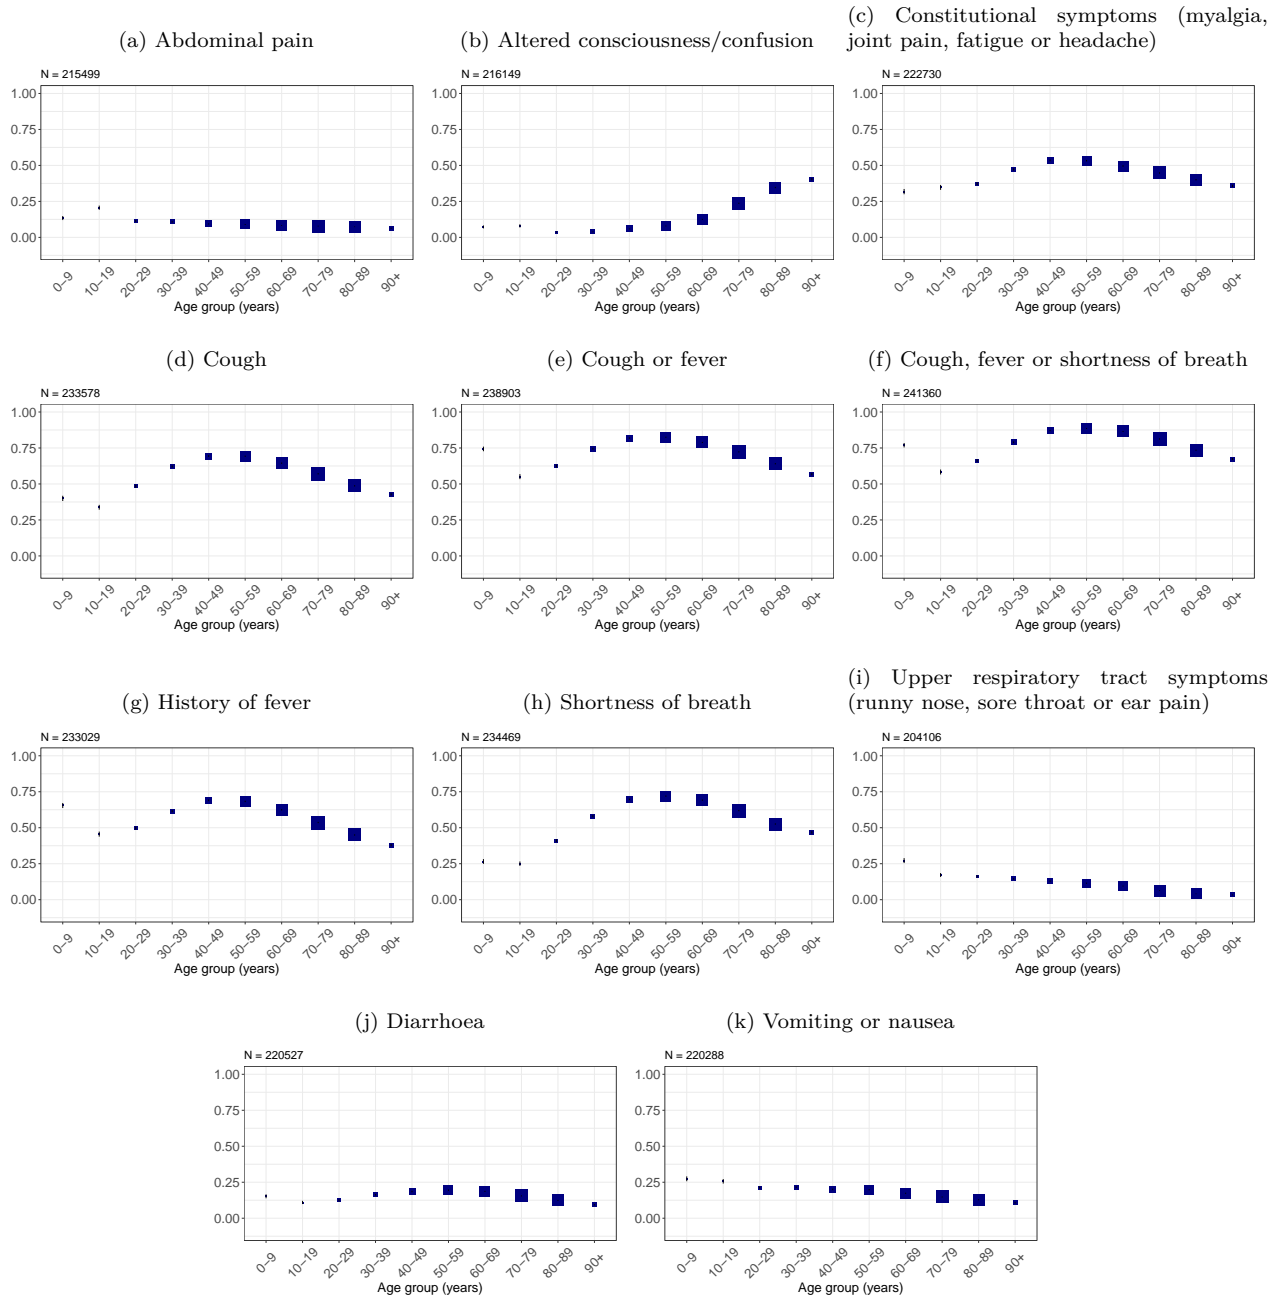

In Figure 9, we present the frequencies of most common symptoms varied by regions. Each panel corresponds to a different region, and within region, symptoms that were present more often correspond to higher y-axis coordinates. To improve visualization, transparency decreases with increasing frequency. Across all geographical regions, shortness of breath, fever, and cough are the three symptoms with the highest prevalence.

Figure 9: Symptoms recorded at hospital presentation stratified by region. The numbers next to each bar represent patients presented with this symptom/patients recorded. The N in the title represents the total number of patients in each region, including those with or without symptoms recorded.

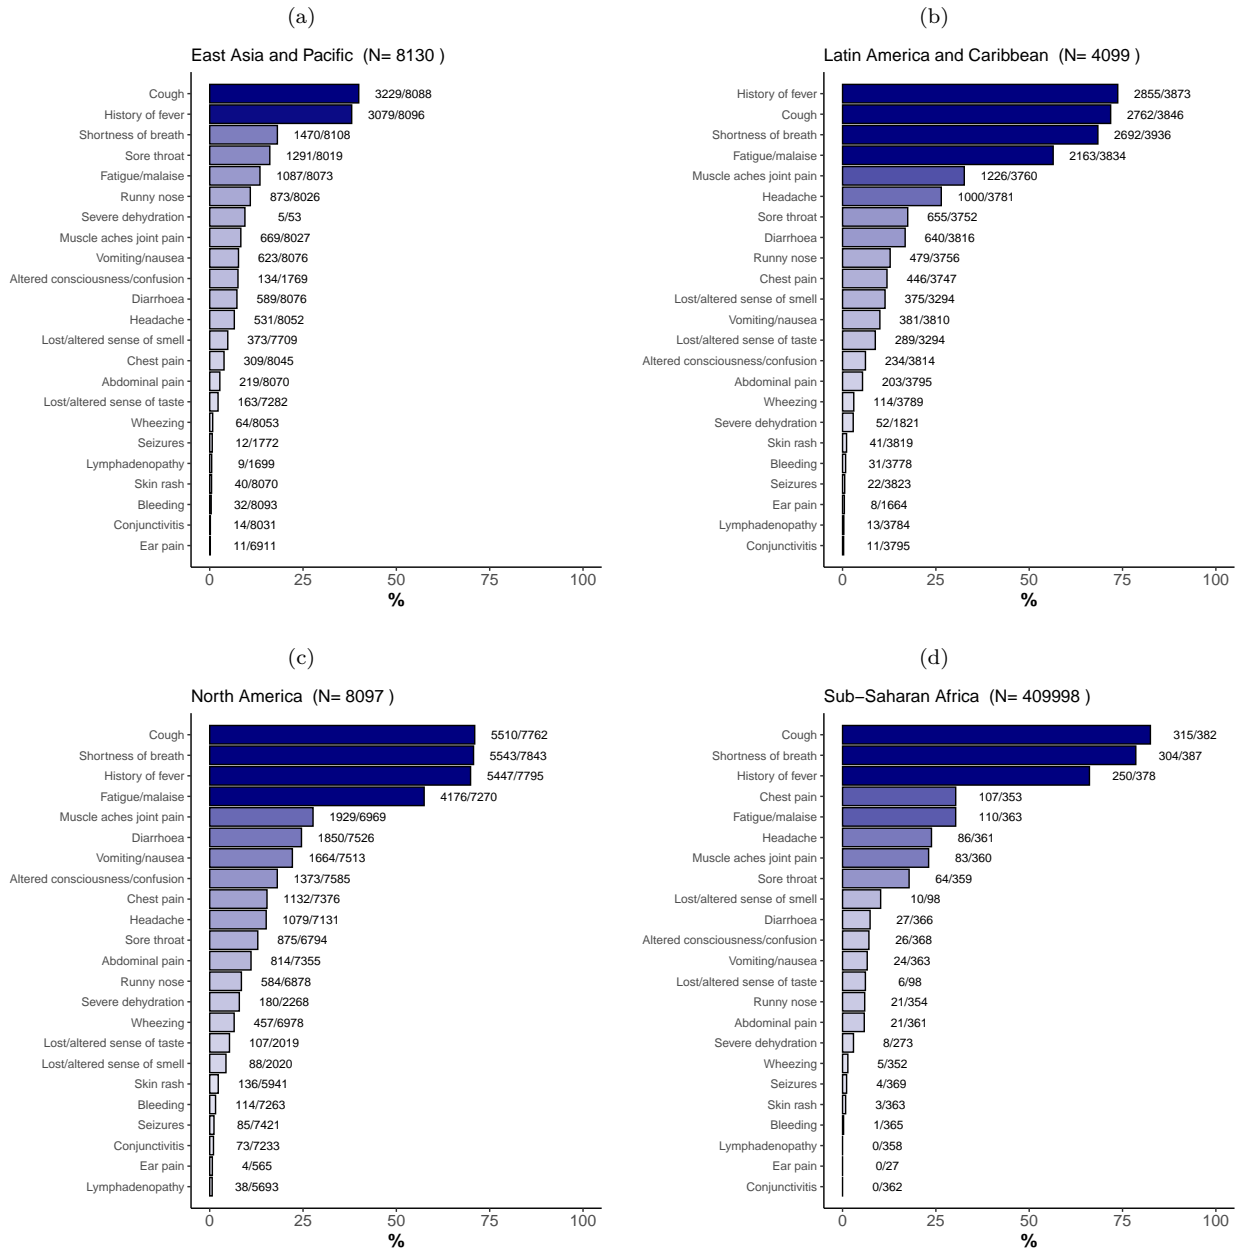

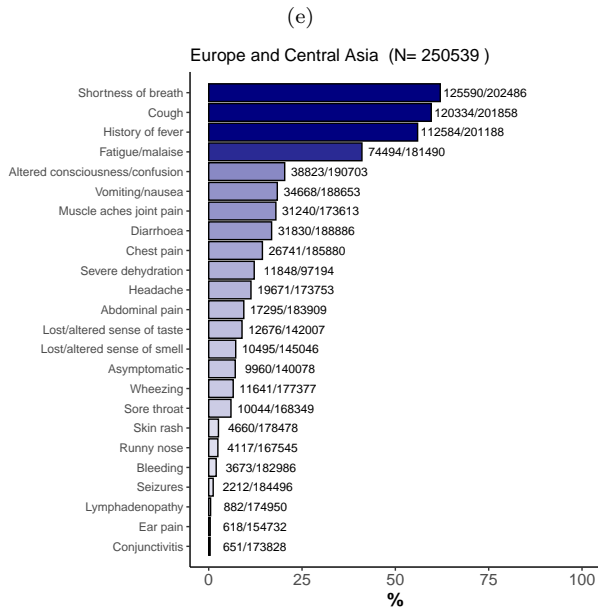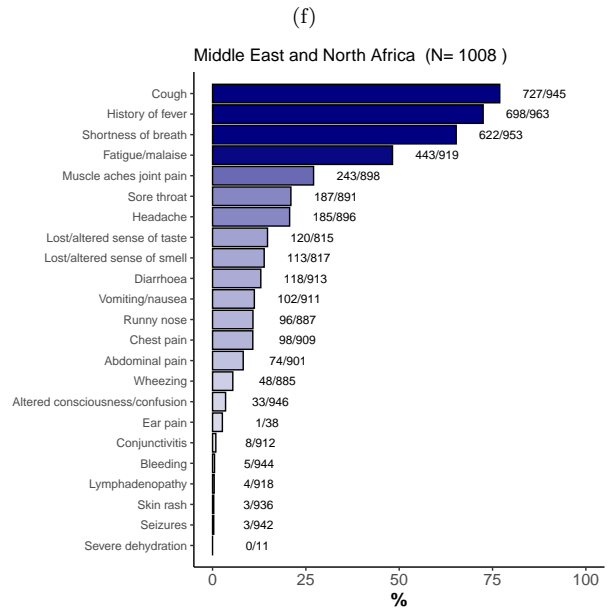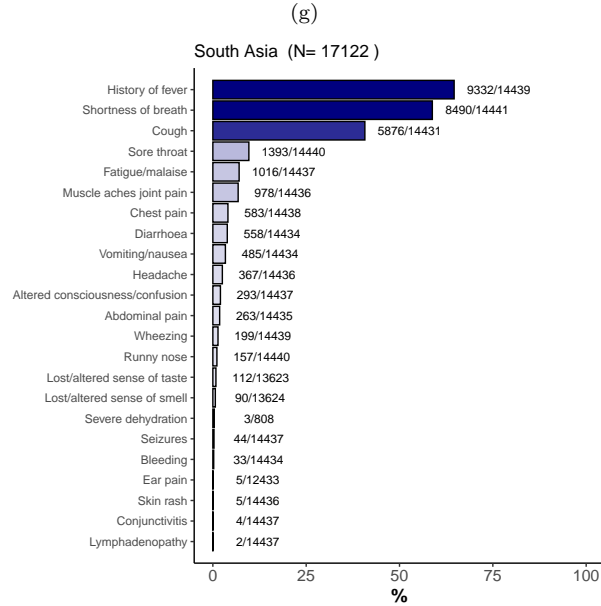

Table 4: Prevalence of comorbidities.

| Comorbidities                                 | Present      | Absent        | Unknown       |
|-----------------------------------------------|--------------|---------------|---------------|
| Hypertension                                  | 210890 (0.3) | 320592 (0.46) | 167532 (0.24) |
| Diabetes                                      | 143120 (0.2) | 404646 (0.58) | 151248 (0.22) |
| Chronic cardiac disease                       | 71819 (0.1)  | 463113 (0.66) | 164082 (0.23) |
| Smoking                                       | 66149 (0.09) | 139210 (0.2)  | 493655 (0.71) |
| Obesity                                       | 48608 (0.07) | 263053 (0.38) | 387353 (0.55) |
| Asthma                                        | 47285 (0.07) | 487761 (0.7)  | 163968 (0.23) |
| Chronic pulmonary disease                     | 46780 (0.07) | 485758 (0.69) | 166476 (0.24) |
| Chronic kidney disease                        | 41862 (0.06) | 486467 (0.7)  | 170685 (0.24) |
| HIV/AIDS                                      | 26813 (0.04) | 496784 (0.71) | 175417 (0.25) |
| Chronic neurological disorder                 | 25557 (0.04) | 225518 (0.32) | 447939 (0.64) |
| Malignant neoplasm                            | 25103 (0.04) | 505635 (0.72) | 168276 (0.24) |
| Rheumatologic disorder                        | 25072 (0.04) | 218865 (0.31) | 455077 (0.65) |
| Dementia                                      | 24324 (0.03) | 220212 (0.32) | 454478 (0.65) |
| Pregnancy                                     | 18773 (0.03) | 252612 (0.36) | 82593 (0.12)  |
| Other                                         | 14849 (0.02) | 435251 (0.62) | 248914 (0.36) |
| Tuberculosis                                  | 11392 (0.02) | 317078 (0.45) | 370544 (0.53) |
| Chronic haematological disease                | 9236 (0.01)  | 234589 (0.34) | 455189 (0.65) |
| Liver disease                                 | 8003 (0.01)  | 252552 (0.36) | 438459 (0.63) |
| Malnutrition                                  | 4797 (0.01)  | 226291 (0.32) | 467926 (0.67) |
| Immunosuppression                             | 4536 (0.01)  | 119491 (0.17) | 574987 (0.82) |
| Transplantation                               | 1640 (0)     | 122729 (0.18) | 574645 (0.82) |
| Rare diseases and inborn errors of metabolism | 641 (0)      | 123016 (0.18) | 575357 (0.82) |

### Comorbidities and other concomitant conditions at admission

Information is available on at least 75% of cases for diabetes, chronic pulmonary disease, chronic kidney disease, asthma, malignant neoplasm, cardiac chronic disease, HIV/AIDS, and hypertension (Table 4). Conditions present in at least 10% of cases are hypertension (30% of those reported), diabetes (20%), chronic cardiac disease (10%) (Figure 10a). Combinations of the five most prevalent conditions are presented in Figure 10b.

Figure 10: Comorbidities and other concomitant conditions

(a) Frequency of comorbidities or other concomitant conditions seen at admission amongst COVID-19 patients. Bars are annotated with a fraction representing the number of patients presenting with this comorbidity over the number of patients for whom presence or absence of this comorbidity was recorded.

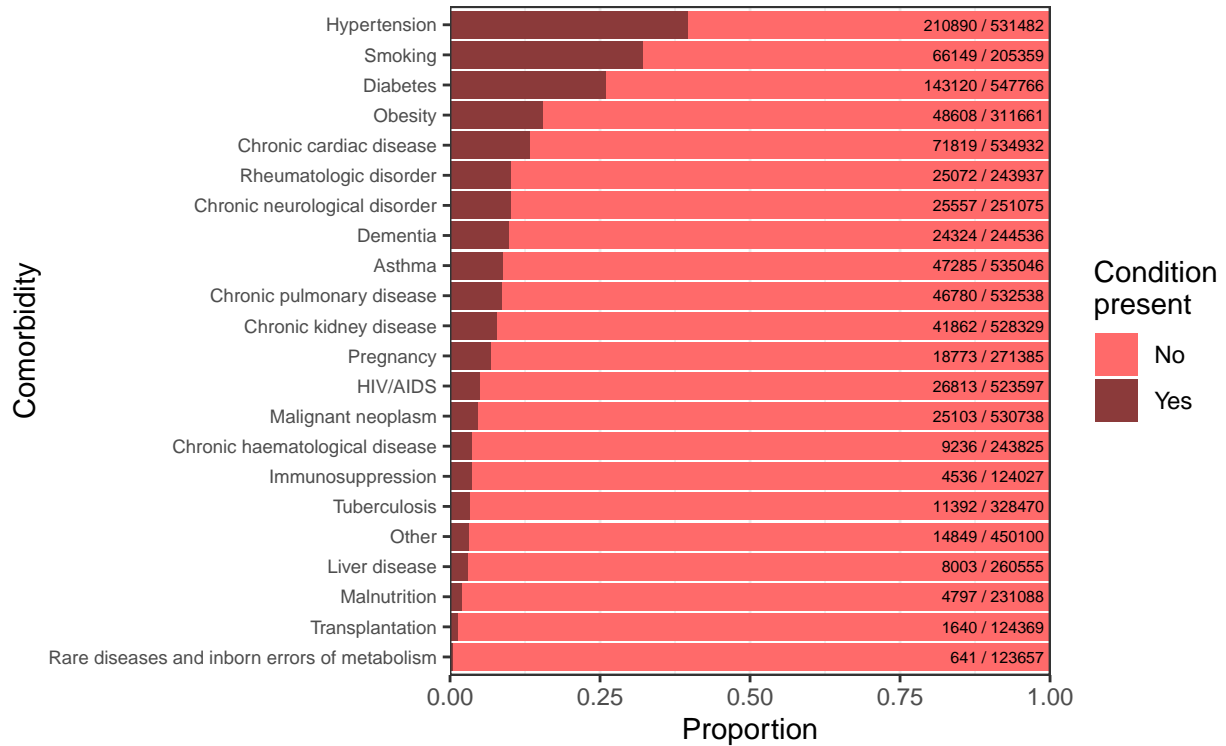

(b) The distribution of combinations of the five most common such conditions, amongst all patients for whom these data were recorded. Filled and empty circles below the x-axis indicate the presence or absence of each comorbidity.

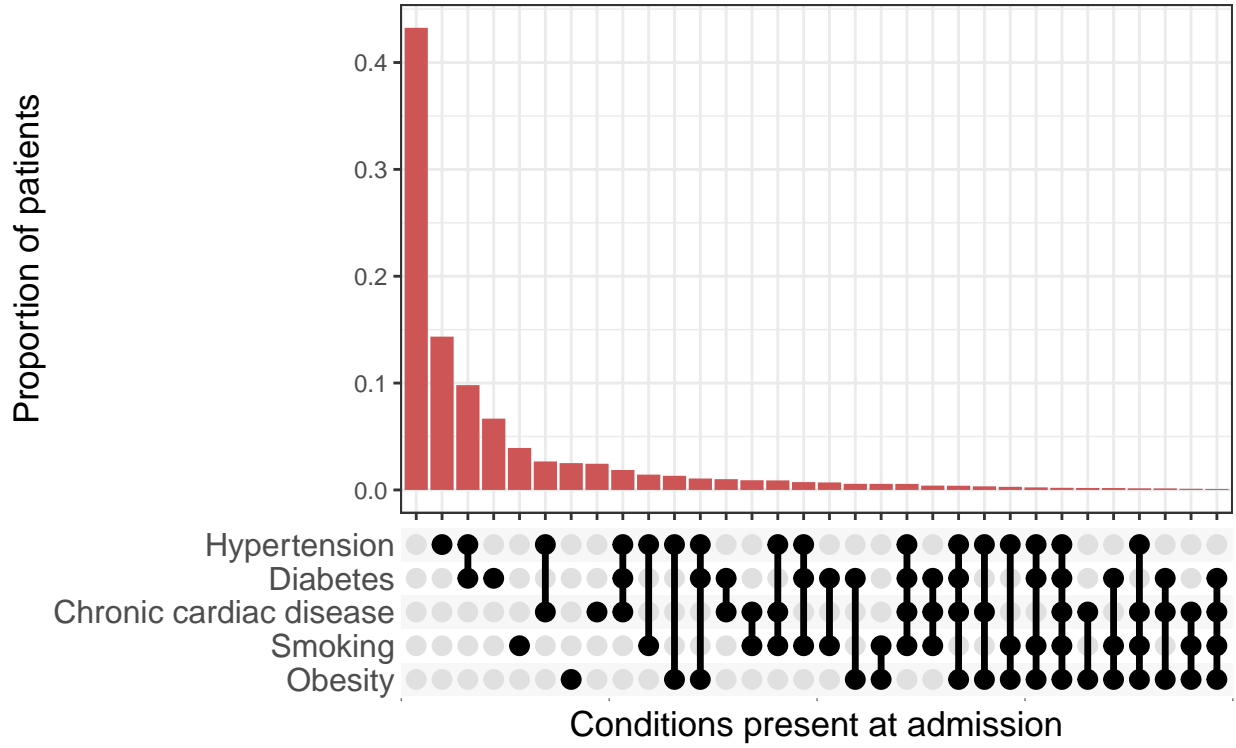

The age distribution of the most frequent concomitant conditions is presented in Figure 11. Dementia and hypertension increase with age.

Figure 11: Comorbidities recorded at hospital presentation stratified by age group. Boxes show the proportion of individuals with each symptom. The size of each box is proportional to the number of individuals represented. N is the number of individuals included in the plot (this varies between plots due to data completeness).

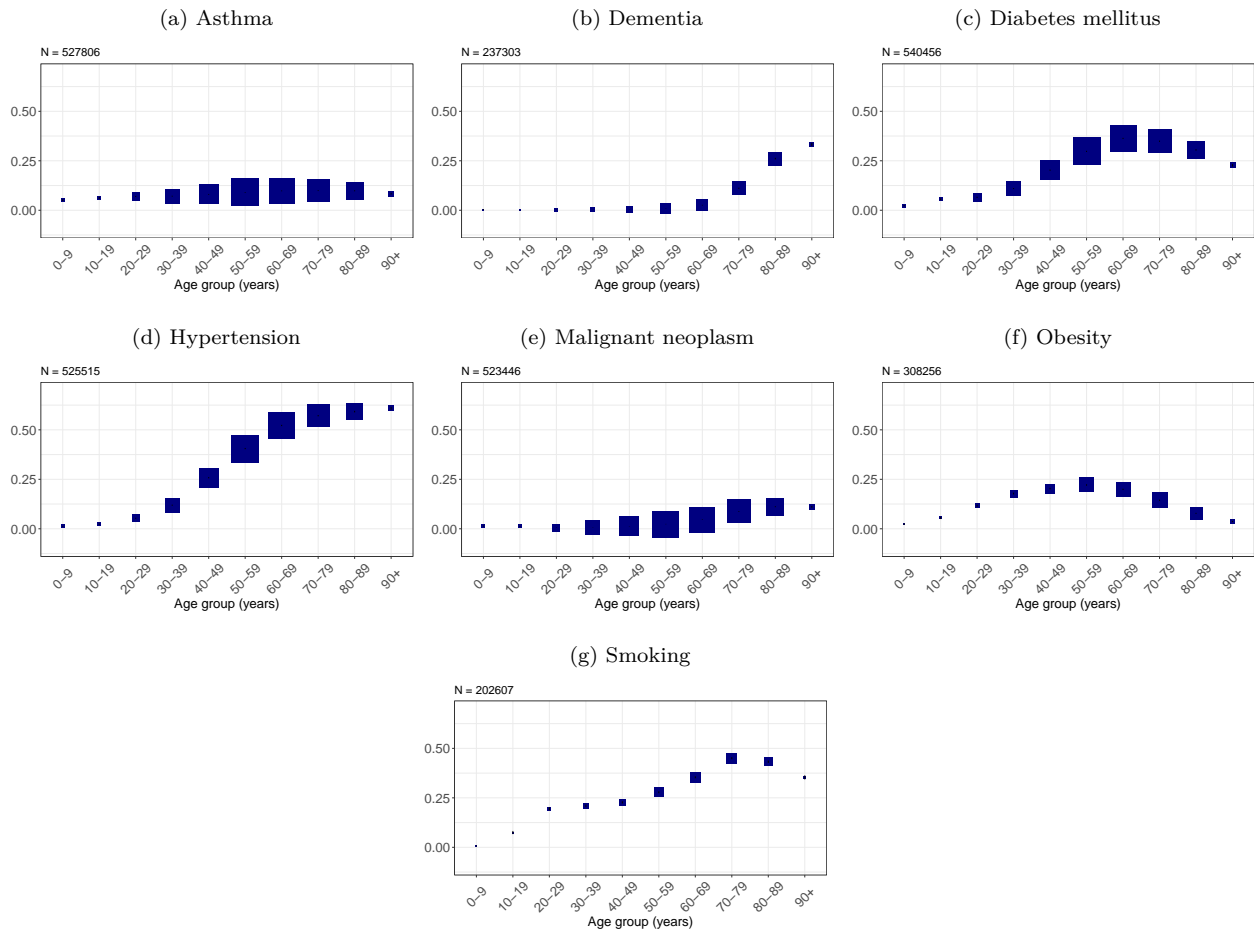



In Figure 12, the frequencies of most common comorbidities in patients by regions. Each panel corresponds to a different region, and within region, more frequent comorbidities correspond to higher y-axis coordinates. To improve visualization, transparency decreases with increasing frequency. The most common comorbidities are hypertension, diabetes, obesity, chronic cardiac disease, smoking, which are similar across regions.

Figure 12: Comorbidities recorded at hospital presentation stratified by region. The numbers next to each bar represent patients presented with this symptom/patients recorded. The N in the title represents the total number of patients in each region, including those with or without symptoms recorded.

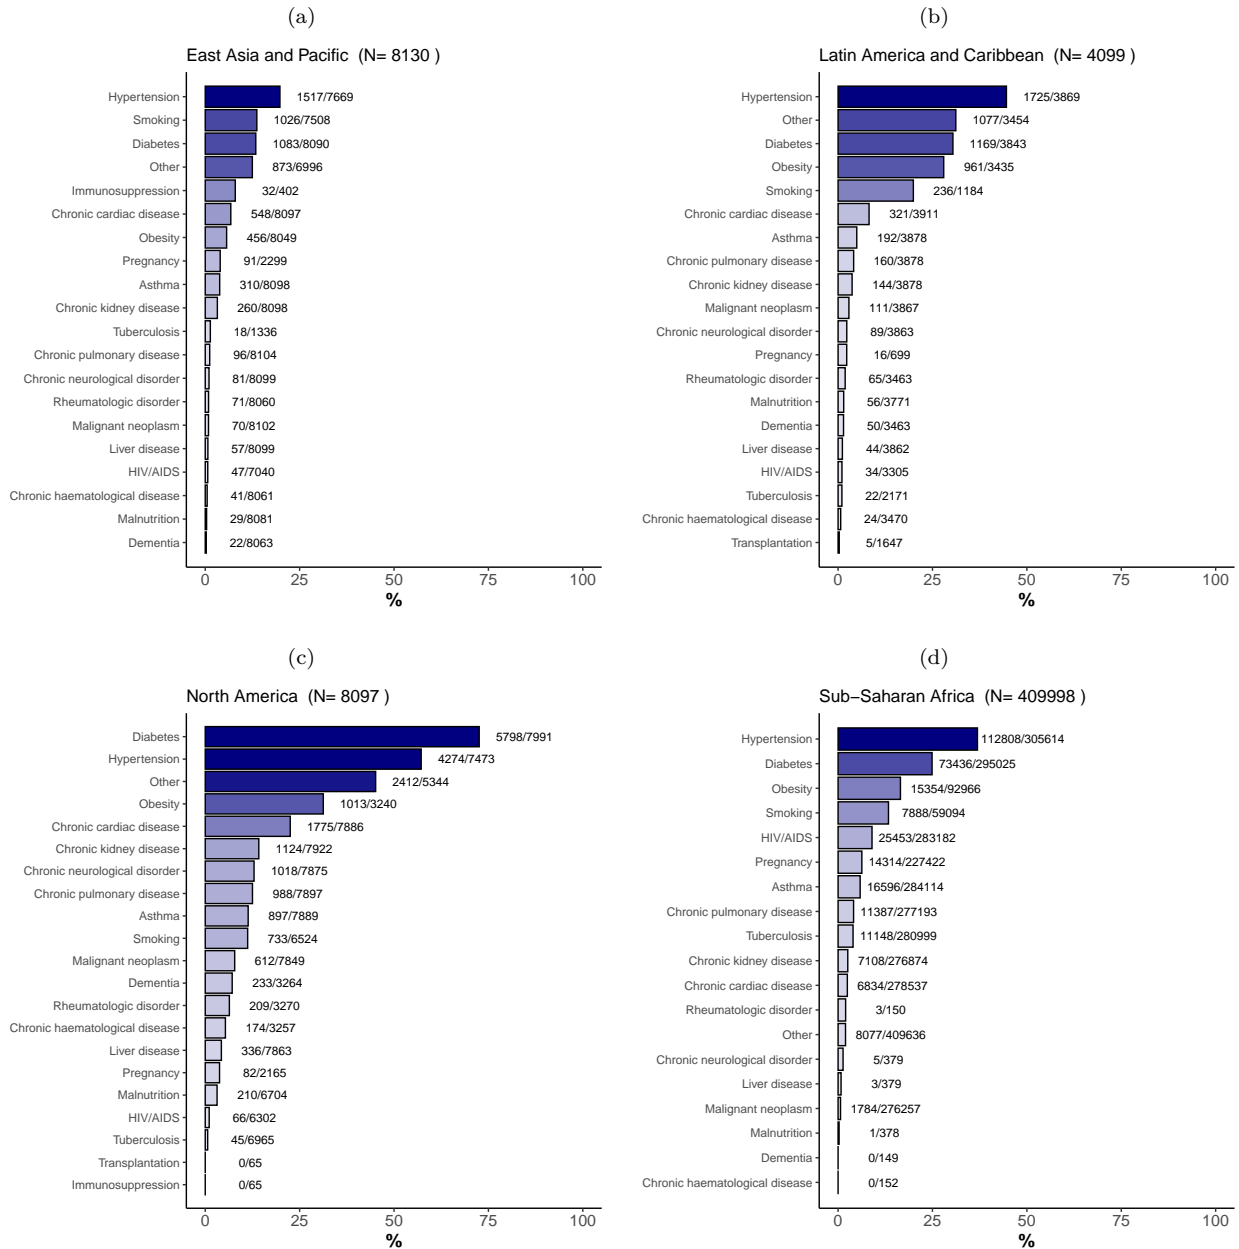

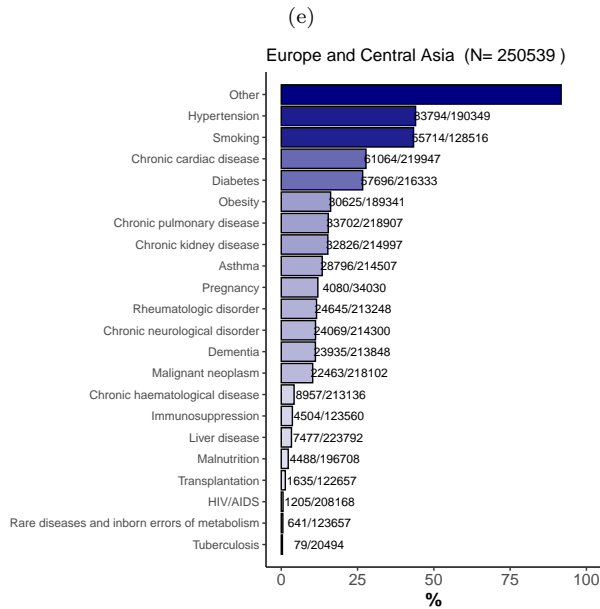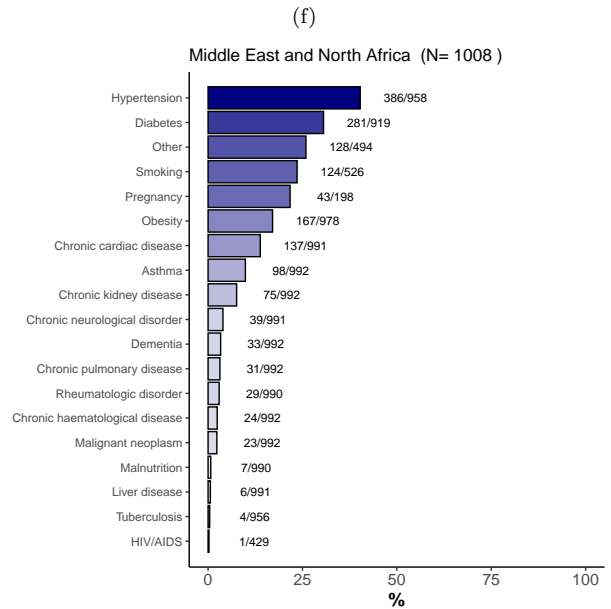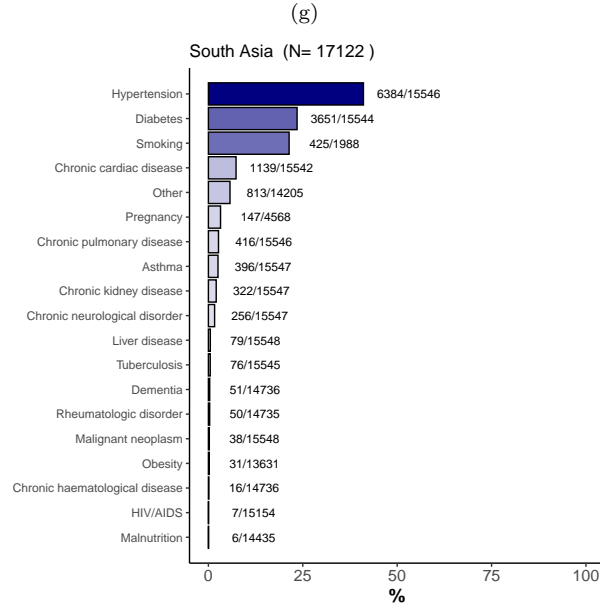

## Vital signs

Oxygen saturation was recorded for 229816 patients at admission. Of these, 34.4% were on oxygen therapy, and 65.6% were not. At admission, the median oxygen saturation of those who were on oxygen therapy was 95%, whereas the median was 96% for those who were not on oxygen therapy (Figure 13 provides a breakdown of oxygen saturation by age and oxygen therapy status). Among those who were on oxygen therapy at admission ( $N = 79059$ ), 34.9% had oxygen saturation  $<94$ , and among those who were not on oxygen therapy at admission ( $N = 150757$ ), 25.6% had oxygen saturation  $<94$ . All vital signs are presented in Figure 13 by age.

Figure 10: Box and whisker plots for observations at hospital presentation stratified by age group.  $N$  is the number of individuals included in the plot (this varies between plots due to data completeness).

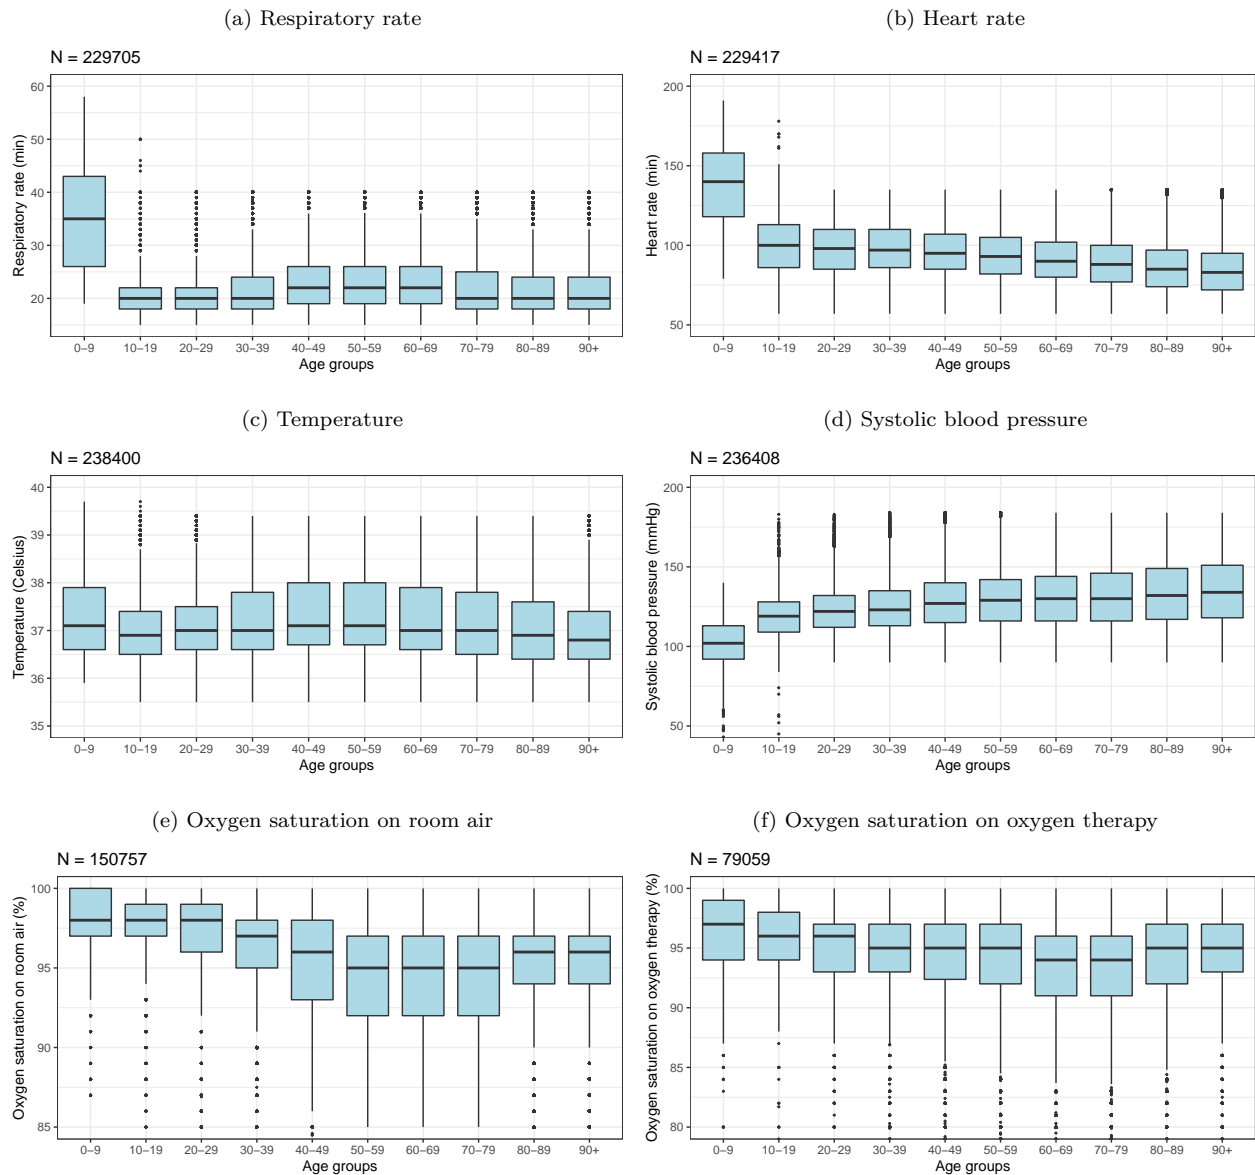

## Laboratory values

Laboratory tests results are available for a minority of patients. They are summarised in Figure 14.

Figure 11: Box and whisker plots for laboratory results within 24 hours of hospital presentation stratified by age group. N is the number of individuals included in the plot (this varies between plots due to data completeness).

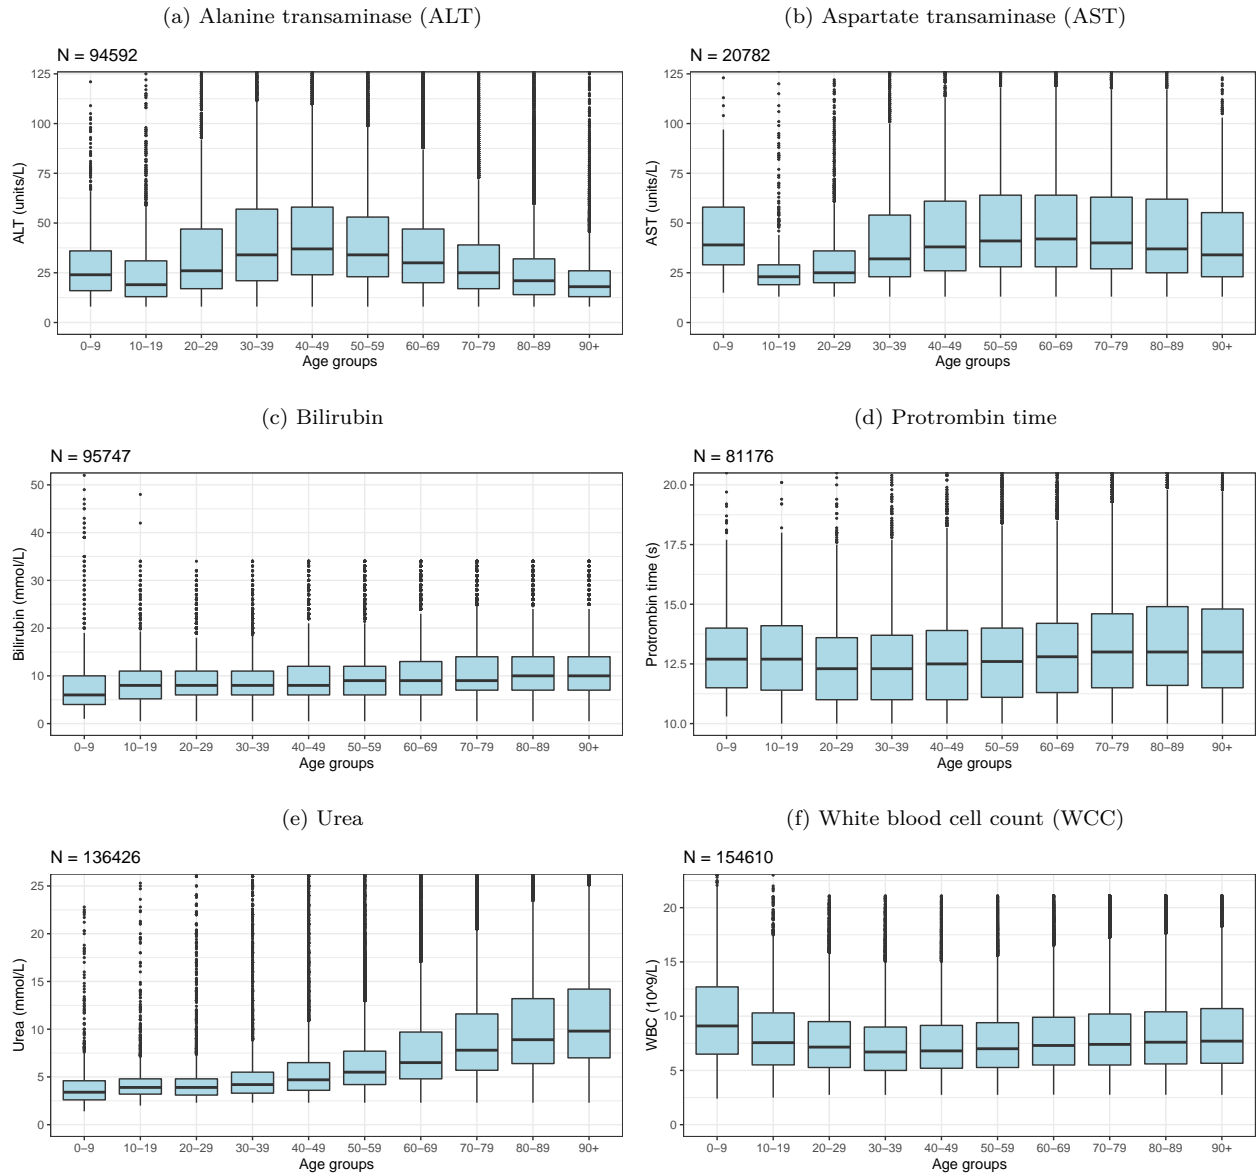

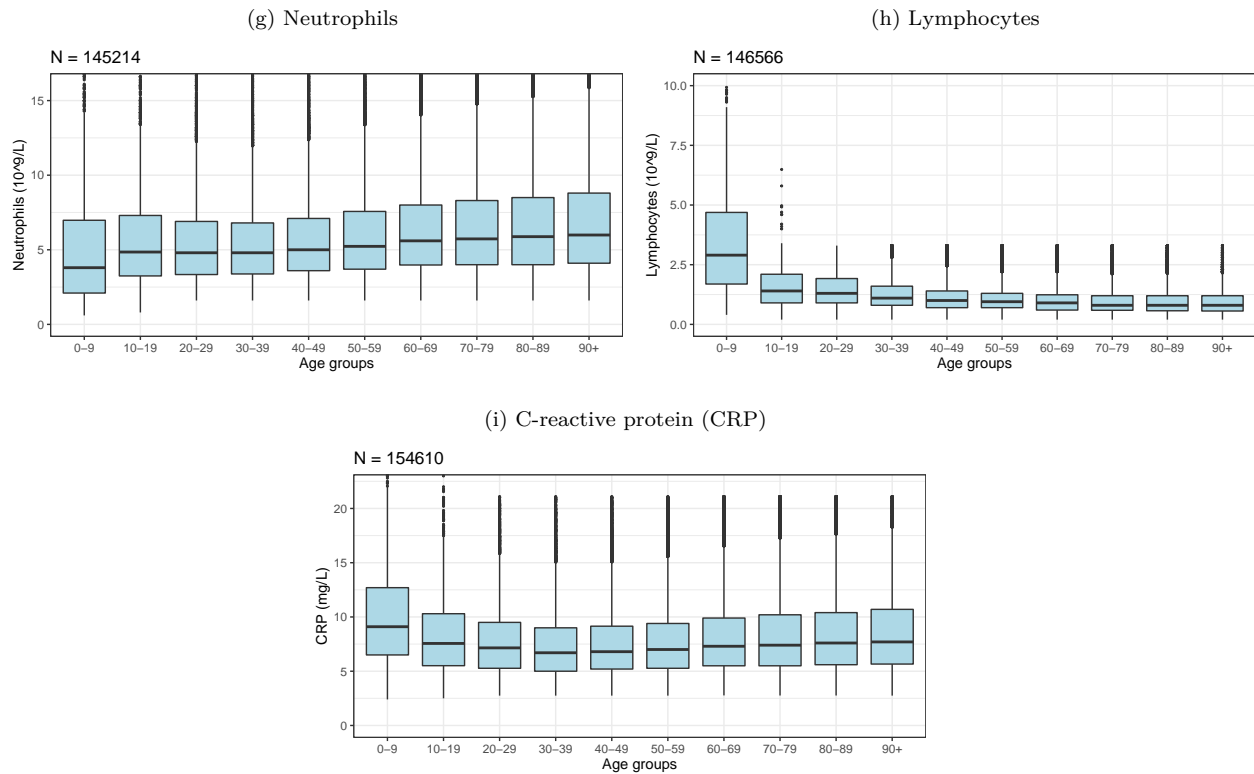

## Treatment

Antibiotics were given to 247929/669630 (37%) patients, and 62541/665930 (9.4%) received antivirals. These treatment categories are not mutually exclusive since some patients receive multiple treatments - the denominators differ due to data completeness. Of 608474 patients with data available on oxygen supplementation within 24 hours from admission, 185062 (30.4%) received supplemental oxygen and 423412 (69.6%) did not. Throughout their stay in the hospital, 367835/689932 (53.3%) patients received some degree of oxygen supplementation; of these, 47191/453856 (10.4%) received NIV and 65617/684764 (9.6%) IMV.

Corticosteroids were administered to 169595/677012 (25.1%) patients. This includes 29942/64403 (46.5%) of those who received IMV, 141810/346679 (40.9%) of those who had oxygen therapy but not IMV, and 24526/314299 (7.8%) of those who had no oxygen therapy. On 16 June 2021, results for dexamethasone were released from the RECOVERY randomized controlled trial [20,21]. This trial found that dexamethasone reduced deaths for patients receiving IMV and oxygen therapy, but not among patients not receiving respiratory support. Of patients admitted since 16 June 2020, corticosteroids were given to 22922/48951 (46.8%) of those who received IMV, and 21521/274026 (7.9%) of those with no oxygen therapy.

Figure 15: Treatments in the entire population

(a) Proportions of patients receiving each treatment. Bars are annotated with a fraction indicating the number of individuals receiving each treatment over the number for which this information was non-missing. Oxygen therapy variable includes high flow nasal cannula, non-invasive ventilation, and invasive ventilation.

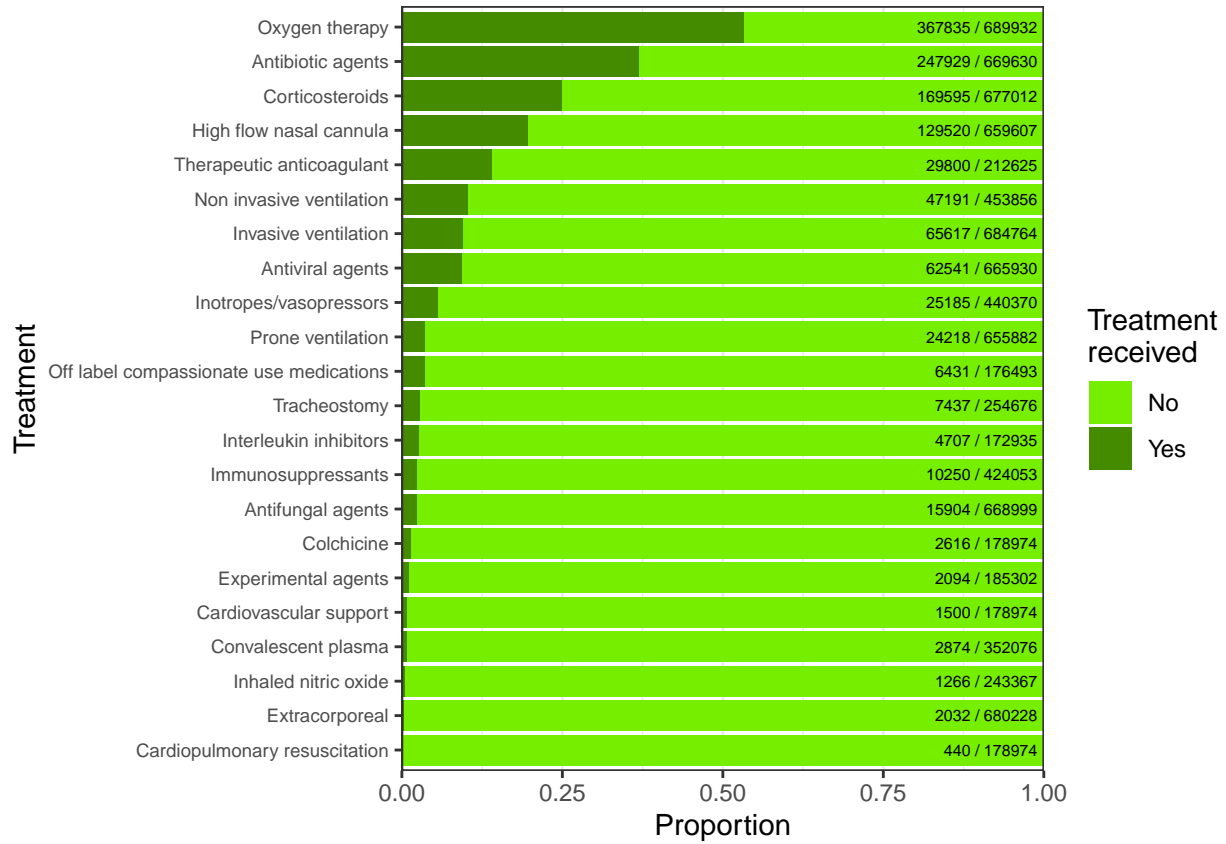

Table 5: Treatment use. The counts presented for treatments include all cases, not only cases with complete details of treatments (as expressed in the summary). Oxygen therapy variable includes high flow nasal cannula, non-invasive ventilation, and invasive ventilation.

| Treatments                              | Present       | Absent        | Unknown       |
|-----------------------------------------|---------------|---------------|---------------|
| Oxygen therapy                          | 367835 (0.53) | 322097 (0.46) | 9082 (0.01)   |
| Antibiotic agents                       | 247929 (0.35) | 421701 (0.6)  | 29384 (0.04)  |
| Corticosteroids                         | 169595 (0.24) | 507417 (0.73) | 22002 (0.03)  |
| High flow nasal cannula                 | 129520 (0.19) | 530087 (0.76) | 39407 (0.06)  |
| Invasive ventilation                    | 65617 (0.09)  | 619147 (0.89) | 14250 (0.02)  |
| Antiviral agents                        | 62541 (0.09)  | 603389 (0.86) | 33084 (0.05)  |
| Non invasive ventilation                | 47191 (0.07)  | 406665 (0.58) | 245158 (0.35) |
| Therapeutic anticoagulant               | 29800 (0.04)  | 182825 (0.26) | 486389 (0.7)  |
| Inotropes/vasopressors                  | 25185 (0.04)  | 415185 (0.59) | 258644 (0.37) |
| Prone ventilation                       | 24218 (0.03)  | 631664 (0.9)  | 43132 (0.06)  |
| Antifungal agents                       | 15904 (0.02)  | 653095 (0.93) | 30015 (0.04)  |
| Immunosuppressants                      | 10250 (0.01)  | 413803 (0.59) | 274961 (0.39) |
| Tracheostomy                            | 7437 (0.01)   | 247239 (0.35) | 444338 (0.64) |
| Off label/compassionate use medications | 6431 (0.01)   | 170062 (0.24) | 522521 (0.75) |
| Interleukin inhibitors                  | 4707 (0.01)   | 168228 (0.24) | 526079 (0.75) |
| Convalescent plasma                     | 2874 (0)      | 349202 (0.5)  | 346938 (0.5)  |
| Colchicine                              | 2616 (0)      | 176358 (0.25) | 520040 (0.74) |
| Experimental agents                     | 2094 (0)      | 183208 (0.26) | 513712 (0.73) |
| Extracorporeal                          | 2032 (0)      | 678196 (0.97) | 18786 (0.03)  |
| Cardiovascular support                  | 1500 (0)      | 177474 (0.25) | 520040 (0.74) |
| Inhaled nitric oxide                    | 1266 (0)      | 242101 (0.35) | 455647 (0.65) |
| Cardiopulmonary resuscitation           | 440 (0)       | 178534 (0.26) | 520040 (0.74) |



(b) Distribution of combinations of antimicrobial treatments and steroids administered during hospital stay, across all patients with completed hospital stay and recorded treatment data. Oxygen therapy variable includes high flow nasal cannula, non-invasive ventilation, and invasive ventilation.

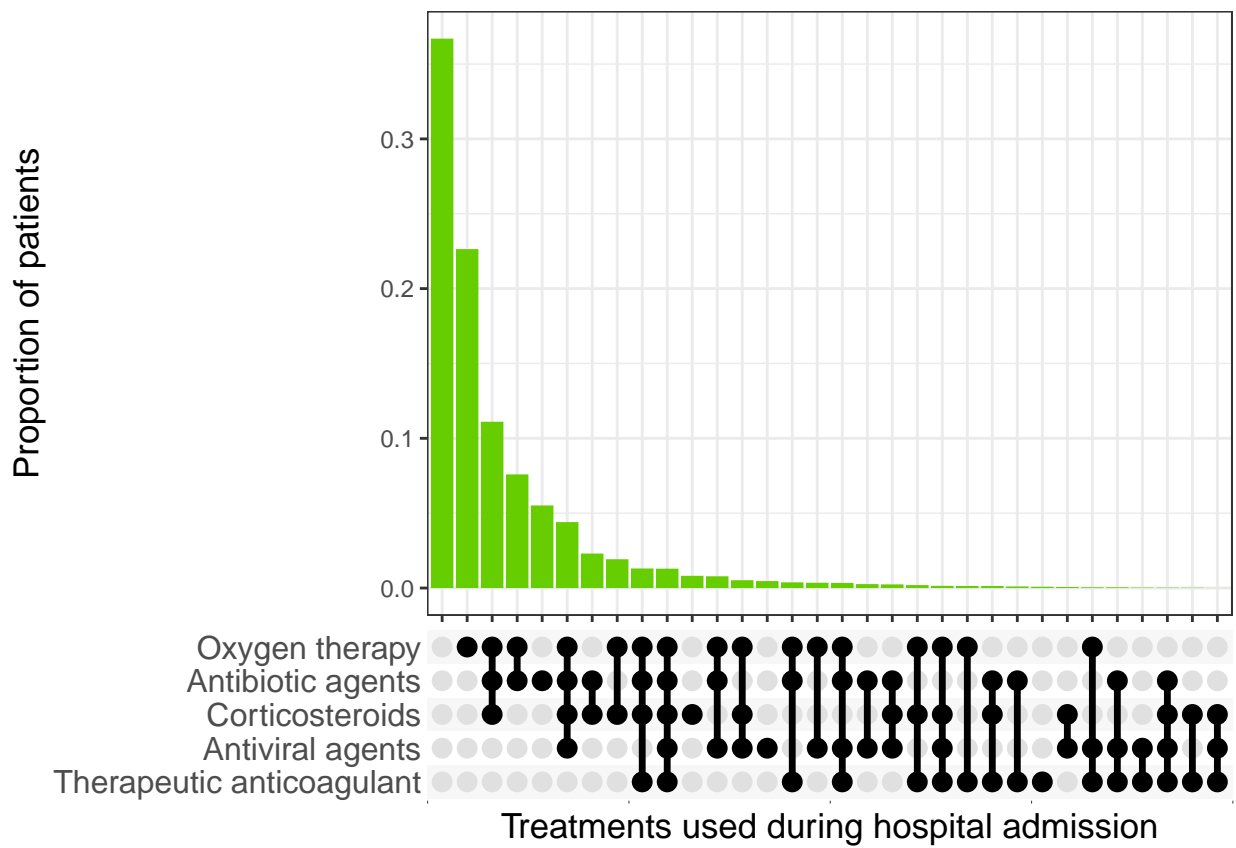

## Intensive Care and High Dependency Unit Treatments

Of the 699014 patients with data on ward admissions available, a total of 109599 (15.7%) were admitted at some point of their illness into an intensive care unit (ICU) or high dependency unit (HDU), among which, 33429 (53.9%) on the day of admission (47573 patients without admission date data).

The range of treatments received whilst in ICU/HDU is presented in Figure 15 a and b. Of the patients admitted into ICU/HDU, 45957/50560 (90.9%) received antibiotics and 19260/49848 (38.6%) antivirals. 51760/59650 (86.8%) received some degree of oxygen supplementation, of which, 27761/58987 (47.1%) received NIV and 35749/58349 (61.3%) IMV.

A total of 47191 patients received non-invasive mechanical ventilation (NIV). The mean and median number of days from admission to receiving NIV were 2.2 days and 1 days respectively (SD: 3.6 days) – estimated from records on cases with complete records on dates of hospital admission and NIV onset (N = 31263). The mean and median durations for NIV were 3.7 days and 2 days respectively (SD: 3.3 days) – estimated based on only those cases which have complete NIV duration records (N = 7672).

A total of 65617 patients received invasive mechanical ventilation (IMV). The mean and median durations from admission to receiving IMV were 3.4 days and 2 days respectively (SD: 4.7 days) – estimated from records on cases with complete records on dates of hospital admission and IMV onset (N = 23328). The mean, median and SD for the duration of IMV – estimated based on all 33372 cases with complete records on IMV stays – were 10.2 days, 7 days and 9.7 days respectively.

Figure 16: Treatments in the ICU/HDU population

(a) Proportions of patients receiving each treatment. Bars are annotated with a fraction indicating the number of individuals receiving each treatment over the number for which this information was non-missing. Oxygen therapy variable includes high flow nasal cannula, non-invasive ventilation, and invasive ventilation.

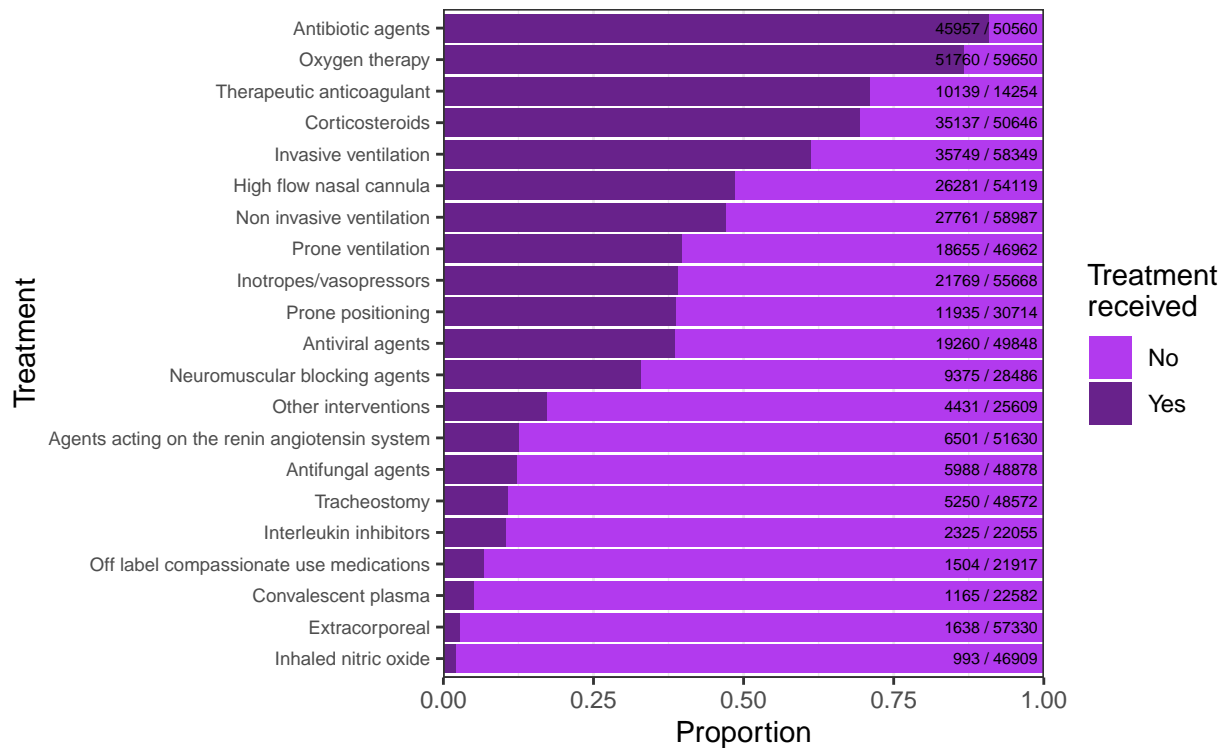

(b) Distribution of combinations of treatments administered during ICU/HDU stay. Filled and empty circles below the x-axis indicate treatments that were and were not administered respectively. Oxygen therapy variable includes high flow nasal cannula, non-invasive ventilation, and invasive ventilation.

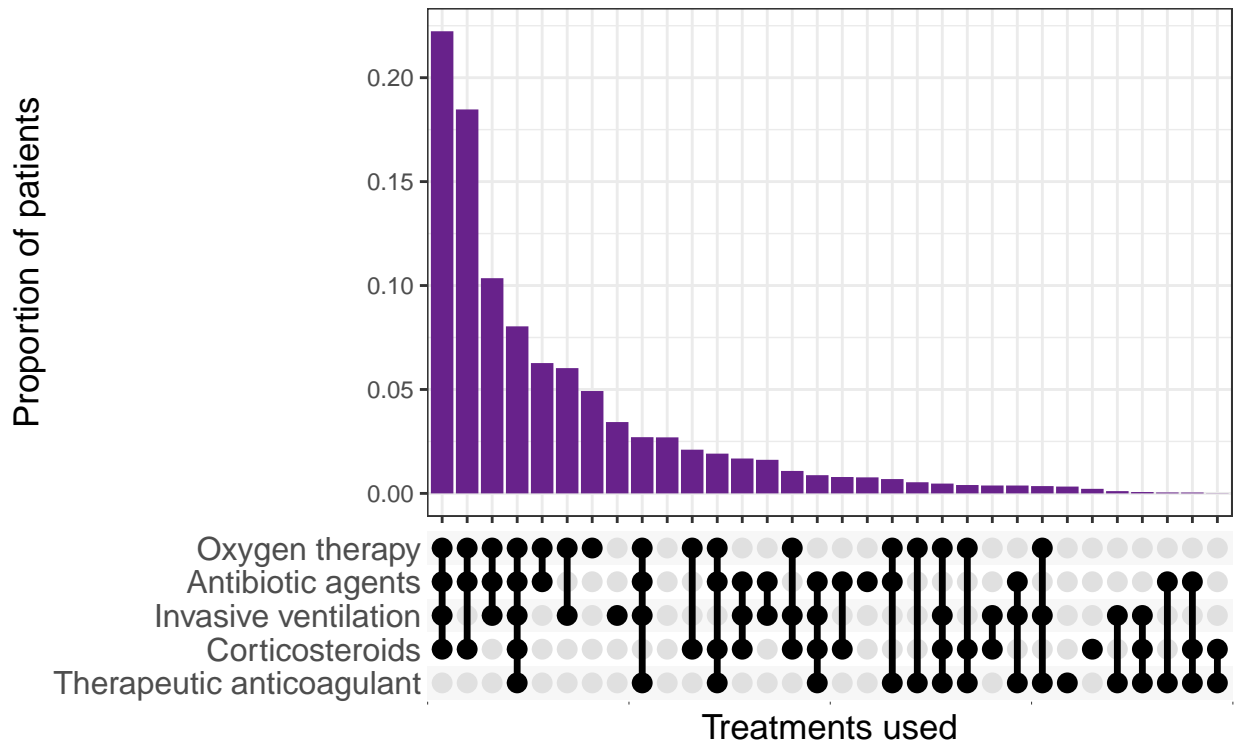

## Key time variables

The key time variables are presented in Table 6. Patients tend to come to the hospital relatively early into their illness with a mean of 3 days and a median of 1 days from symptoms onset. 53.9% of ICU/HDU admissions occur within the first day at the hospital. The mean and median duration of hospital stay are 9.2 and 6 days, respectively. The duration of stay in ICU/HDU had a mean of 9.3 days and a median of 6 (SD: 9.2 days) – estimated on only those cases with complete records for ICU/HDU duration or ICU/HDU start/end dates ( $N = 57605$ ).

Table 6: Key time variables. SD: Standard deviation; IQR: Interquartile range. Outliers (values greater than 120) were excluded prior to the computation of estimates.

| Time (in days)             | Mean | SD  | Median | IQR  |
|----------------------------|------|-----|--------|------|
| Length of hospital stay    | 9.2  | 9.2 | 7      | 3-12 |
| Symptom onset to admission | 3.0  | 4.1 | 1      | 0-5  |
| Admission to ICU entry     | 1.7  | 3.1 | 0      | 0-2  |
| Duration of ICU            | 9.3  | 9.2 | 6      | 3-13 |
| Admission to IMV           | 3.4  | 4.7 | 2      | 0-5  |
| Duration of IMV            | 10.2 | 9.7 | 7      | 3-15 |
| Admission to NIV           | 2.2  | 3.6 | 1      | 0-3  |
| Duration of NIV            | 3.7  | 3.3 | 2      | 1-5  |

The distribution of the number of days from admission to ICU admission is shown in Figure 18.

Figure 17: Distribution of lengths of stay for patients who were admitted to ICU/HDU: total length of stay for this group and length of stay within intensive care. This only includes cases with reported completed stays. The coloured areas indicate the kernel probability density of the observed data and the box plots show the median and interquartile range of the variable of interest.

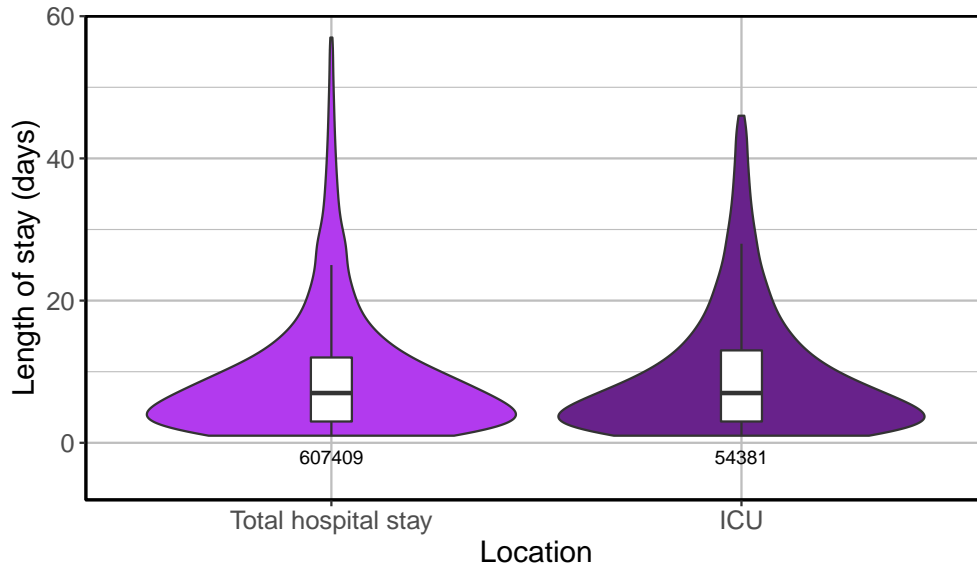

The observed mean duration for the number of days from hospital admission to outcome (death or discharge) was 9, with SD 8.9 days and a median of 6 days. These estimates are based on all cases which have complete records on length of hospital stay ( $N = 607975$ ). The distributions of length of hospital stay are presented In Figure 19a according to sex and 19b by patient age group.

Figure 18: Distribution of time (in days) from hospital admission to ICU admission. The figure displays data on only those cases with a reported ICU start date.

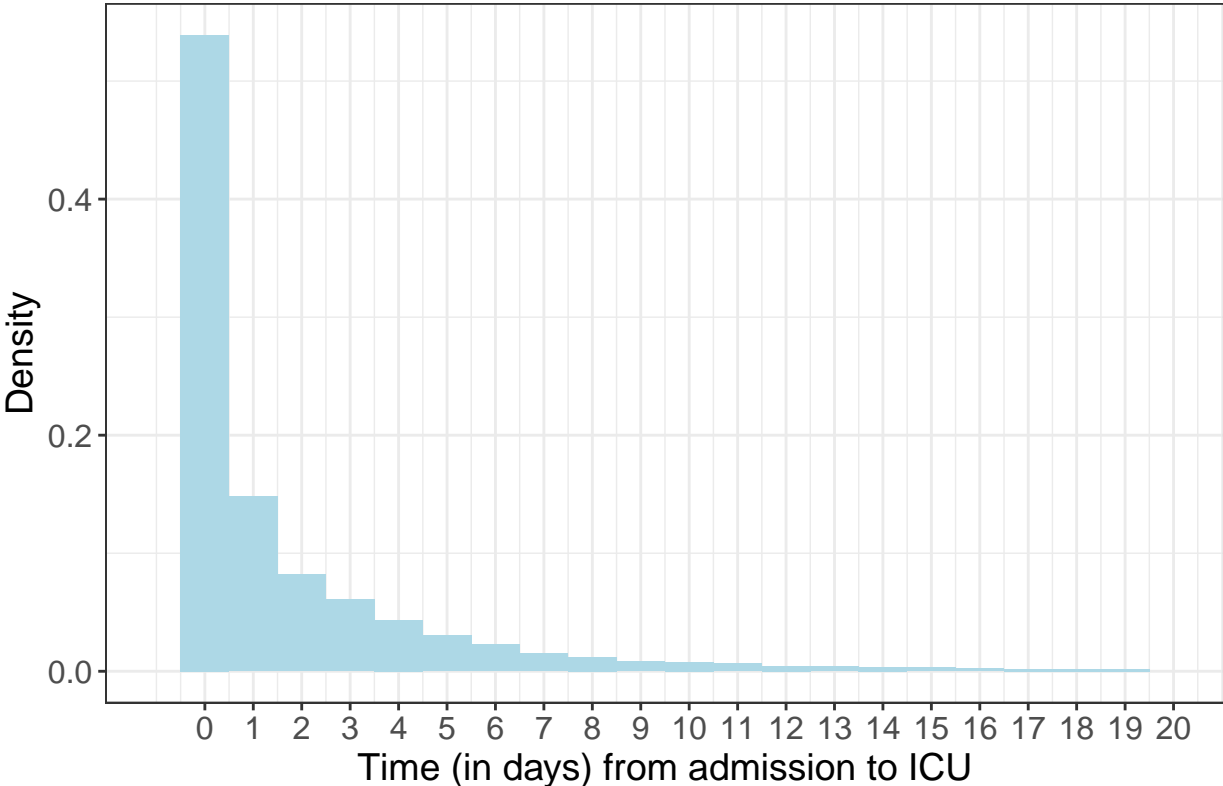

Figure 19: Distribution of length of hospital stay. This only includes cases with reported outcomes. The coloured areas indicate the kernel probability density of the observed data and the box plots show the median and interquartile range of the variable of interest.

(a) Distribution of length of hospital stay, according to sex.

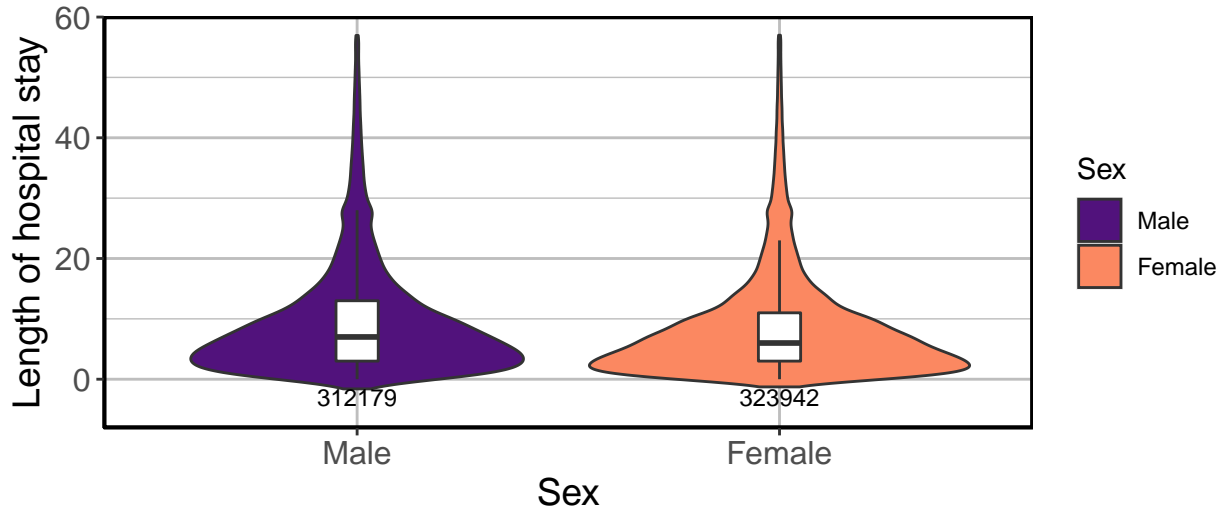

(b) Distribution of length of hospital stay, according to age.

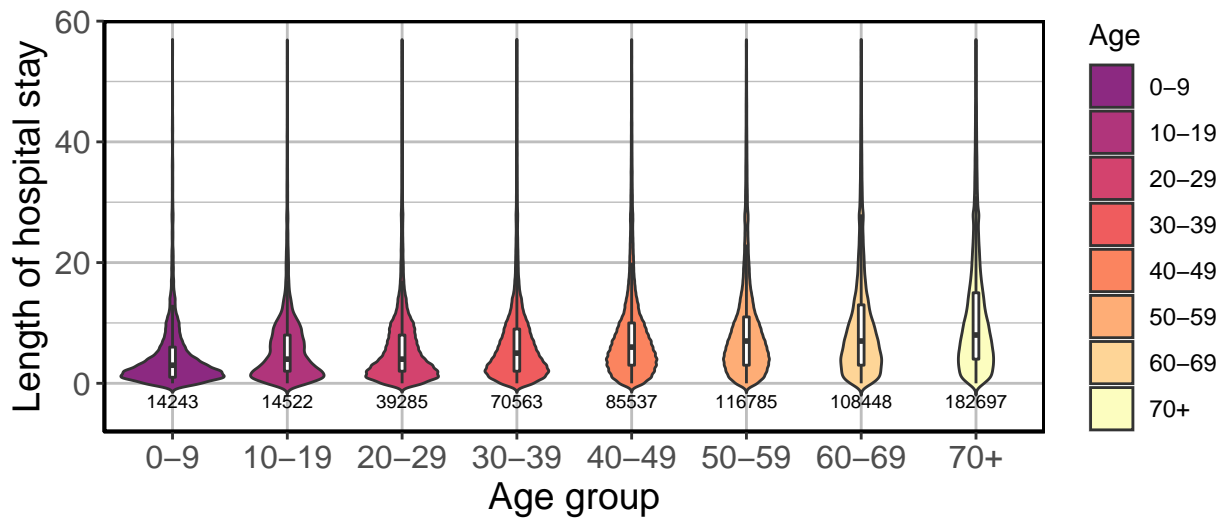



## Outcomes

Outcomes are recorded for 632518 patients (90.5%), consisting of 481050 recoveries and 151468 deaths. Outcome records are unavailable for 66272 patients.

The overall estimated case fatality ratio (CFR) is 23.9% (95% CI 23.8-24.1) and is 37.1% (95% CI 36.8-37.4) for patients admitted to ICU/HDU - calculated out of those with data on outcome.

Figure 20: The distribution of patient status by number of days after admission. Patients with 'unknown' status have left the site at the time of report but have unknown outcomes due to missing data.

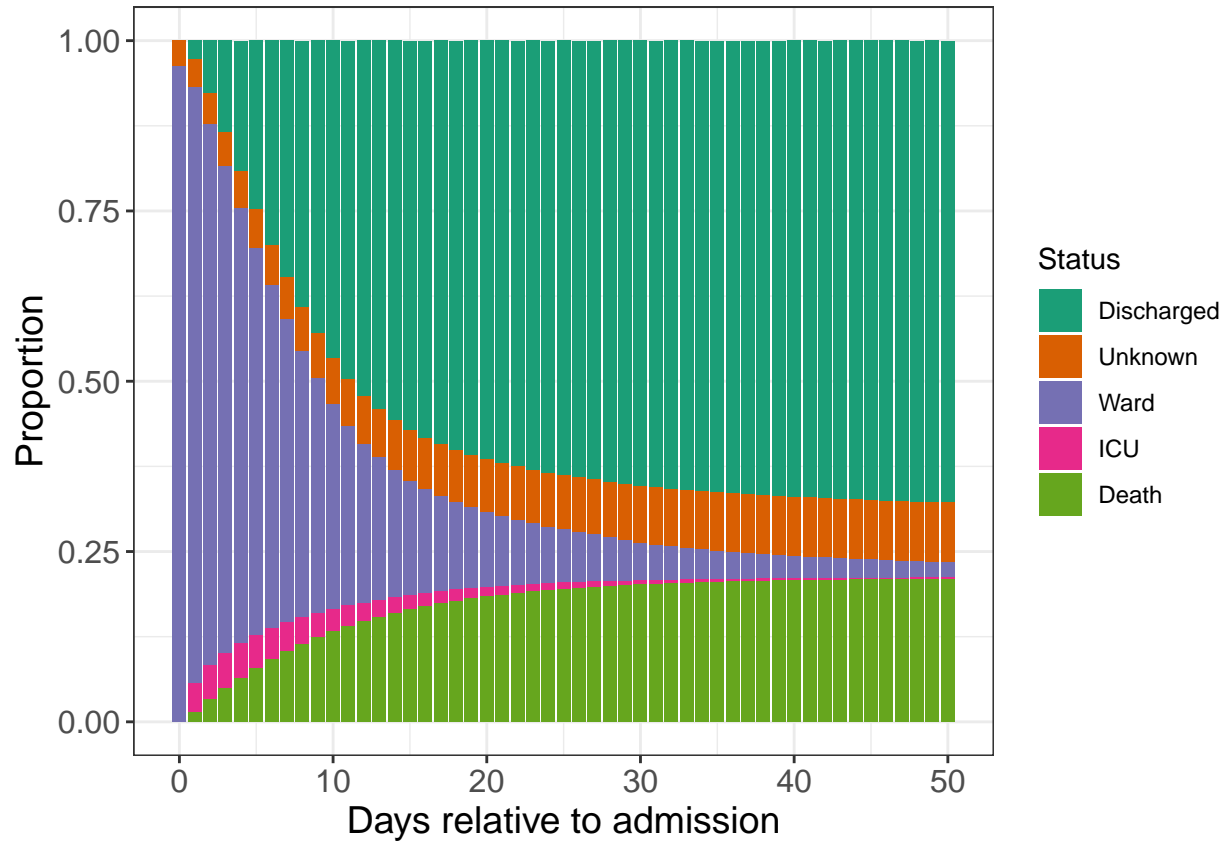

Figure 21: Cumulative patient numbers and outcomes by epidemiological week of admission (or, for patients infected in hospital, of symptom onset).

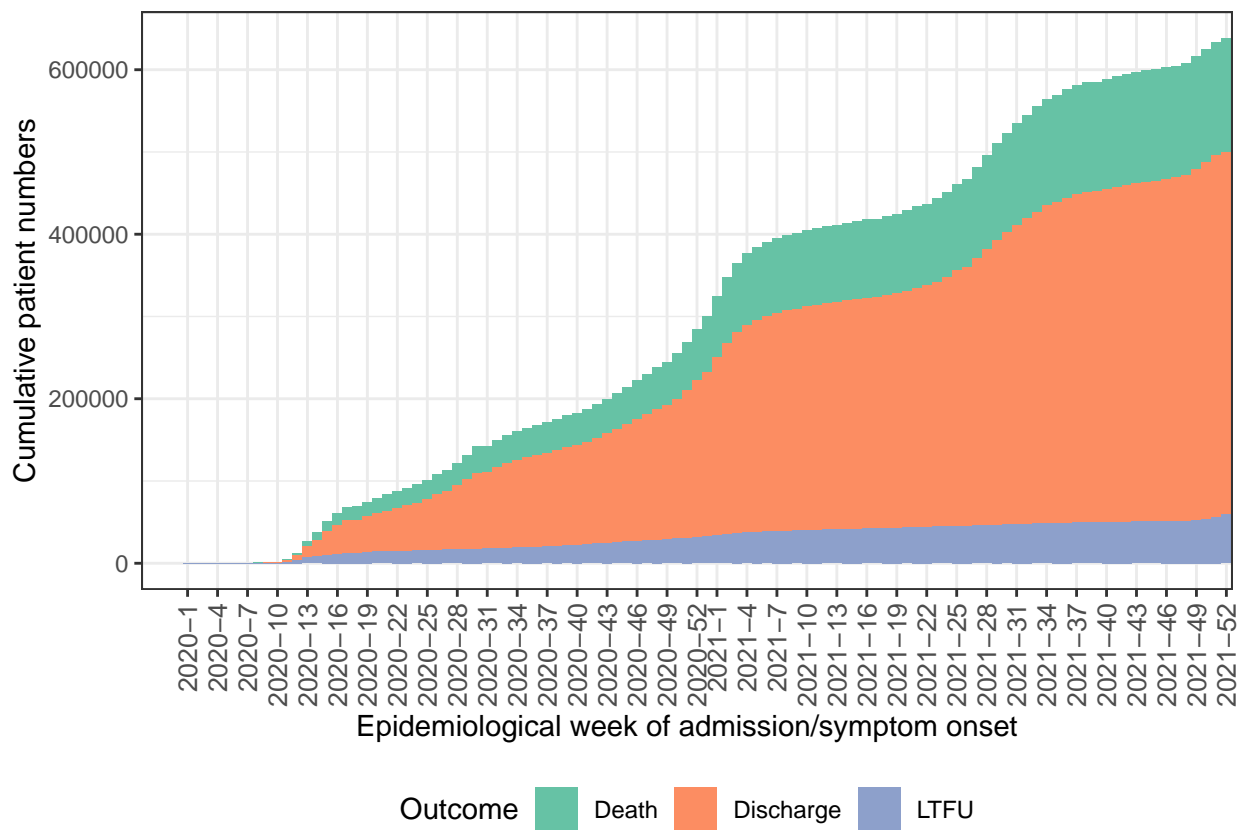

## Discussion and conclusions

COVID-19 has tested the effectiveness of ISARIC's operating model: a global, open-source, collaborative approach set up 10 years ago to prevent illness and deaths from infectious disease outbreaks.

In January 2020, ISARIC launched its COVID-19 Clinical Characterisation Protocol (CCP) [<https://isaric.org/research/covid-19-clinical-research-resources/clinical-characterisation-protocol-ccp/>] and Case Report Form (CRF) [<https://isaric.org/research/covid-19-clinical-research-resources/covid-19-crf/>] as well as a free data management platform for researchers to upload their clinical data, globally. The ISARIC COVID-19 CCP database was open and publicly accessible from late January 2020, when less than a thousand COVID-19 cases had been reported globally; by mid-February 2020, the first patient record was successfully uploaded to the platform; by mid-March 2020, the platform had ten thousand records.

Now, 24 months into the pandemic, with more than 800,000 records, the ISARIC clinical data platform has grown to become the largest international individual patient dataset of COVID-19 hospitalised cases. ISARIC is a model of global peer-to-peer collaboration, with contributions by 1701 sites in 60 countries, with similar representations of patients from high-income and low- and middle-income countries.

This report describes the features of COVID-19 patients in the entire cohort, made from cases accrued over 24 months with different contributions from various countries. Everyone can trace the evolution over time of the database through 16 previous versions of this report [<https://isaric.org/research/covid-19-clinical-research-resources/evidence-reports/>]. In addition, specific questions regarding clinical presentations, risks factors for outcomes, and trends are addressed through ad-hoc analyses.

Partners can submit ad-hoc request to perform analyses, to access the 800,000 case-based dataset, by using our Statistical Analysis Plan form (SAP; <https://isaric.org/research/isaric-partner-analysis-frequently-asked-questions/>). Once a SAP has been submitted, our statistical team assesses the plan for quality of research and feasibility of data analysis. Then, our clinical team provides feedback on clinical relevance and overlap with other analyses. Once this process has been completed, the SAP is sent to all ISARIC collaborators for the opportunity to review. This initial peer review process ensures that research is of the utmost quality and it helps encourage a truly participatory approach.

All ISARIC contributors are invited to participate in analyses through review and input on the SAP and the resulting publication. The outputs of our joint work are disseminated as widely as possible to inform patient care and public health policy. ISARIC aims to include the names of all those who contribute data in the cited authorship of publications, subject to the submission of contact details and confirmation of acceptance of the final manuscript within the required timelines, per ICMJE policies and the ISARIC publication policy.

**What have our partners achieved** Using the ISARIC and ISARIC4C databases, our partners have produced a broad range of evidence. More than 50 reports and manuscripts have been published to date, and a further 25 are in progress or under peer-review. <https://isaric.org/document-library/> , <https://isaric4c.net/outputs/> and <https://isaric.org/research/covid-19-clinical-research-resources/accessing-covid-19-clinical-data/approved-uses-of-platform-data/>.

True international collaboration during a pandemic is key to putting data into action. ISARIC partners have achieved this objective, and the results are shown in this special issue with half a million patient records.

## Acknowledgement

This report is made possible through the efforts and expertise of the staff collecting data at our partner institutions across the globe, and the ISARIC Team. For a list of partners and team members, please visit [rg/research/covid-19-clinical-research-resources/covid-19-data-management-hosting/covid19-clinical-data-contributors-list/](https://isaric.org/research/covid-19-clinical-research-resources/covid-19-data-management-hosting/covid19-clinical-data-contributors-list/).

## References

- [1]WHO novel coronavirus 2019 (hyperlink to <https://www.who.int/emergencies/diseases/novel-coronavirus-2019>)
- [2]ISARIC Partner Analysis frequently asked questions (hyperlink to <https://isaric.org/research/isaric-partner-analysis-frequently-asked-questions/>)
- [3]International Severe Acute Respiratory and Emerging Infection Consortium, World Health Organization. ISARIC/WHO Clinical Characterisation Protocol for Severe Emerging Infections, version 3.2: ISARIC, 2020.
- [4]International Severe Acute Respiratory and Emerging Infection Consortium. COVID-19 CRF. Available at: <https://isaric.tghn.org/COVID-19-CRF/>.
- [5]Huang C, Wang Y, Li X, et al. Clinical features of patients infected with 2019 novel coronavirus in Wuhan, China. *Lancet* 2020; 395(10223): 497-506.
- [6]Yang X, Yu Y, Xu J, et al. Clinical course and outcomes of critically ill patients with SARS-CoV-2 pneumonia in Wuhan, China: a single-centered, retrospective, observational study. *Lancet Respir Med* 2020; 8(5): 475-81.
- [7]Zhou F, Yu T, Du R, et al. Clinical course and risk factors for mortality of adult inpatients with COVID-19 in Wuhan, China: a retrospective cohort study. *Lancet* 2020; 395(10229): 1054-62.
- [8]Dunning JW, Merson L, Rohde GGU, et al. Open source clinical science for emerging infections. *Lancet Infect Dis* 2014; 14(1): 8-9.
- [9]ISARIC clinical characterisation group. Global outbreak research: harmony not hegemony. *Lancet Infect Dis* 2020; 20(7): 770-2.
- [10]IDDO website (hyperlink to [www.iddo.org](http://www.iddo.org))
- [11]Clinical Data Interchange Standards Consortium (hyperlink to <https://www.cdisc.org/standards/foundational/sdtm>)
- [12]R Core Team (2020). R: A language and environment for statistical computing. R Foundation for Statistical Computing, Vienna, Austria. URL: <https://www.R-project.org/>.
- [13]Wickham et al. (2019). Welcome to the tidyverse. *Journal of Open Source Software*, 4(43), 1686, <https://doi.org/10.21105/joss.01686>
- [14]Adler et al. (2021). ff: Memory-Efficient Storage of Large Data on Disk and Fast Access Functions, <https://cran.r-project.org/web/packages/ff/index.html>
- [15]Wickham H (2021). dtplyr: Data Table Back-End for ‘dplyr’, <https://cran.r-project.org/web/packages/dtplyr/index.html>
- [16]Wickham H (2016). ggplot2: Elegant Graphics for Data Analysis. Springer-Verlag New York. ISBN 978-3-319-24277-4, <https://ggplot2.tidyverse.org>.
- [17]Ahlmann-Eltze C (2020). ggupset: Combination Matrix Axis for ‘ggplot2’ to Create ‘UpSet’ Plots. <https://cran.rstudio.com/web/packages/ggupset/index.html>
- [18]Xie Y (2021). knitr: A General-Purpose Package for Dynamic Report Generation in R. R package version 1.36, <https://yihui.org/knitr/>.
- [19]ISARIC Clinical Characterisation Group (2021). COVID-19 symptoms at hospital admission vary with age and sex: results from the ISARIC prospective multinational observational study. *Infection*, 1–17. Advance online publication. <https://doi.org/10.1007/s15010-021-01599-5>
- [20]RECOVERY (2020, 16 June). Low-cost dexamethasone reduces death by up to one third in hospitalised patients with severe respiratory complications of COVID-19. <https://www.recoverytrial.net/news/low-cost-dexamethasone-reduces-death-by-up-to-one-third-in-hospitalised-patients-with-severe-respiratory-complications-of-covid-19>
- [21]RECOVERY Collaborative Group (2020). Dexamethasone in hospitalized patients with Covid-19 — preliminary report. *New England Journal of Medicine* doi:10.1056/NEJMoa2021436

## Contributing individuals

Ali Abbas; Sheryl Ann Abdukahil; Nurul Najmee Abdulkadir; Ryuzo Abe; Laurent Abel; Lara Absil; Kamal Abu Jabal; Subhash Acharya; Andrew Acker; Shingo Adachi; Elisabeth Adam; Enrico Adriano; Diana

Adrião; Saleh Al Ageel; Shakeel Ahmed; Marina Aiello; Kate Ainscough; Eka Airlangga; Tharwat Aisa; Ali Ait Hssain; Younes Ait Tamlihat; Takako Akimoto; Ernita Akmal; Eman Al Qasim; Razi Alalqam; Angela Alberti; Tala Al-dabbous; Senthilkumar Alegesan; Cynthia Alegre; Marta Alessi; Beatrice Alex; Kévin Alexandre; Abdulrahman Al-Fares; Huda Alfoudri; Adam Ali; Imran Ali; Naseem Ali Shah; Kazali Enagnon Alidjnoun; Jeffrey Aliudin; Qabas Alkhafajee; Clotilde Allavena; Nathalie Allou; Aneela Altaf; João Melo Alves; João Alves; Rita Alves; Maria Amaral; Nur Amira; Heidi Ammerlaan; Phoebe Ampaw; John Amuasi; Roberto Andini; Margarita Andreeva; Claire Andrejak; Andrea Angheben; François Angoulvant; Séverine Ansart; Sivanesen Anthonidass; Massimo Antonelli; Carlos Alexandre Antunes de Brito; Kazi Rubayet Anwar; Ardiyan Apriyana; Yaseen Arabi; Irene Aragao; Francisco Arancibia; Carolline Araujo; Antonio Arcadipane; Patrick Archambault; Lukas Arenz; Jean-Benoît Arlet; Christel Arnold-Day; Ana Aroca; Lovkesh Arora; Rakesh Arora; Elise Artaud-Macari; Diptesh Aryal; Motohiro Asaki; Angel Asensio; Elizabeth Ashley; Muhammad Ashraf; Namra Asif; Mohammad Asim; Jean Baptiste Assie; Amirul Asyraf; Anika Atique; AM Udara Lakshan Attanyake; Johann Auchabie; Hugues Aumaitre; Adrien Auvet; Sergey Avdeev; Eyvind W. Axelsen; Laurène Azemar; Cecile Azoulay; Benjamin Bach; Delphine Bachelet; Claudine Badr; Roar Bævre-Jensen; Nadia Baig; J. Kenneth Baillie; J Kevin Baird; Erica Bak; Agamemnon Bakakos; Nazreen Abu Bakar; Andriy Bal; Mohanaprasanth Balakrishnan; Valeria Balan; Firouzé Bani-Sadr; Renata Barbalho; Nicholas Yuri Barbosa; Wendy S. Barclay; Saef Umar Barnett; Michaela Barnikel; Helena Barrasa; Audrey Barrelet; Cleide Barrigoto; Marie Bartoli; Cheryl Bartone; Joaquín Baruch; Mustehan Bashir; Romain Basmaci; Muhammad Fadhli Hassin Basri; Denise Battaglini; Jules Bauer; Diego Fernando Bautista Rincon; Denisse Bazan Dow; Abigail Beane; Alexandra Bedossa; Ker Hong Bee; Husna Begum; Sylvie Behilill; Karine Beirut; Albertus Beishuizen; Aleksandr Beljantsev; David Bellemare; Anna Beltrame; Anna Beltrame; Beatriz Amorim Beltrão; Marine Beluze; Nicolas Benech; Lionel Eric Benjiman; Dehbia Benkerrou; Suzanne Bennett; Luís Bento; Jan-Erik Berdal; Delphine Bergeaud; Hazel Bergin; José Luis Bernal Sobrino; Giulia Bertoli; Lorenzo Bertolino; Simon Bessis; Adam Betz; Sybille Bevilacqua; Karine Bezulier; Amar Bhatt; Krishna Bhavsar; Isabella Bianchi; Claudia Bianco; Farah Nadiyah Bidin; Moirangthem Bikram Singh; Felwa Bin Humaid; Mohd Nazlin Bin Kamarudin; François Bissuel; Patrick Biston; Laurent Bitker; Jonathan Bitton; Pablo Blanco-Schweizer; Catherine Blier; Frank Bloos; Mathieu Blot; Lucille Blumberg; Polina Bobkova; Filomena Boccia; Laetitia Bodenes; Alice Bogaarts; Debby Bogaert; Anne-Hélène Boivin; Pierre-Adrien Bolze; François Bompard; Patrizia Bonelli; Aurelius Bonfasius; Diogo Borges; Raphaël Borie; Hans Martin Bosse; Elisabeth Botelho-Nevers; Lila Bouadma; Olivier Bouchaud; Sabelline Bouchez; Dounia Bouhmani; Damien Bouhour; Kévin Bouiller; Laurence Bouillet; Camile Bouisse; Thipsavanh Bounphiengsy; Latsani-phone Bountthasavong; Anne-Sophie Boureau; John Bourke; Maude Bouscambert; Aurore Bousquet; Jason Bouziotis; Bianca Boxma; Marielle Boyer-Besseyre; Maria Boylan; Fernando Augusto Bozza; Axelle Bracconnier; Cynthia Braga; Timo Brandenburger; Filipa Brás Monteiro; Luca Brazzi; Dorothy Breen; Patrick Breen; Patrick Breen; Kathy Brickell; Alex Browne; Shaunagh Browne; Nicolas Brozzi; Sonja Hjellegjerde Brunvoll; Marjolein Brusse-Keizer; Nina Buchtele; Christian Buesaquillo; Polina Bugaeva; Marielle Buisson; Danilo Buonsenso; Erlina Burhan; Aidan Burrell; Ingrid G. Bustos; Denis Butnaru; André Cabie; Susana Cabral; Eder Caceres; Cyril Cadoz; Mia Callahan; Kate Calligy; Jose Andres Calvache; Caterina Caminiti; João Camões; Valentine Campana; Paul Campbell; Josie Campisi; Cecilia Canepa; Mireia Cantero; Janice Caoli; Pauline Caraux-Paz; Sheila Cárcel; Chiara Simona Cardellino; Filipa Cardoso; Filipe Cardoso; Nelson Cardoso; Sofia Cardoso; Simone Carelli; Francesca Carlacci; Nicolas Carlier; Thierry Carmoi; Gayle Carney; Inês Carqueja; Marie-Christine Carret; François Martin Carrier; Ida Carroll; Gail Carson; Leonor Carvalho; Maire-Laure Casanova; Mariana Cascão; Siobhan Casey; José Casimiro; Bailey Cassandra; Silvia Castañeda; Nidyanara Castanheira; Guylaine Castor-Alexandre; Henry Castrillón; Ivo Castro; Ana Catarino; François-Xavier Catherine; Paolo Cattaneo; Roberta Cavalin; Giulio Giovanni Cavalli; Alexandros Cavayas; Adrian Ceccato; Minerva Cervantes-Gonzalez; Muge Cevik; Anissa Chair; Catherine Chakveatze; Adrienne Chan; Meera Chand; Christelle Chantalat Auger; Jean-Marc Chapplain; Julie Chas; Allegra Chatterjee; Mobin Chaudry; Jonathan Samuel Chávez Iñiguez; Anjellica Chen; Yih-Sharng Chen; Matthew Pellan Cheng; Antoine Cheret; Alfredo Antonio Chetta; Thibault Chiarabini; Julian Chica; Suresh Kumar Chidambaram; Leong Chin Tho; Catherine Chirouze; Davide Chiumello; Hwa Jin Cho; Sung-Min Cho; Bernard Cholley; Danoy Chommanam; Marie-Charlotte Chopin; Yock Ping Chow; Ting Soo Chow; Nathaniel Christy; Hiu Jian Chua; Jonathan Chua; Jose Pedro Cidade; José Miguel Cisneros Herreros; Barbara Wanjiru Citarella; Anna Ciullo; Emma Clarke; Jennifer Clarke; Rolando Claire-Del Granado; Sara Clohisey; Perren J. Cobb; Cassidy Codan; Caitriona Cody; Alexandra Coelho; Megan Coles; Gwenhaël Colin; Michael Collins; Se-

bastiano Maria Colombo; Pamela Combs; Marie Connor; Anne Conrad; Sofia Contreras; Elaine Conway; Graham S. Cooke; Mary Copland; Hugues Cordel; Amanda Corley; Sabine Cornelis; Alexander Daniel Cornet; Arianne Joy Corpuz; Andrea Cortegiani; Grégory Corvaisier; Emma Costigan; Camille Couffignal; Sandrine Couffin-Cadiergues; Roxane Courtois; Stéphanie Cousse; Rachel Cregan; Charles Crepy D'Orleans; Sabine Croonen; Gloria Crawl; Jonathan Crump; Claudina Cruz; Juan Luis Cruz Berm; Jaime Cruz Rojo; Marc Csete; Alberto Cucino; Ailbhe Cullen; Matthew Cummings; Gerard Curley; Elodie Curlier; Colleen Curran; Paula Custodio; Ana da Silva Filipe; Charlene Da Silveira; Al-Awwab Dabaliz; Andrew Dagens; John Arne Dahl; Darren Dahly; Heidi Dalton; Jo Dalton; Seamus Daly; Federico D'Amico; Nick Dane-man; Corinne Daniel; Emmanuelle A Dankwa; Jorge Dantas; Frédéric D'Aragon; Mark de Boer; Gillian de Loughry; Diego de Mendoza; Etienne De Montmollin; Rafael Freitas de Oliveira França; Ana Isabel de Pinho Oliveira; Rosanna De Rosa; Cristina De Rose; Thushan de Silva; Peter de Vries; Jillian Deacon; David Dean; Alexa Debard; Marie-Pierre Debray; Nathalie DeCastro; William Dechert; Lauren Deconninck; Romain Decours; Eve Defous; Isabelle Delacroix; Eric Delaveuve; Karen Delavigne; Nathalie M. Delfos; Ionna Deligiannis; Andrea Dell'Amore; Christelle Delmas; Pierre Delobel; Corine Delsing; Elisa Demonchy; Emmanuelle Denis; Dominique Deplanque; Pieter Depuydt; Mehul Desai; Diane Descamps; Mathilde Desvallées; Santi Dewayanti; Pathik Dhangar; Alpha Diallo; Sylvain Diamantis; André Dias; Andrea Dias; Rodrigo Diaz; Juan Jose Diaz; Priscila Diaz; Kévin Didier; Jean-Luc Diehl; Wim Dieperink; Jérôme Dimet; Vincent Dinot; Fara Diop; Alphonsine Diouf; Yael Dishon; Félix Djossou; Annemarie B. Docherty; Helen Doherty; Arjen M Dondorp; Andy Dong; Christl A. Donnelly; Maria Donnelly; Chloe Donohue; Yoann Donohue; Sean Donohue; Peter Doran; Céline Dorival; Eric D'Ortenzio; Phouvieng Douangdala; James Joshua Douglas; Renee Douma; Nathalie Dournon; Triona Downer; Joanne Downey; Mark Downing; Tom Drake; Aoife Driscoll; Amiel A. Dror; Murray Dryden; Murray Dryden; Claudio Duarte Fonseca; Vincent Dube; François Dubos; Audrey Dubot-Pérès; Alexandre Ducancelle; Toni Duculan; Susanne Dudman; Abhijit Duggal; Paul Dunand; Jake Dunning; Mathilde Duplaix; Emanuele Durante-Mangoni; Lucian Durham III; Bertrand Dussol; Juliette Duthoit; Xavier Duval; Anne Margarita Dyrhol-Riise; Sim Choon Ean; Marco Echeverria-Villalobos; Giorgio Economopoulos; Michael Edelstein; Siobhan Egan; Linn Margrete Eggesbø; Carla Eira; Mohammed El Sanharawi; Subbarao Elapavaluru; Brigitte Elharrar; Natalie Elkheir; Jacobien Ellerbroek; Merete Ellingjord-Dale; Philippine Eloy; Tarek Elshazly; Iqbal Elyazar; Isabelle Enderle; Tomoyuki Endo; Chan Chee Eng; Ilka Engelmann; Vincent Enouf; Olivier Epaulard; Martina Escher; Mariano Esperatti; Hélène Esperou; Marina Esposito-Farese; João Estevão; Manuel Etienne; Long COVID India Etienne; Nadia Ettalhaoui; Anna Greti Everding; Mirjam Evers; Isabelle Fabre; Marc Fabre; Amna Faheem; Arabella Fahy; Cameron J. Fairfield; Zul Fakar; Komal Fareed; Pedro Faria; Ahmed Farooq; Hanan Fateena; Arie Zainul Fatoni; Karine Faure; Raphaël Favory; Mohamed Fayed; Niamh Feely; Laura Feeney; Luis Felipe Reyes; Jorge Fernandes; Marília Andreia Fernandes; Susana Fernandes; François-Xavier Ferrand; Eglantine Ferrand Devouge; Joana Ferrão; Carlo Ferrari; Mário Ferraz; Benigno Ferreira; Isabel Ferreira; Sílvia Ferreira; Ricard Ferrer-Roca; Nicolas Ferriere; Céline Ficko; Claudia Figueiredo-Mello; William Finlayson; Juan Fiorda; Thomas Flament; Clara Flateau; Tom Fletcher; Letizia Lucia Florio; Brigid Flynn; Deirdre Flynn; Federica Fogliazza; Claire Foley; Jean Foley; Victor Fomin; Tatiana Fonseca; Patricia Fontela; Simon Forsyth; Denise Foster; Giuseppe Foti; Erwan Fourn; Robert A. Fowler; Marianne Fraher; Diego Franch-Llasat; Christophe Fraser; John F Fraser; Marcela Vieira Freire; Ana Freitas Ribeiro; Caren Friedrich; Ricardo Fritz; Stéphanie Fry; Nora Fuentes; Masahiro Fukuda; Argin G; Valérie Gaborieau; Rostane Gaci; Massimo Gagliardi; Jean-Charles Gagnard; Nathalie Gagné; Amandine Gagneux-Brunon; Sérgio Gaião; Linda Gail Skeie; Phil Gallagher; Elena Gallego Curto; Carrol Gamble; Aysylu Gamirova; Yasmin Gani; Arthur Garan; Rebekha Garcia; Noelia García Barrio; Julia Garcia-Diaz; Esteban Garcia-Gallo; Navya Garimella; Federica Garofalo; Denis Garot; Valérie Garrait; Basanta Gauli; Nathalie Gault; Aisling Gavin; Anatoliy Gavrylov; Alexandre Gay-mard; Johannes Gebauer; Eva Geraud; Louis Gerbaud Morlaes; Nuno Germano; praveen kumar ghisulal; Jade Ghosn; Marco Giani; Carlo Giaquinto; Jess Gibson; Tristan Gigante; Morgane Gilg; Elaine Gilroy; Guillermo Giordano; Michelle Girvan; Valérie Gissot; Jesse Gitaka; Gezy Giwangkancana; Daniel Glikman; Petr Glybochko; Eric Gnull; Geraldine Goco; François Goehringer; Siri Goepel; Jean-Christophe Goffard; Jin Yi Goh; Jonathan Golob; Rui Gomes; Kyle Gomez; Joan Gómez-Junyent; Marie Gominet; Bronner P. Gonçalves; Alicia Gonzalez; Patricia Gordon; Yanay Gorelik; Isabelle Gorenne; Laure Goubert; Cécile Goujard; Tiphaine Goulenok; Margarite Grable; Jeronimo Graf; Edward Wilson Grandin; Pascal Granier; Giacomo Grasselli; Lorenzo Grazioli; Christopher A. Green; Courtney Greene; William Greenhalf; Segolène Greffe; Domenico Luca Grieco; Matthew Griffee; Fiona Griffiths; Ioana Grigoras; Albert Groenendijk; Anja

Grosse Lordemann; Heidi Gruner; Yusing Gu; Fabio Guarracino; Jérémie Guedj; Martin Guego; Dewi Guellec; Anne-Marie Guerguerian; Daniela Guerreiro; Romain Guery; Anne Guillaumot; Laurent Guillemainault; Maisa Guimarães de Castro; Thomas Guimard; Marieke Haalboom; Daniel Haber; Hannah Habraken; Ali Hachemi; Amy Hackmann; Nadir Hadri; Fakhir Haidri; Sheeba Hakak; Adam Hall; Matthew Hall; Sophie Halpin; Jawad Hameed; Ansley Hamer; Raph L. Hamers; Rebecca Hamidfar; Bato Hammarström; Terese Hammond; Lim Yuen Han; Rashan Haniffa; Kok Wei Hao; Hayley Hardwick; Ewen M. Harrison; Janet Harrison; Samuel Bernard Ekow Harrison; Alan Hartman; Mohd Shahnaz Hasan; Junaid Hashmi; Madiha Hashmi; Claire Hastie; Muhammad Hayat; Ailbhe Hayes; Leanne Hays; Jan Heerman; Lars Heggelund; Ross Hendry; Martina Hennessy; Aquiles Henriquez-Trujillo; Maxime Hentzien; Jaime Hernandez-Montfort; Daniel Herr; Andrew Hershey; Liv Hesstvedt; Astarini Hidayah; Eibhilin Higgins; Dawn Higgins; Rupert Higgins; Rita Hinchion; Samuel Hinton; Hiroaki Hiraiwa; Haider Hirkani; Hikombo Hitoto; Antonia Ho; Yi Bin Ho; Alexandre Hoctin; Isabelle Hoffmann; Wei Han Hoh; Oscar Hoiting; Rebecca Holt; Jan Cato Holter; Peter Horby; Juan Pablo Horcajada; Koji Hoshino; Kota Hoshino; Ikram Houas; Catherine L. Hough; Stuart Houltham; Jimmy Ming-Yang Hsu; Jean-Sébastien Hulot; Stella Huo; Abby Hurd; Iqbal Hussain; Samreen Ijaz; Hajnal-Gabriela Illes; Patrick Imbert; Mohammad Imran; Rana Imran Sikander; Aftab Imtiaz; Hugo Inácio; Carmen Infante Dominguez; Yun Sii Ing; Elias Iosifidis; Mariachiara Ippolito; Sarah Isgett; Tiago Isidoro; Nadiah Ismail; Margaux Isnard; Mette Stausland Istre; Junji Itai; Asami Ito; Daniel Ivulich; Danielle Jaafar; Salma Jaafoura; Julien Jabot; Clare Jackson; Nina Jamieson; Pierre Jaquet; Waasila Jassat; Coline Jaud-Fischer; Stéphane Jaureguiberry; Jeffrey Javidfar; Denise Jaworsky; Florence Jego; Anilawati Mat Jelani; Synne Jenum; Edwin Jesudason; Ruth Jimbo-Sotomayor; Ong Yiaw Joe; Ruth N. Jorge García; Silje Bakken Jørgensen; Cédric Joseph; Mark Joseph; Swosti Joshi; Mercé Jourdain; Philippe Jovet; Jennifer June; Anna Jung; Hanna Jung; Dafsah Juzar; Ouifiya Kafif; Florentia Kaguelidou; Neerusha Kaisbain; Thavamany Kaleesvran; Sabina Kali; Alina Kalicinska; Karl Trygve Kalleberg; Smaragdi Kalomoiri; Muhammad Aisar Ayadi Kamaluddin; Zul Amali Che Kamaruddin; Nadiah Kamarudin; Kavita Kamini; Darshana Hewa Kandamby; Chris Kandel; Kong Yeow Kang; Darakhshan Kanwal; Dyah Kanyawati; Valentina Kapustina; Pratap Karpayah; Todd Karsies; Christiana Kartsonaki; Daisuke Kasugai; Anant Kataria; Kevin Katz; Aasmine Kaur; Tatsuya Kawasaki; Christy Kay; Hannah Keane; Seán Keating; Pulak Kedia; Andrea Kelly; Aoife Kelly; Claire Kelly; Niamh Kelly; Sadie Kelly; Yvelynne Kelly; Maeve Kelsey; Ryan Kennedy; Kalynn Kennon; Sommay Keomany; Maeve Kernan; Younes Kerroumi; Sharma Keshav; Evelyne Kestelyn; Osama Khalid; Imrana Khalid; Antoine Khalil; Coralie Khan; Irfan Khan; Quratul Ain Khan; Sushil Khanal; Abid Khatak; Amin Khawaja; Krish Kherajani; Michelle E Kho; Denisa Khoo; Ryan Khoo; Saye Khoo; Nasir Khoso; Khor How Kiat; Yuri Kida; Harrison Kihuga; Peter Kiiza; Beathe Kiland Granerud; Anders Benjamin Kildal; Jae Burm Kim; Antoine Kimmoun; Detlef Kindgen-Milles; Alexander King; Nobuya Kitamura; Eyrun Floercke Kjetland Kjetland; Paul Klenerman; Rob Klont; Gry Kloumann Bekken; Stephen R Knight; Robin Kobbe; Chamira Kodippily; Malte Kohns Vasconcelos; Sabin Koirala; Mamoru Komatsu; ISARIC Collaborator Korten; Volkan Korten; Caroline Kosgei; Arsène Kpangon; Karolina Krawczyk; Vinothini Krishnan; Sudhir Krishnan; Oksana Kruglova; Deepali Kumar; Ganesh Kumar; Mukesh Kumar; Pavan Kumar Vecham; Dinesh Kuriakose; Ethan Kurtzman; Neurinda Permata Kusumastuti; Demetrios Kutsogiannis; Galyna Kutsyna; Konstantinos Kyriakoulis; Marie Lachatre; Marie Lacoste; John G. Laffey; Marie Lagrange; Fabrice Laine; Olivier Lairez; Sanjay Lakhey; Sulaiman Lakoh; Antonio Lalueza; Marc Lambert; François Lamontagne; Marie Langelot-Richard; Vincent Langlois; Eka Yudha Lantang; Marina Lanza; Cédric Laouénan; Samira Laribi; Delphine Lariviere; Stéphane Lasry; Sakshi Lath; Naveed Latif; Odile Launay; Didier Laureillard; Yoan Lavie-Badie; Andy Law; Cassie Lawrence; Teresa Lawrence; Minh Le; Clément Le Bihan; Cyril Le Bris; Georges Le Falher; Lucie Le Fevre; Quentin Le Hingrat; Marion Le Maréchal; Soizic Le Mestre; Gwenaél Le Moal; Vincent Le Moing; Hervé Le Nagard; Paul Le Turnier; Ema Leal; Marta Leal Santos; Biing Horng Lee; Heng Gee Lee; Su Hwan Lee; James Lee; Jennifer Lee; Todd C. Lee; Yi Lin Lee; Gary Leeming; Bénédicte Lefebvre; Laurent Lefebvre; Benjamin Lefevre; Sylvie LeGac; Jean-Daniel Lelievre; François Lellouche; Adrien Lemaigen; Véronique Lemee; Anthony Lemeur; Gretchen Lemmink; Ha Sha Lene; Jenny Lennon; Rafael León; Marc Leone; Michela Leone; Quentin Lepiller; François-Xavier Lescure; Olivier Lesens; Mathieu Lesouhaitier; Amy Lester-Grant; Andrew Letizia; Bruno Levy; Yves Levy; Claire Levy-Marchal; Katarzyna Lewandowska; Erwan L'Her; Gianluigi Li Bassi; Janet Liang; Ali Liaquat; Geoffrey Liegeon; Kah Chuan Lim; Wei Shen Lim; Chantre Lima; Bruno Lina; Lim Lina; Andreas Lind; Maja Katherine Lingad; Guillaume Lingas; Sylvie Lion-Daolio; Samantha Lissauer; Keibun Liu; Marine Livrozet; Patricia Lizotte; Antonio Loforte; Navy Lolong; Leong Chee Loon;

Diogo Lopes; Dalia Lopez-Colon; Anthony L. Loschner; Paul Loubet; Bouchra Loufti; Guillame Louis; Silvia Lourenco; Lara Lovelace-Macon; Lee Lee Low; David Lowe; Marije Lowik; Jia Shyi Loy; Jean Christophe Lucet; Carlos Lumbreras Bermejo; Carlos M. Luna; Olguta Lungu; Liem Luong; Nestor Luque; Dominique Luton; Ruth Lyons; Olavi Maasikas; Oryane Mabilia; Sarah MacDonald; Moïse Machado; Gabriel Macheda; Juan Macias Sanchez; Jai Madhok; Guillermo Maestro de la Calle; Jacob Magara; Giuseppe Maglietta; Rafael Mahieu; Sophie Mahy; Ana Raquel Maia; Lars S. Maier; Mylène Maillet; Thomas Maitre; Maria Majori; Maximilian Malferttheiner; Nadia Malik; Paddy Mallon; Fernando Maltez; Denis Malvy; Patrizia Mammi; Victoria Manda; Jose M. Mandei; Laurent Mandelbrot; Frank Manetta; Julie Mankikian; Edmund Manning; Aldric Manuel; Ceila Maria Sant'Ana Malaque; Daniel Marino; Flávio Marino; Samuel Markowicz; Charbel Maroun Eid; Ana Marques; Catherine Marquis; Brian Marsh; Laura Marsh; Megan Marshal; John Marshall; Celina Turchi Martelli; Dori-Ann Martin; Emily Martin; Guillaume Martin-Blondel; Alessandra Martinelli; Ignacio Martin-Loeches; Martin Martinot; Alejandro Martin-Quiros; Ana Martins; João Martins; Nuno Martins; Caroline Martins Rego; Gennaro Martucci; Olga Martynenko; Eva Miranda Marwali; Marsilla Marzukie; Juan Fernando Masa Jimenez; David Maslove; Phillip Mason; Sabina Mason; Sobia Masood; Basri Mat Nor; Moshe Matan; Henrique Mateus Fernandes; Meghena Mathew; Daniel Mathieu; Mathieu Mattei; Romans Matulevics; Laurence Maulin; Michael Maxwell; Javier Maynar; Mayfong Mayxay; Thierry Mazzoni; Natalie Mc Evoy; Lisa Mc Sweeney; Colin McArthur; Colin McArthur; Aine McCarthy; Anne McCarthy; Colin McCloskey; Rachael McConnochie; Sherry McDermott; Sarah E. McDonald; Aine McElroy; Samuel McElwee; Victoria McEneaney; Allison McGeer; Chris McKay; Johnny McKeown; Kenneth A. McLean; Paul McNally; Bairbre McNicholas; Elaine McPartlan; Edel Meaney; Cécile Mear-Passard; Maggie Mechlin; Maqsood Meher; Omar Mehkri; Ferruccio Mele; Luis Melo; Kashif Memon; Joao Joao Mendes; Ogechukwu Menkiti; Kusum Menon; France Mentré; Alexander J. Mentzer; Emmanuelle Mercier; Noémie Mercier; Antoine Merckx; Mayka Mergeay-Fabre; Blake Mergler; Laura Merson; Tiziana Meschi; António Mesquita; Roberta Meta; Osama Metwally; Agnès Meybeck; Dan Meyer; Alison M. Meynert; Vanina Meysonnier; Amina Meziane; Mehdi Mezidi; Giuliano Michelagnoli; Céline Michelanglei; Isabelle Michelet; Efstathia Mihelis; Vladislav Mihnovit; Hugo Miranda-Maldonado; Nor Arisah Misnan; Nik Nur Eliza Mohamed; Tahira Jamal Mohamed; Asma Moin; David Molina; Elena Molinos; Brenda Molloy; Mary Mone; Agostinho Monteiro; Claudia Montes; Giorgia Montrucchio; Sarah Moore; Shona C. Moore; Lina Morales Cely; Lucia Moro; Diego Rolando Morocho Tutillo; Ben Morton; Catherine Motherway; Ana Motos; Hugo Mouquet; Clara Mouton Perrot; Julien Moyet; Caroline Mudara; Aisha Kalsoom Mufti; Ng Yong Muh; Dzawani Muhamad; Jimmy Mullaert; Fredrik Müller; Karl Erik Müller; Daniel Munblit; Syed Muneeb; Nadeem Munir; Laveena Munshi; Aisling Murphy; Aisling Murphy; Lorna Murphy; Marlène Murriss; Srinivas Murthy; Himed Musaab; Carlotta Mutti; Himasha Muvindi; Gugapriyaa Muiyandy; Dimitra Melia Myrodi; Farah Nadia Mohd-Hanafiah; Dave Nagpal; Alex Nagrebetsky; Mangala Narasimhan; Nageswaran Narayanan; Rashid Nasim Khan; Alasdair Nazerali-Maitland; Nadège Neant; Holger Neb; Coca Necsoi; Nikita Nekliudov; Erni Nelwan; Raul Neto; Emily Neumann; Bernardo Neves; Wing Yiu Ng; Pauline Yeung Ng; Anthony Nghi; Jane Ngure; Duc Nguyen; Orna Ni Choileain; Niamh Ni Leathlobhair; Alistair Nichol; Prompak Nitayavardhana; Stephanie Nonas; Nurul Amani Mohd Noordin; Marion Noret; Nurul Faten Izzati Norharizam; Lisa Norman; Alessandra Notari; Mahdad Noursadeghi; Karolina Nowicka; Adam Nowinski; Saad Nseir; Jose I Nunez; Nurnaningsih Nurnaningsih; Dwi Utomo Nusantara; Elsa Nyamankolly; Anders Benteson Nygaard; Fionnuala O'Brien; Annmarie O'Callaghan; Annmarie O'Callaghan; Giovanna Occhipinti; Derbrenn O'Connor; Max O'Donnell; Tawnya Ogston; Takayuki Ogura; Tak-Hyuk Oh; Sophie O'Halloran; Katie O'Hearn; Shinichiro Ohshimo; Agnieszka Oldakowska; João Oliveira; Larissa Oliveira; Piero L. Olliaro; Conar O'Neil; David S.Y. Ong; Jee Yan Ong; Wilna Oosthuizen; Anne Opavsky; Peter Openshaw; Saijad Orakzai; Claudia Milena Orozco-Chamorro; Andrés Orquera; Jamel Ortoleva; Javier Osatnik; Linda O'Shea; Miriam O'Sullivan; Siti Zubaidah Othman; Paul Otiku; Nadia Ouamara; Rachida Ouissa; Clark Owyang; Eric Oziol; Maïder Pagadoy; Justine Pages; Amanda Palacios; Mario Palacios; Massimo Palmarini; Carlo Palmieri; Giovanna Panarello; Prasan Kumar Panda; Hem Paneru; Lai Hui Pang; Mauro Panigada; Nathalie Pansu; Aurélie Papadopoulos; Paolo Parducci; Edwin Fernando Paredes Oña; Rachael Parke; Melissa Parker; Briseida Parra; Vieri Parrini; Taha Pasha; Jérémie Pasquier; Bruno Pastene; Fabian Patauner; Drashti Patel; Mohan Dass Pathmanathan; Luís Patrão; Patricia Patricio; Juliette Patrier; Laura Patrizi; Lisa Patterson; Rajyabardhan Pattnaik; Christelle Paul; Mical Paul; Ellen Pauley; Jorge Paulos; William A. Paxton; Jean-François Payen; Kalaiarasu Peariasamy; Miguel Pedrera Jiménez; Giles J. Peek; Florent Peelman; Nathan Peiffer-Smadja; Vincent Peigne; Mare Pejkovska; Jill Pell; Paolo Pelosi; Ithan D. Peltan; Rui Pereira; Daniel Perez; Luis Periel; Thomas



Perpoint; Antonio Pesenti; Vincent Pestre; Lenka Petrou; Michele Petrovic; Ventzislava Petrov-Sanchez; Frank Olav Pettersen; Gilles Peytavin; Scott Pharand; Ooyanong Phonemixay; Michael Piagnerelli; Walter Picard; Olivier Picone; Maria de Piero; Carola Pierobon; Djura Piersma; Carlos Pimentel; Raquel Pinto; Catarina Pires; Isabelle Pironneau; Lionel Piroth; Roberta Pisi; Ayodhia Pitaloka; Riinu Pius; Simone Piva; Laurent Plantier; Hon Shen Png; Julien Poissy; Ryadh Pokeerbux; Maria Pokorska-Spiewak; Sergio Poli; Georgios Pollakis; Diane Ponscarne; Jolanta Popielska; Diego Bastos Porto; Andra-Maris Post; Douwe F. Postma; Pedro Pova; Diana Póvoas; Jeff Powis; Sofia Prapa; Viladeth Praphasiri; Sébastien Preau; Christian Prebensen; Jean-Charles Preiser; Anton Prinssen; Mark G. Pritchard; Gamage Dona Dilanthi Priyadarshani; Lucia Proença; Sravya Pudota; Oriane Puéchal; Bambang Pujo Semedi; Mathew Pulicken; Matteo Puntoni; Gregory Purcell; Luisa Quesada; Vilmaris Quinones-Cardona; Víctor Quirós González; Else Quist-Paulsen; Mohammed Quraishi; Maia Rabaa; Christian Rabaud; Ebenezer Rabindrarajan; Aldo Rafael; Marie Rafiq; Gabrielle Ragazzo; Mutia Rahardjani; Ahmad Kashfi Haji Ab Rahman; Rozanah Abd Rahman; Arsalan Rahutullah; Fernando Rainieri; Giri Shan Rajahram; Pratheema Ramachandran; Nagarajan Ramakrishnan; Kollengode Ramanathan; Ahmad Afiq Ramli; Blandine Rammaert; Grazielle Viana Ramos; Anais Rampello; Asim Rana; RAJAVARDHAN RANGAPPA; Ritika Ranjan; Elena Ranza; Christophe Rapp; Aasiyah Rashan; Thalha Rashan; Ghulam Rasheed; Menaldi Rasmin; Indrek Rätsep; Cornelius Rau; Francesco Rausa; Tharmini Ravi; Ali Raza; Andre Real; Stanislas Rebaudet; Sarah Redl; Brenda Reeve; Attaur Rehman; Liadain Reid; Liadain Reid; Dag Henrik Reikvam; Renato Reis; Jordi Rello; Jonathan Remppis; Martine Remy; Hongru Ren; Hanna Renk; Anne-Sophie Resseguier; Matthieu Revest; Oleksa Rewa; Luis Felipe Reyes; Tiago Reyes; Maria Ines Ribeiro; Antonia Ricchiuto; David Richardson; Denise Richardson; Laurent Richier; Siti Nurul Atikah Ahmad Ridzuan; Jordi Riera; Ana L Rios; Asgar Rishu; Patrick Rispal; Karine Risso; Maria Angelica Rivera Nuñez; Nicholas Rizer; Chiara Robba; André Roberto; Stephanie Roberts; David L. Robertson; Olivier Robineau; Ferran Roche-Campo; Paola Rodari; Simão Rodeia; Julia Rodriguez Abreu; Bernhard Roessler; Claire Roger; Pierre-Marie Roger; Emmanuel Roilides; Amanda Rojek; Juliette Romaru; Roberto Roncon-Albuquerque Jr; Mélanie Roriz; Manuel Rosa-Calatrava; Michael Rose; Dorothea Rosenberger; Nurul Hidayah Mohammad Roslan; Andrea Rossanese; Matteo Rossetti; Sandra Rossi; Bénédicte Rossignol; Patrick Rossignol; Stella Rousset; Carine Roy; Benoît Roze; Desy Rusmawatiningtyas; Clark D. Russell; Maria Ryan; Maeve Ryan; Steffi Ryckaert; Aleksander Rygh Holten; Isabela Saba; Luca Sacchelli; Sairah Sadaf; Musharaf Sadat; Valla Sahraei; Maximilien Saint-Gilles; Pranya Sakiyalak; Nawal Salahuddin; Leonardo Salazar; Jodat Saleem; Nazal Saleh; Gabriele Sales; Stéphane Sallaberry; Charlotte Salmon Gandonniere; Hélène Salvator; Olivier Sanchez; Xavier Sánchez Choez; Kizy Sanchez de Oliveira; Angel Sanchez-Miralles; Vanessa Sancho-Shimizu; Gyan Sandhu; Zulfiqar Sandhu; Pierre-François Sandrine; Oana Sandulescu; Marlene Santos; Shirley Sarfo-Mensah; Bruno Sarmiento Banheiro; Iam Claire E. Sarmiento; Benjamine Sarton; Ankana Satya; Sree Satyapriya; Rumaisah Satyawati; Egle Saviciute; Parthena Savvidou; Yen Tsen Saw; Justin Schaffer; Tjard Schermer; Arnaud Scherpereel; Marion Schneider; Stephan Schroll; Michael Schwameis; Gary Schwartz; Janet T. Scott; James Scott-Brown; Nicholas Sedillot; Tamara Seitz; Jaganathan Selvanayagam; Mageswari Selvarajoo; Caroline Semaille; Malcolm G. Semple; Rasidah Bt Senian; Eric Senneville; Claudia Sepulveda; Filipa Sequeira; Tânia Sequeira; Ary Serpa Neto; Pablo Serrano Balazote; Ellen Shadowitz; Syamin Asyraf Shahidan; Mohammad Shamsah; Anuraj Shankar; Shaikh Sharjeel; Pratima Sharma; Catherine A. Shaw; Victoria Shaw; Ashraf Sheharyar; Dr. Rajesh Mohan Shetty; Rohan Shetty; Haixia Shi; Nisreen Shiban; Mohiuddin Shiekh; Takuya Shiga; Anastasia Shikhaleva; Nobuaki Shime; Hiroaki Shimizu; Keiki Shimizu; Naoki Shimizu; Sally Shrapnel; Shubha Kalyan Shrestha; Pramesh Sundar Shrestha; Hoi Ping Shum; Nassima Si Mohammed; Ng Yong Siang; Jeanne Sibiude; Bountoy Sibounheuang; Atif Siddiqui; Louise Sigfrid; Louise Sigfrid; Piret Sillaots; Catarina Silva; Maria Joao Silva; Rogério Silva; Benedict Sim Lim Heng; Wai Ching Sin; Dario Sinatti; Girish Sindhvani; Budha Charan Singh; Punam Singh; Pompini Agustina Sitompul; Karisha Sivam; Vegard Skogen; Sue Smith; Benjamin Smood; Coilin Smyth; Michelle Smyth; Michelle Smyth; Morgane Snacken; Dominic So; Tze Vee Soh; Lene Bergendal Solberg; Joshua Solomon; Tom Solomon; Emily Somers; Agnès Sommet; Myung Jin Song; Rima Song; Tae Song; Jack Song Chia; Michael Sonntagsbauer; Azlan Mat Soom; Arne Søråas; Camilla Lund Søråas; Alberto Sotto; Edouard Soum; Ana Chora Sousa; Marta Sousa; Maria Sousa Uva; Vicente Souza-Dantas; Alexandra Sperry; Elisabetta Spinuzza; Ekaterina Spiridonova; B. P. Sanka Ruwan Sri Darshana; Shiranee Sriskandan; Sarah Stabler; Thomas Staudinger; Stephanie-Susanne Stecher; Trude Steinsvik; Ymkje Stienstra; Birgitte Stiksrud; Eva Stolz; Amy Stone; Anca Streinu-Cercel; Adrian Streinu-Cercel; Ami Stuart; David Stuart; Decy Subekti; Gabriel Suen; Jacky Y. Suen; Asfia Sultana; Char-

lotte Summers; Dubravka Supic; Deepashankari Suppiah; Magdalena Surovcová; Suwarti Suwarti; Andrey Svistunov; Sarah Syahrin; Konstantinos Syrigos; Jaques Sztajnbock; Konstanty Szuldrzynski; Shirin Tabrizi; Fabio S. Taccone; Lysa Taghersset; Shahdattul Mawarni Taib; Ewa Talarek; Sara Taleb; Jelmer Talsma; Renaud Tamisier; Maria Lawrensia Tampubolon; Le Van Tan; Kim Keat Tan; Yan Chyi Tan; Clarice Tanaka; Hiroyuki Tanaka; Taku Tanaka; Hayato Taniguchi; Huda Taqdees; Arshad Taqi; Coralie Tardivon; Pierre Tattevin; M Azhari Taufik; Hassan Tawfik; Richard S. Tedder; Tze Yuan Tee; João Teixeira; Sofia Tejada; Marie-Capucine Tellier; Sze Kye Teoh; Vanessa Teotonio; François Téoulé; Pleun Terpstra; Olivier Terrier; Nicolas Terzi; Hubert Tessier-Grenier; Adrian Tey; Alif Adlan Mohd Thabit; Anand Thakur; Zhang Duan Tham; Suvintheran Thangavelu; Vincent Thibault; Simon-Djamel Thiberville; Benoît Thill; Jananee Thirumanickam; Shaun Thompson; Emma C. Thomson; David Thomson; Surain Raaj Thanga Thurai; Duong Bich Thuy; Ryan S. Thwaites; Andrea Ticinesi; Paul Tierney; Vadim Tieroshyn; Peter S Timashev; Jean-François Timsit; Bharath Kumar Tirupakuzhi Vijayaraghavan; Noémie Tissot; Jordan Zhien Yang Toh; Maria Toki; Kristian Tonby; Sia Loong Tonnii; Antoni Torres; Margarida Torres; Rosario Maria Torres Santos-Olmo; Hernando Torres-Zevallos; Michael Towers; Tony Trapani; Théo Treoux; Huynh Trung Trieu; Cécile Tromeur; Ioannis Trontzas; Tiffany Trouillon; Jeanne Truong; Christelle Tual; Sarah Tubiana; Helen Tuite; Jean-Marie Turmel; Lance C.W. Turtle; Anders Tveita; Pawel Twardowski; Makoto Uchiyama; PG Ishara Udayanga; Andrew Udy; Roman Ullrich; Alberto Uribe; Asad Usman; Timothy M. Uyeki; Cristinava Vajdovics; Piero Valentini; Luís Val-Flores; Ana Luiza Valle; Amélie Valran; Ilaria Valzano; Stijn Van de Velde; Marcel van den Berge; Machteld Van der Feltz; Job van der Palen; Paul van der Valk; Nicky Van Der Vekens; Peter Van der Voort; Sylvie Van Der Werf; Marlice van Dyk; Laura van Gulik; Jarne Van Hattem; Carolien van Netten; Gitte Van Twillert; Ilonka van Veen; Noémie Vanel; Henk Vanoverschelde; Pooja Varghese; Michael Varrone; Shoban Raj Vasudayan; Charline Vauchy; Shaminee Veeran; Aurélie Veislinger; Sebastian Vencken; Sara Ventura; Annelies Verbon; James Vickers; José Ernesto Vidal; César Vieira; Deepak Vijayan; Joy Ann Villanueva; Judit Villar; Pierre-Marc Villeneuve; Andrea Villoldo; Nguyen Van Vinh Chau; Gayatri Vishwanathan; Benoit Visseaux; Hannah Visser; Chiara Vitiello; Manivanh Vongsouvath; Harald Vonkeman; Fanny Vuotto; Suhaila Abdul Wahab; Nadirah Abdul Wahid; Marina Wainstein; Wan Fadzlina Wan Muhd Shukeri; Noor Hidayu Wahab; Chih-Hsien Wang; Steve Webb; Jia Wei; Katharina Weil; Tan Pei Wen; Sanne Wesselius; T. Eoin West; Murray Wham; Bryan Whelan; Nicole White; Paul Henri Wicky; Aurélie Wiedemann; Surya Otto Wijaya; Keith Wille; Suzette Willems; Virginie Williams; Evert-Jan Wils; Calvin Wong; Xin Ci Wong; Yew Sing Wong; Teck Fung Wong; Natalie Wright; Gan Ee Xian; Lim Saio Xian; Kuan Pei Xuan; Ioannis Xynogalas; Sophie Yacoub; Siti Rohani Binti Mohd Yakop; Masaki Yamazaki; Yazdan Yazdanpanah; Nicholas Yee Liang Hing; Cécile Yelnik; Chian Hui Yeoh; Stephanie Yerkovich; Touxiang Yiaye; Toshiki Yokoyama; Hodane Yonis; Obada Yousif; Saptadi Yuliarto; Akram Zaaqoq; Marion Zabbe; Kai Zacharowski; Masliza Zahid; Maram Zahran; Nor Zaila Binti Zaidan; Maria Zambon; Miguel Zambrano; Alberto Zanella; Konrad Zawadka; Nurul Zaynah; Hiba Zayyad; Alexander Zoufaly; David Zucman; Mazankowski Heart Institute; The Western Australian COVID-19 Research Response.

## Contributing Sites

### Argentina

Clínica Pasteur, Neuquén; Hospital Aleman, Buenos Aires; Hospital de Clínicas, Buenos Aires; Mar del Plata Medical Foundation Private Community Hospital, Mar Del Plata; Hospital de Niños Sor María Ludovica, La Plata; Hospital de Pediatría Juan P. Garrahan, Buenos Aires; Hospital Municipal de Agudos Leonidas Lucero, Bahía Blanca; Hospital Nacional Profesor A. Posadas, Buenos Aires.

### Australia

Albury Wodonga Health, Albury; Alice Springs Hospital, Alice Springs; Angliss Hospital, Melbourne; Austin Hospital, Melbourne; Ballarat Base Hospital, Ballarat; Bankstown-Lidcombe Hospital, Bankstown; Barwon Health, Geelong; Bendigo Hospital, Bendigo; Box Hill Hospital, Melbourne; Bunbury Hospital, Bunbury; Bundaberg Hospital, Bundaberg; Caboolture Hospital, Caboolture; Cabrini Hospital, Melbourne; Cairns Hospital, Cairns; Calvary Mater Hospital, Newcastle; Campbelltown Hospital, Campbelltown; Canberra Hospital, Canberra; Casey Hospital, Melbourne; Concord Hospital, Sydney; Dandenong Hospital, Melbourne; Epworth Hospital, Melbourne; Flinders Medical Centre, Adelaide; Footscray Hospital, Melbourne; Frankston Hospital, Melbourne; Gold Coast University Hospital, Gold Coast; Hervey Bay Hospital, Hervey Bay; Ipswich Hospital, Ipswich; John Hunter Hospital, New Lambton Heights; Joondalup Health Campus, Perth; Launceston General Hospital, Launceston; Lismore Base Hospital, Lismore; Liverpool Hospital, Liverpool; Logan Hospital, Logan; Lyell McEwan Hospital, Adelaide; Maroondah Hospital, Melbourne; Mater Misericordiae Brisbane, Brisbane; Mildura Base Hospital, Mildura; Monash Children's Hospital, Melbourne; Monash Medical Centre, Melbourne; Monash University, Melbourne; Nepean Hospital, Sydney; Northeast Health Wangaratta, Wangaratta; Northern Health, Melbourne; Perth Children's Hospital, Perth; Port Macquarie Base Hospital, Port Macquarie; Prince of Wales Hospital, Sydney; Princess Alexandra Hospital, Brisbane; Queensland Children's Hospital, Brisbane; Redcliffe Hospital, Redcliffe; Rockingham Hospital, Rockingham; Royal Adelaide Hospital, Adelaide; Royal Brisbane and Women's Hospital, Brisbane; Royal Children's Hospital, Melbourne; Royal Darwin Hospital, Darwin; Royal Hobart Hospital, Hobart; Royal Melbourne Hospital, Melbourne; Royal North Shore Hospital, Sydney; Royal Perth Hospital, Perth; Royal Prince Alfred Hospital, Sydney; Sir Charles Gairdner Hospital, Perth; St George Hospital, Sydney; St John of God Hospital, Perth; St John of God Hospital, Midland, Perth; St Vincent's Hospital, Melbourne; St. Vincent, Sydney; Sunshine Coast University Hospital, Sunshine Coast; Sunshine Hospital, Melbourne; Sydney Children's Hospital, Sydney; The Alfred Hospital, Melbourne; The Prince Charles Hospital, Brisbane; The Queen Elizabeth Hospital, Adelaide; Toowoomba Hospital, Toowoomba; University of Queensland, Brisbane; University of Western Australia/Fiona Stanley Hospital, Murdoch; Warrnambool, Warrnambool; Werribee Mercy Hospital, Werribee; Westmead Hospital, Sydney; Wollongong Hospital, Wollongong; Women's and Children's Hospital, Adelaide.

### Austria

Medical University of Vienna, Vienna; Sozialmedizinisches Zentrum Sud, Vienna.

### Bangladesh

NICVD Dhaka, Dhaka.

### Belgium

AZ Maria Middelaers, Gent; Civil Hospital Marie Curie, Charleroi; CUB-Hopital Erasme, Anderlecht; St-Pierre University Hospital, Brussels; Universitair Ziekenhuis, Gent.

### Bolivia

Caja Nacional De Salud, Trinidad; Hospital del Niño Manuel Ascencio Villarroel, Cochabamba; Hospital del Niño Dr. Ovidio Aliaga Uría, La Paz.

### Brazil

Centro de Pesquisa Aggeu Magalhães, Fiocruz, Recife; Complexo Hospitalar Dr. Clementino Fraga, João Pessoa city; Hospital das Clinicas da Faculdade de Medicina da Universidade de Sao Paulo, Sao Paulo;

Hospital de Amor, Sao Paulo; Hospital Escola da Universidade Federal de Pelotas, Pelotas; Hospital Naval Marcílio Dias, Rio De Janeiro; Hospital Sirio-Libanês, Sao Paulo; Hospital Universitário Clementino Fraga Filho, Rio de Janeiro; Instituto de Infectologia Emílio Ribas, Sao Paulo; Instituto do Coração da Universidade de São Paulo (INCOR), São Paulo; Mater Dei Hospital, Belo Horizonte; National Institute of Infectious Disease Evandro Chagas, Oswaldo Cruz Foundation (INI-FIOCRUZ), Ministry of Health, and D'Or Institute of Research and Education (IDOR), Rio de Janeiro; Sao Camilo Cura D'ars, Fortaleza.

### **Canada**

Alberta Children's Hospital, Calgary; BC Children's Hospital, Vancouver; Brantford General Hospital, Brantford; Centre hospitalier de l'université de Montréal, Montreal; Centre hospitalier Universitaire de Sherbrooke, Sherbrooke; Children's Hospital of Eastern Ontario, Ottawa; CISSS Chaudière-Appalaches; Foothills Medical Centre, Calgary; Grand River Hospital, Kitchener; Grande Prairie Queen Elizabeth II, Grande Prairie; Grey Nun's Community Hospital, Edmonton; Hôpital de l'Enfant-Jésus, Quebec; Hospital du Sacre Coeur, Montreal; Humber River Hospital, Toronto; Institut Universitaire de Cardiologie et de Pneumologie de Québec, Quebec City; Joseph Brant Hospital, Burlington; Kingston Health Sciences Centre, Kingston; Lions Gate Hospital, Vancouver; London Health Sciences Centre, London; Mazankowski Heart Institute, Edmonton; McGill University Health Centre, Montreal; McMaster University, Hamilton; Michael Garron Hospital, Toronto; Mills Memorial Hospital, Terrace; Misericordia Community Hospital, Edmonton; Mount Sinai Hospital, Toronto; Niagara Health, Niagara; North York General Hospital, Toronto; Red Deer Regional Hospital, Red Deer; Royal Alexandra Hospital, Edmonton; Royal Columbian Hospital, Vancouver; Sinai Health Systems, Toronto; St Joseph's Health Center, Sherbrooke; St. Boniface Hospital, Manitoba; St. Joseph's Healthcare Hamilton, Hamilton; Sturgeon Community Hospital, St Albert; Sunnybrook Health Sciences Centre, Toronto; The Centre hospitalier universitaire Sainte-Justine, Montreal; The Hospital for Sick Children (SickKids), Toronto; The Montreal Children's Hospital, Montreal; The Ottawa Hospital, Ottawa; Unity Health Toronto, Toronto; University Health Network, Toronto; University Hospital Northern British Columbia, Prince George; University Institute of Cardiology and Respiratory, Quebec; University of Alberta Adult ICU, Edmonton; University of Manitoba, Manitoba; Vancouver General Hospital, Vancouver; Vancouver Island Health, Vancouver; William Osler Health Sciences System - Etobicoke General Hospital, Toronto.

### **Chile**

Clinica Alemana DeSantiago, Santiago; Clinica Las Condes, Santiago; Instituto Nacional Del Tórax, Santiago; Hospital Clínico La Florida, Dra Eloísa Díaz Insunza, Santiago; Hospital Padre Hurtado, Santiago; Hospital Carlos Van Buren, Valparaiso; Hospital Sotero del Rio, Santiago; Hospital Dr. Exequiel González Cortés, Santiago.

### **China**

Pamela Youde Nethersole Eastern Hospital, Chai Wan; Princess Margaret Hospital, Kwai Hung; Queen Elizabeth Hospital, Yau Ma Tei; Queen Mary Hospital, Pok Fu Lam.

### **Colombia**

Clinica Universidad de La Sabana, Chia; Clinica Valle de Lilli, Valle del Cauca; Fundación Cardiovascular de Colombia, Floridablanca; Universidad del Cauca, Cauca; Hospital Pablo Tobón Uribe, Medellín; Clínica Infantil Colsubsidio, Bogota; Fundación Valle del Lili, Cali; Instituto Roosevelt, Bogota; Fundación Cardioinfantil-Instituto de Cardiología, Bogota; UMHES Santa Clara de la Subred Centro Oriente, Bogota; IMAT Oncomedica, Montería; Hospital Infantil Los Ángeles, Pasto; Clínica UROS, Neiva; Clínica Infantil Santa María del Lago, Bogota; Hospital Universitario San Ignacio, Bogota; Hospital Universitario San Jorge, Pereira.

### **Czechia**

University Hospital Ostrava, Ostrava-Poruba.

### **Dominican Republic**

The Center for Diagnosis, Santo Domingo.

## **Ecuador**

Catholic University, Quito; Hospital de Especialidades Eugenio Espejo, Quito; Hospital General San Francisco, Quito; Universidad de Las Américas, Quito.

## **Estonia**

North Estonia Medical Centre, Tallin; Tartu University Hospital, Tartu.

## **France**

Centre Hospitalier Agen-Nérac, Agen; Centre Hospitalier Alpes-Leman, Contamine-sur-Arve; Centre Hospitalier Annecy Genevois, Annecy; Centre Hospitalier Antoine Béclère, Clamart; Centre Hospitalier Bretagne Atlantique, Vannes; Centre Hospitalier de Béziers, Béziers; Centre Hospitalier de Bourg-en-Bresse, Bourg-en-Bresse; Centre Hospitalier de Cahors, Cahors; Centre Hospitalier de Cholet, Cholet; Centre Hospitalier de Colmar, Colmar; Centre Hospitalier de Dax - Côte d'Argent, Dax; Centre Hospitalier de Digne-les-Bains, Digne-les-Bains; Centre Hospitalier de Melun, Melun; Centre Hospitalier de Pau, Pau; Centre Hospitalier de Périgueux, Périgueux; Centre Hospitalier de Perpignan, Perpignan; Centre Hospitalier de Saint-Denis, Saint-Denis; Centre Hospitalier de Saintonge, Saintes; Centre Hospitalier de Soissons, Soissons; Centre Hospitalier de Toulon, Toulon; Centre Hospitalier de Tourcoing, Tourcoing; Centre Hospitalier Départemental Vendée, La Roche-sur-Yon; Centre Hospitalier du Pays d'Aix, Aix-en-Provence; Centre Hospitalier Emile Roux, Le Puy-en-Velay; Centre Hospitalier Henri Duffaut, Avignon; Centre Hospitalier intercommunal de Créteil, Créteil; Centre Hospitalier Intercommunal Villeneuve-Saint-Georges, Villeneuve-Saint-Georges; Centre Hospitalier Le Mans, Le Mans; Centre Hospitalier Louis Raffalli, Manosque; Centre Hospitalier Métropole Savoie, Chambéry; Centre Hospitalier Mont-de-Marsan, Mont-de-Marsan; Centre Hospitalier Pierre Oudot, Bourgoin-Jallieu; Centre Hospitalier Régional et Universitaire de Nancy - Hôpitaux de Brabois, Nancy; Centre Hospitalier Régional et Universitaire de Tours, Tours; Centre Hospitalier Régional Metz-Thionville, Metz; Centre Hospitalier Techer, Calais; Centre Hospitalier Universitaire Ambroise-Paré, Boulogne-Billancourt; Centre Hospitalier Universitaire Amiens-Picardie, Amiens; Centre Hospitalier Universitaire d'Angers, Angers; Centre Hospitalier Universitaire de Besançon, Besançon; Centre Hospitalier Universitaire de Brest, Brest; Centre Hospitalier Universitaire de Lille, Lille; Centre Hospitalier Universitaire de Lyon - HCL, Lyon; Centre Hospitalier Universitaire de Montpellier, Montpellier; Centre Hospitalier Universitaire de Nantes (Hôpital femme-enfant-adolescent), Nantes; Centre Hospitalier Universitaire de Nantes (Hôpital Nord Laennec), Saint-Herblain; Centre Hospitalier Universitaire de Nantes (Hôtel-Dieu), Nantes; Centre Hospitalier Universitaire de Nice (Hôpital Archet), Nice; Centre Hospitalier Universitaire de Nice (Hôpital Pasteur), Nice; Centre Hospitalier Universitaire de Nîmes, Nîmes; Centre Hospitalier Universitaire de Poitiers, Poitiers; Centre Hospitalier Universitaire de Reims, Reims; Centre Hospitalier Universitaire de Saint-Étienne, Saint-Étienne; Centre Hospitalier Universitaire de Strasbourg, Strasbourg; Centre Hospitalier Universitaire Gabriel Montpied, Clermont-Ferrand; Centre Hospitalier Universitaire Grenoble-Alpes, Grenoble; Centre Hospitalier Universitaire Grenoble-Alpes\_FU, Grenoble; Centre Hospitalier Universitaire Mitterrand Dijon-Bourgogne, Dijon; Centre Hospitalier Universitaire Rennes (Hôpital Pontchaillou), Rennes; Centre Hospitalier Universitaire Rennes (Hôpital Sud), Rennes; Centre Hospitalier Universitaire Rouen (Centre Hospitalier Universitaire de Rouen), Rouen; Centre Hospitalier Universitaire Rouen (Hôpital Charles Nicolle), Rouen; Centre Hospitalier Universitaire Toulouse (IUCT), Toulouse; Centre Hospitalier Universitaire Toulouse (Larrey), Toulouse; Centre Hospitalier Universitaire Toulouse (Rangueil), Toulouse; CHU Carémeau, Nîmes; Clinique de l'Infirmier Protestant de Lyon, Lyon; Grand Hôpital de l'Est Francilien (Site de Marne-la-Vallée), Jossigny; Grand Hôpital de l'Est Francilien (Site de Meaux), Meaux; Groupe Hospitalier Diaconesses Croix Saint-Simon, Paris; Hôpital Albert Calmette, Lille; Hôpital Américain de Paris, Neuilly-sur-Seine; Hôpital Arnaud de Villeneuve, Montpellier; Hôpital Avicenne, Bobigny; Hôpital Bel-Air, Thionville; Hôpital Bichat Claude-Bernard AP-HP, Paris; Hôpital Cochin AP-HP, Paris; Hôpital d'Instruction des Armées Bégin, Saint-Mandé; Hôpital de la Conception, Marseille; Hôpital de la Croix-Rousse - HCL, Lyon; Hôpital de la Pitié Salpêtrière AP-HP, Paris; Hôpital de la Timone, Marseille; Hôpital Européen Georges-Pompidou AP-HP, Paris; Hôpital Européen Marseille, Marseille; Hôpital Femme Mère Enfant - HCL, Lyon; Hôpital Foch, Suresnes; Hôpital Henri-Mondor, Créteil; Hôpital Jacques Monod, Le Havre; Hôpital Kremlin-Bicêtre, Le Kremlin-Bicêtre; Hôpital Laënnec - site de Quimper, Quimper; Hôpital Lariboisière AP-HP, Paris; Hôpital Louis-Mourier, Colombes; Hôpital Lyon Sud - HCL, Lyon; Hôpital Necker-Enfants Malades AP-HP, Paris; Hôpital Nord, Marseille; Hôpital Pellegrin, Bordeaux; Hôpital privé

d'Antony, Antony; Hôpital Purpan, Toulouse; Hôpital Raymond-Poincaré, Garches; Hôpital Robert-Debré AP-HP, Paris; Hôpital Saint-Antoine AP-HP, Paris; Hôpital Saint-Joseph, Paris; Hôpital Saint-Louis AP-HP, Paris; Hôpital Tenon AP-HP, Paris; INSERM, Paris; Thonon-les-Bains, Thonon-les-Bains.

### **French Guiana**

Centre Hospitalier Andrée Rosemon, Cayenne.

### **Germany**

Jena University Hospital, Jena; Klinik und Poliklinik für Innere Medizin II, University Hospital Regensburg, Kiel; Klinikum Passau, Germany; Krankenhaus Barmherzige Br, Regensburg; LMU Hospital Munich, Medical Department II, Campus Großhadern, Munich; Uniklinik University Hospital, Frankfurt; University Children's Hospital, University Medical Center Hamburg-Eppendorf, Hamburg; University Hospital Dusseldorf, Dusseldorf; University Hospital of Tubingen, Tubingen.

### **Ghana**

Kintampo Health Research Centre, Kintampo.

### **Gibraltar**

St Bernard's Hospital, Gibraltar.

### **Greece**

Hippokration Hospital, Thessaloniki; Sotiria General Hospital, Athens.

### **Guadeloupe**

Centre Hospitalier Universitaire de Guadeloupe, Pointe-à-Pitre; Saint-Martin, Saint-Martin.

### **Honduras**

Hospital Regional del Norte IHSS, San Pedro Sula.

### **India**

ABC Hospital, Visakhapatnam; All India Institute of Medical Sciences, Rishikesh; Apollo First Med Hospital, Chennai; Apollo Hospitals Chennai, Chennai; Apollo Main Hospital, Chennai; Apollo Speciality Hospital - OMR, Chennai; Apollo Speciality Vanagaram, Chennai; Ispat General Hospital, Rourkela; Kerala Institute of Medical Sciences, Trivandrum; Manipal Hospital Whitefield, Bangalore; Mehta Hospital, Chennai; Pushpagiri Medical College Hospital, Kerala.

### **Indonesia**

Adult ICU Saiful Anwar Hospital, Malang; Dr Sardjito Government Hospital (Paediatric), Yogyakarta; Fatmawati Hospital, Jakarta; Hasan Sadikin Hospital, Bandung; Murni Teguh Memorial Hospital and Bunda Thamrin Hospital, North Sumatera; National Cardiovascular Center Harapan Kita Jakarta Indonesia, Jakarta; Persahabatan Hospital, Jakarta; PICU Saiful Anwar Hospital, Malang; Pratama Rada Bolo Hospital, Karitas Hospital and Waikabubak Hospital, Sumba; Prof Dr R. D. Kandou Central Hospital (Adult), Manado; Prof Dr R. D. Kandou Central Hospital (Paediatric), Manado; RSPI Prof Dr Sulianti Saroso, Jakarta; RSUD Dr. Soetomo, Surabaya; RSUD Pasar Minggu, South Jakarta; RSUP Fatmawati, South Jakarta; Sanglah General Hospital (Paediatric), Bali; University Airlangga Hospital (Paediatric), Surabaya.

### **Ireland**

Beacon Hospital, Dublin; Beaumont Hospital, Dublin; Bon Secours Hospital, Cork; Children's Health Ireland, Dublin; Connolly Hospital Blanchardstown, Dublin; Cork University Hospital, Cork; Galway University Hospital, Galway; Mater Misericordiae University, Dublin; Mercy Hospital, Cork; Our lady of Lourdes Drogheda, Drogheda; Sligo University Hospital (Saolta), Sligo; St James's Hospital, Dublin; St Vincents University Hospital, Dublin; Tallaght University Hospital, Dublin; University Hospital, Kerry; University Hospital - Limerick, Limerick; University Hospital - Waterford, Waterford; Wexford General Hospital, Wexford.

## **Israel**

Bar-Ilan University, Ramat Gan; Rambam Hospital, Haifa; The Baruch Padeh Medical Center Poriya, Tiberias.

## **Italy**

Azienda Ospedaliero Universitario Pisana, Pisa; Azienda Provinciale per i Servizi Sanitari della Provincia Autonoma di Trento, Arco; Borgo San Lorenzo Hospital, Trento; Fondazione IRCCS Ca, Milan; Fondazione Policlinico Universitario Agostino Gemelli IRCCS, Rome; Istituto Mediterraneo per i Trapianti e Terapie ad Alta Specializzazione, Palermo; Monaldi Hospital, Napoli; Ospedale Molinette, Torino; Ospedale Niguarda, Milan; Ospedale Papa Giovanni XXIII - Bergamo, Bergamo; Ospedale Sacro Cuore Don Calabria, Negrar Di Valpolicella; Ospedale San Gerardo, Monza; Ospedale San Paolo, Milan; Policlinico of Padova, Padova; Policlinico di Orsola Università di Bologna, Bologna; San Martino Hospital, Genoa; Università Cattolica del Sacro Cuore, Rome; University Hospital of Parma, Parma; University Hospital Policlinico Paolo Giaccone, Palermo; University of Brescia, Brescia; University of Padua, Padua.

## **Japan**

Chiba University Hospital, Chiba; Fujieda Municipal General Hospital, Fujieda; Fukuoka University, Fukuoka; Hiroshima University, Hiroshima; Hokkaido University Hospital, Hokkaido; Hyogo Prefectural Kakogawa Medical Center, Hyogo; Kimitsu Chuo Hospital, Chiba; Kouritu Tousei Hospital, Seto City; Kyoto Medical Centre, Kyoto; Kyoto Prefectural University of Medicine, Kyoto; Mie University Hospital, Tsu; Nagoya University Hospital, Nagoya; Obihiro-Kosei General Hospital, Obihiro; Rinku General Medical Center, Osaka; Saiseikai Senri Hospital, Tochigi; Saiseikai Utsunomiya Hospital, Tochigi; Shizuoka Children's Hospital, Shizuoka; St. Marianna University School of Medicine, Kawasaki; Teine Keijinkai Hospital, Sapporo; Tohoku Medical and Pharmaceutical University, Sendai; Tohoku University, Sendai; Tokyo Metropolitan Tama Medical Center, Tokyo; Yokohama City University Medical Center, Yokohama.

## **Kenya**

Mount Kenya University, Thika.

## **Kuwait**

Al-Adan Hospital, Hadiya; Al-Amiri & Jaber Al-Ahmed Hospitals, Kuwait City.

## **Laos**

Lao-Oxford-Mahosot Hospital-Wellcome Trust Research Unit, Vientiane; Luang Namtha Provincial Hospital, Luang Namtha; Salavan Provincial Hospital, Salavan; Xieng Khouang Provincial Hospital, Phonsavan.

## **Malawi**

Malawi-Liverpool Wellcome Trust, Lilongwe.

## **Malaysia**

Hospital Universiti Sains Malaysia, Kota Bharu; International Islamic University Malaysia Medical Centre (IIUMMC), Pahang; Kluang Hospital, Johor; Kuala Lumpur Hospital, WPKL; Lahad Datu Hospital, Sabah; Melaka Hospital, Melaka; National Institutes of Health (NIH), Ministry of Health Malaysia, Setia Alam; Permai Hospital, Johor; Pulau Pinang Hospital, Pulau Pinang; Raja Perempuan Zainab II Hospital, Kelantan; Raja Permaisuri Bainun Hospital, Perak; Sarawak General Hospital, Sarawak; Sultanah Aminah Hospital, Johor; Sultanah Bahiyah Hospital, Kedah; Sultanah Nur Zahirah Hospital, Terengganu; Sungai Buloh Hospital, Selangor; Sunway Medical Centre, Selangor; Tawau Hospital, Sabah; Tengku Ampuan Afzan Hospital, Pahang; Tuanku Fauziah Hospital, Perlis; Tuanku Ja'afar, Negeri Sembilan; University Malaya Medical Centre, Kuala Lumpur.

## **Mayotte**

Centre Hospitalier de Mayotte, Mamoudzou.

## **Mexico**

Hospitales Puerta de Hierro, Jalisco; University of Guadalajara Health Sciences Center, Guadalajara; UMAE Hospital de Pediatría CMN Siglo XXI “Dr. Silvestre Frenk Freund”, IMSS Mexico City.

### **Nepal**

B & B Hospital, Lalitpur; Chitwan Medical College, Chitwan; Grande International Hospital, Kathmandu; Hospital for Advanced Medicine and Surgery (HAMS) 1, Kathmandu; Karuna Hospital, Kathmandu; Nepal Mediciti Hospital, Lalitpur; Nidan Hospital, Lalitpur; Om Hospital, Kathmandu; Tribhuvan University Teaching Hospital, Kathmandu.

### **Netherlands**

ADRZ, Amsterdam; Alrijne Hospital, Leiden; Beatrix ziekenhuis, Gorinchem; Canisius Wilhelmina Ziekenhuis, Nijmegen; Catharina Ziekenhuis, Eindhoven; Erasmus Medical Centre, Rotterdam; Flevoziekenhuis, Almere; Franciscus Gasthuis & Vlietland, Rotterdam; Gelre Hospitals, Zutphen; Leiden University Medical Center, Leiden; Maastricht University Medical Centre, Maastricht; Meander Medical Centre, Amersfoort; Medisch Spectrum Twente, Zutphen; Noordwest-Ziekenhuisgroep, DenHelder; Reinier de Graaf Gasthuis, Delft; Tergooi Hospital, Hilversum; University Medical Center Groningen, Groningen; Ziekenhuisgroep Twente, Hengelo.

### **New Zealand**

Auckland City Hospital (CVICU), Auckland; Auckland City Hospital (DCCM 82), Auckland; Dunedin Public Hospital, Dunedin; Middlemore Hospital (Canties Manukan Health), Otahuhu; Nelson Hospital, Nelson; Waikato Hospital, Hamilton; Waitemata District Health Board, Auckland; Wellington Regional Hospital, Wellington.

### **Norway**

Akershus University Hospital, Nordbyhagen; Alanda Health, Oslo; Baerum Sykehus, Gjøttum; Drammen Hospital, Drammen; Oslo University Hospital, Oslo; The Norwegian Corona Cohort, Oslo; University Hospital of North Norway, Tromsø.

### **Pakistan**

Abbasi Shaheed Hospital, Karachi; Azeema Sheikh Hospital, Islamabad; Bahria International Hospital, Islamabad; Critical Care Asia Site A-AF-012-002, Karachi; Critical Care Asia Site A-AF-012-003, Karachi; Critical Care Asia Site A-AF-015-002, Karachi; Darul Sehat Hospital, Karachi; Doctors Hospital, Lahore; GMMM Teaching Hospital, Sukkar; Hameed Latif Hospital, Lahore; Jinnah Hospital, Lahore; Jinnah Post-Graduate Medical Center (SICU), Karachi; Lady Reading hospital, Peshawar; Lahore General Hospital, Lahore; Lahore General Hospital (Phase 3 SICU), Lahore; Liaquat University Hospital (SICU), Hyderabad; Mayo Hospital Lahore (BICU), Lahore; National Hospital & Medical Center, Lahore; NICVD, Karachi; North West General Hospital, Peshawar; Pakistan Kidney & Liver Institute, Lahore; Patel Hospital, Karachi; PIMS, Islamabad; Sheikh Zayed Medical College Rahim yar Khan, Rahim yar Khan; SIUT Hospital, Karachi; South City Hospital Karachi, Karachi; Ziauddin Medical University Clifton Campus, Karachi.

### **Peru**

Clínica Internacional, Lima; Hospital Emergencia Ate Vitarte, Lima; Hospital de Emergencias Villa El Salvador, Lima; Hospital Nacional Edgardo Rebagliati Martins, Lima.

### **The Philippines**

Angeles University Foundation Medical Center, Angeles; Makati Medical Centre, Makati.

### **Poland**

Consortium IMGEN, Piaseczno; Department of Children’s Infectious Diseases, Warsaw; Institute of TB and Lung Diseases, Warsaw; University Hospital in Krakow, Krakow.

### **Portugal**

Centro Hospital e Universitário de Coimbra, Coimbra; Centro Hospitalar de Leiria, Leiria; Centro Hospitalar de Tondela-Viseu, Viseu; Centro Hospitalar e Universitário de Coimbra - Hospital Pediátrico, Coimbra;



Centro Hospitalar Universitário do Algarve, Portimão; Centro Hospitalar Universitário do Porto (CHUP), Porto; Centro Hospitalar Vila Nova de Gaia/Espinho, Espinho; Comissão de Ética - Unidade Local de Saúde de Matosinhos, Porto; Hospital Beatriz Ângelo, Loures; Hospital Curry Cabral - Intensive Care Unit - UCIP7, Lisbon; Hospital Da Luz, Lisbon; Hospital de Abrantes - ICU, Abrantes; Hospital de Curry Cabral - Infectious Diseases, Lisbon; Hospital de Curry Cabral - Internal Medicine, Lisbon; Hospital de São José -U.U.M., Lisbon; Hospital Egas Moniz, Lisboa; Hospital Espírito Santo de Évora, Évora; Hospital Garcia de Orta, Almada; Hospital Professor Doutor Fernando Fonseca, Amadora; Hospital Santa Maria, Centro Hospitalar Universitário Lisboa Norte, Amadora; Hospital São Francisco Xavier, Lisbon; Hospital Vila Franca de Xira, Lisbon; São João Hospital Centre, Porto; Unidade Local de Saúde de Alto Minho, Viana Do Castelo.

### **Qatar**

Hamad General Hospital, Doha.

### **Réunion**

Centre Hospitalier Félix-Guyon, Saint-Denis; Centre Hospitalier Universitaire de Saint-Pierre, Saint-Pierre.

### **Romania**

Grigore T Popa University of Medicine and Pharmacy, Bucharest; National Institute for Infectious Diseases Matei Bals, Bucharest.

### **Russia**

Sechenov University, Moscow.

### **Saint Martin (French)**

Centre Hospitalier Universitaire de Martinique, Fort-de-France.

### **Saudi Arabia**

King Abdulaziz Medical City, Riyadh; King Faisal Hospital Research Center, Riyadh.

### **Singapore**

National University Hospital, Singapore.

### **South Africa**

2 Military Hospital; 3 Military Hospital; AbaQulusi Private Hospital; Aberdeen Hospital; Abraham Esau Hospital; Addington Hospital; Adelaide Hospital; Ahmed Al-Kadi Private Hospital; Alan Blyth Hospital; Albert Nzula District Hospital; Alexandra Hospital; Aliwal North Hospital; All Saints Hospital; Amajuba Memorial Hospital; Andries Vosloo Hospital; Arwyp Medical Centre; Aurora Hospital; Aurora Rehabilitation Hospital; Bambisana Hospital; Barberton Hospital; Bayview Private Hospital (Life); Beaufort West Hospital; Bedford Hospital; Beethoven Recovery Centre; Belfast Hospital (HA Grove); Benedictine Hospital; Bertha Gxowa Hospital; Bethal Hospital; Bethesda Hospital; Bheki Mlangeni Hospital; Bill Pickard Hospital; Bisho Hospital; Bloemcare Psychiatric Hospital; Boitumelo Hospital; Bongani Nurses' Dormitory Surge Facility; Bongani Regional Hospital; Botlokwa Hospital; Botshabelo Hospital; Botshelong Empilweni Hospital; Botshilu Private Hospital; Brackengate Intermediate Care; Brewelskloof Hospital; Brits Hospital; Bronkhorstspuit Hospital; Brooklyn Chest Hospital; Bryanston Subacute; Burgersdorp Hospital; Busamed - Paardevlei private hospital; Busamed Bram Fischer International Airport Hospital; Busamed Gateway Private Hospital; Busamed Harrismith Private Hospital; Busamed Hillcrest Private Hospital; Busamed Modderfontein Private Hospital Orthopaedic and Oncology Centre; Butterworth Hospital; Cairnhall Hospital; Cala Hospital; Caledon Hospital; Canzibe Hospital; Cape Gate Mediclinic; Capital hospital; Care Cure Queenstown; Carewell Sub-Acute Hospital; Carletonville Hospital; Carolina Hospital; Cathcart Hospital; Catherine Booth Hospital; Cecilia Makiwane Hospital; Ceres Hospital; Ceza Hospital; Charles Johnson Memorial District Hospital; Charlotte Maxeke Hospital; Chris Hani Baragwanath Hosp; Christ The King Hospital; Citrusdal Hospital; Clairwood Hospital; Clanwilliam Hospital; Clinix Naledi Nkanyezi Hospital; Clinix Solomon Stix Morewa Hospital; Cloete Joubert Hospital; Cn Phatudi Hospital; Cofimvaba Hospital;

Corona Sub-Acute Hospital; Cradock Hospital; Crescent Clinic; CTICC COVID Intermediate Care; Cullinan Rehabilitation Hospital; Daxina Hospital; Daymed Private Hospital; De Aar Hospital; Diamant Hospital; Dihlabeng Hospital; Dilokong Hospital; Donald Fraser Hospital; Donald Gordon Medical Centre; Dora Nginza Hospital; Dordrecht Hospital; Doris Goodwin Hospital; Douglas CHC; DP Marais Santa Centre; Dr George Mukhari Hospital; Dr Harry Surtie Hospital; Dr JS Moroka Hospital; Dr Malizo Mpehle Hospital; Dr S K Matseke Memorial Hospital; Dr Yusuf Dadoo Hospital; Duff Scott Memorial Hospital; Dundee Hospital; Durdoc Hospital; East Griqualand & Usher Memorial Hospital; Eden Gardens Private Hospital; Edendale Hospital; Edenvale Hospital; Eerste River Hospital; Ekombe Hospital; Elim Hospital; Elizabeth Donkin Hospital; Elizabeth Ross Hospital; Elliot Hospital; Ellisras Hospital; Elsie Ballot Hospital; Emalahleni Private Hospital; Embhuleni Hospital; Emmaus Hospital; EmoyaMed Private Hospital; Empilisweni Hospital; Empilweni Hospital; Ermelo Provincial Hospital; Eshowe Hospital; Eskom Academy of Learning Quarantine Site; Esselenpark School of Excellence Quarantine Site; Estcourt Hospital; Evander Hospital; Evuxakeni Hospital; False Bay Hospital; Far East Rand Hospital; Fezi Ngubentombi Provincial Hospital; FH Odendaal Hospital; Fisha wellness Hospital; Fort Beaufort Hospital; Fort England Hospital; Fort Napier Hospital; Frere Hospital; Fritz Visser Hospital; Frontier Hospital; Ganyesa Community Hospital; General Justice Gizenga Mpanza Hospital; George Hospital; George Masebe Hospital; GJ Crooke's Hospital; Glen Grey Hospital- Lady Frere; Greenville Hospital; Grey Hospital; Grey's Hospital; Greytown Hospital; Greytown Specialized TB Hospital; Groblersdal Hospital; Groote Schuur Hospital, Cape Town; Hanover Park Clinic Wc Par; Harry Comay Hospital Wc Hch; Hayani Psychiatric Hospital; Heidelberg Hospital; Heideveld Cdc Wc Hvp; Heideveld Emergency Centre; Helderberg Hospital; Helderberg Village, Somerset West; Helen Joseph Hospital; Helene Franz Hospital; Hermanus Hospital; Hewu Hospital; Hibiscus Cato Ridge Private Hospital; Hibiscus private hospital; Highway Sub-Acute; Hillandale Health Care Centre; Hillcrest Hospital; Hlabisa Hospital; Holy Cross Hospital; Hopetown Hospital; House Idahlia Critical Care Surge Facility; Humansdorp Hospital; Indwe Hospital; Inkosi Albert Luthuli Hospital; Isilimela Hospital; Isivivana Private Hospital; Itemoheng Hospital; Itshelejuba Hospital; Jamestown Hospital; Jane Furse Hospital; JMH Ascot Park Hospital; JMH City Hospital; JMH Isipingo Hospital; Job Shimankana Tabane Hospital; Joe Morolong Memorial Hospital; John Daniel Newsberry Hospital; Jose Pearson TB Hospital; Jubilee Hospital; Kakamas Hospital; Kalafong Hospital; Kareedouw Hospital; Karl Bremer Hospital; Kathu private hospital; Katleho Hospital; Keimoes Hospital; Kgapane Hospital; Khayelitsha Dist Hospital; Khotsong TB Hospital; Kiaat Private hospital; KimMed Private Hospital; King Dinuzulu Hospital; King Edward VIII Hospital; Klerksdorp Hospital; Knysna Hospital; Knysna Private Hospital Wc KvH; Kokstad Private Hospital; Komani Hospital; Komga Hospital; Kopanong Hospital; Kuruman Hospital; Kwa-Magwaza Hospital; KwaDukuza Private Hospital; Kwamhlanga Hospital; La Verna Private Hospital; Lady Grey Hospital; Ladysmith Hospital; Laingsburg Hospital; Lapa Munnik Hospital; Lebowakgomo Hospital; Lenmed Ahmed Kathrada Hospital; Lenmed Bokamoso Private Hospital; Lenmed Ethekwini Hospital and Heart Centre; Lenmed Randfontein Private Hospital; Lenmed Royal Hospital and Heart Centre; Lenmed Zamokuhle Private Hospital; Lentegeur Hospital; Leratong Hospital; Letaba Hospital; Life Anncron Hospital; Life Beacon Bay Private Hospital; Life Bedford Gardens Hospital; Life Brackenview; Life Brenthurst Hospital; Life Carstenhof Hospital; Life Carstenview Hospital; Life Chatsmed Garden Hospital; Life Cosmos Hospital; Life Dalview Hospital; Life East London Private Hospital; Life Empangeni Private Hospital; Life Entabeni Hospital; Life Eugene Marais Hospital; Life Flora Hospital; Life Fourways Hospital; Life Genesis Clinic Saxonwold; Life Glynnview Hospital; Life Groenkloof Hospital; Life Health Care (Faerie Glen); Life Hilton Private Hospital; Life Hunters Craig Hospital; Life Kingsbury Hospital; Life Midmed Hospital; Life Mt Edgecombe Hospital; Life Pasteur Hospital; Life Peglerae Hospital(pty)ltd; Life Poortview Hospital; Life Queenstown Private Hospital; Life Riverfield Rehab Centre; Life Robinson Pvt Hospital; Life Roseacres Hospital; Life Rosepark Hospital; Life Springs Parkland Hospital; Life St Dominic's Hospital; Life St George's Hospital; Life Suikerbosrand Hospital; Life the Crompton hospital; Life The Glynnwood Hospital; Life Vincent Pallotti Hospital; Life Westcoast Private Hospital; Life westville hospital; Life Wilgeheuwel Hospital; Life Wilgers Hospital; Livingstone Hospital; Louis Pasteur Private Hospital; Louis Trichardt Hospital; Lydenburg Hospital; Lynnmed Clinic; Maclear Hospital; Madadeni Hospital; Madwaleni Hospital; Madzikane Ka Zulu Memorial Hospital; Mafube Hospital; Mahatma Gandhi Memorial Hospital; Mahikeng Provincial Hospital; Malamulele Hospital; Malmesbury Infectious Disease Hosp Wc Mid; Mamelodi Hospital; Manapo Hospital; MANCOVS Surge Facility; Manguzi Hospital; Mani Dipico Hospital; Mankweng Hospital; Maphuta L Malatji Hospital; Mapulaneng Hospital; Martjie Venter Hospital; Maseve Filed - Royal Bafokeng (priv); Matatiele Private Hospital; Matibidi Hospital; Matikwana Hospital; Matlala

Hospital; Mbongolwane Hospital; Mccords Hospital; Mecklenburg Hospital; Medforum Private Hospital; Medicare private hospital; Mediclinic Bloemfontein; Mediclinic Brits; Mediclinic Cape Town; Mediclinic Constantiaberg; Mediclinic Durbanville; Mediclinic emfuleni; Mediclinic Ermelo; Mediclinic Gariiep; Mediclinic Geneva; Mediclinic George Hospital; Mediclinic Gynaecological Hospital; Mediclinic Heart Hospital; Mediclinic Hermanus; Mediclinic Highveld; Mediclinic Hoogland; Mediclinic Howick; Mediclinic Kimberley; Mediclinic Klein Karoo; Mediclinic kloof; Mediclinic Legae; Mediclinic Lephalale; Mediclinic Limpopo; Mediclinic Louis Leipoldt; Mediclinic Midstream; Mediclinic Milnerton; Mediclinic Morningside; Mediclinic Muelmed; Mediclinic Paarl; Mediclinic Panorama; Mediclinic Pietermaritzburg; Mediclinic Plettenberg Bay; Mediclinic potchefstroom; Mediclinic Sandton; Mediclinic Stellenbosch; Mediclinic Thabazimbi; Mediclinic Tzaneen; Mediclinic Upington; Mediclinic Vereeniging; Mediclinic Vergelegen; Mediclinic Victoria; Mediclinic Welkom; Mediclinic Winelands Orthopaedic Hospital; Mediclinic Worcester; Medicross Cape Town Foreshore Theatre; Medicross langeberg; Medicross Procure; Medicross Richards Bay Day Theatre; Medicross Upington Day Theatre; Medicross Wembley House; Medleb; Melomed bellville; Melomed Gatesville; Melomed Mitchell's Plain; Melomed Richardsbay HOSPITAL; Melomed Tokai Private Clinic; Mercantile Private Hospital; Messina Hospital; Middelburg Hospital; Midland Hospital; Midlands Medical Centre Private Hospital; Midvaal Private Hospital; Mitchell's Plain Covid Field Intermediate Care; Mitchell's Plain District Hosp; Mjanyana Hospital; Mmametlhake Hospital; Modimolle MDR TB Hospital; Mohau Hospital; Mokopane Hospital; Molteno Hospital; Montagu Hospital; Montebello Hospital; Mooimed Private Hospital; Morehill Clinic Physical rehab; Mossel Bay Hospital; Mosvold Hospital; Mount Ayliff Hospital; Mowbray Maternity Hospital; Mseleni Hospital; Mthatha Private Hospital; Murchison Hospital; Murraysburg Hospital; N17 Hospital; Nala Hospital; Nasrec Quarantine Site; National District Hospital; National Institute for Communicable Diseases, Johannesburg; National Institute for Communicable Diseases, South Africa, Johannesburg; Nelson Mandela Academic Hospital; Nelspruit Medi Clinic; Nessie Knight Hospital; Netcare Akasia Hospital; Netcare Alberlito Hospital; Netcare Blaauwberg Hospital; Netcare Bougainville Hospital; Netcare Ceres Hospital; Netcare Christiaan Barnard Memorial Hospital; Netcare Clinton; Netcare Cuyler Hospital; Netcare Femina Hospital; Netcare ferncrest hospital; Netcare Garden City Hospital; Netcare Greenacres Hospital; Netcare Jakaranda Hospital; Netcare Kingsway Hospital; Netcare Kroon Hospital; Netcare Krugersdorp Hospital; Netcare Kuils River Hospital; Netcare Lakeview Hospital; Netcare Linksfield Hospital; Netcare Linkwood Hospital; Netcare Linmed Hospital; Netcare Margate Hospital; Netcare Milpark Hospital; Netcare Montana Hospital; Netcare Moot Hospital; Netcare Mulbarton Hospital; Netcare N1 City Hospital; Netcare Olivedale Hospital; Netcare Optiklin Hospital; Netcare Parklands Hospital; Netcare Pelonomi Private Hospital; Netcare Pholoso Hospital; Netcare Pinehaven Hospital; Netcare Pretoria-East Hospital; Netcare Rehabilitation Hospital; Netcare Rosebank Hospital; Netcare St Anne's Hospital; Netcare St Augustine Hospital; Netcare Sunninghill Hospital; Netcare Sunward Park Hospital; Netcare The Bay Hospital; Netcare Umhlanga Hospital; Netcare Union Hospital; Netcare Unitas ECMO Centre; Netcare Unitas Hospital; Netcare Vaalpark Clinic; Netcare Waterfall Hospital; New Kensington Clinic (Life); New Somerset Hospital; Newcastle Hospital; Newcastle Private Hospital; Ngwelezana Hospital; Nkandla Hospital; Nketoana District Hospital; Nkhensani Hospital; Nkonjeni Hospital; Nkqubela Chest Hospital; Nompumelelo Hospital; Nurture Cape View; Nurture Ilembe; Nurture Newlands; Nurture Queenstown; Nurture Rynmed; Nurture Sunnyside; Nurture Vereeniging; Nurture Woodlands (Mental Health Institution); ODI Community Hospital; Orsmond TB Hospital; Osindisweni Hospital; Othobothini CHC; Otto Du Plessis Hospital; Oudtshoorn Hospital; Paarl Hospital; Park Lane Clinic; Parys Hospital; Pelonomie Hospital; Phekolong Hospital; Philadelphia Hospital; Pholosong Hospital; Phumelela Hospital; Phuthuloha Hospital; Piet Retief Hospital; Polokwane Hospital; Port Alfred Hospital; Port Shepstone Hospital; Postmasburg Hospital; Potchefstroom Hospital; Pretoria Eye Institute Arcadia; Pretoria Urology Hospital; Pretoria West Hospital; Prieska Hospital; Prince Albert Hospital; Prince Cyril Zulu Cdc; Prince Mshiyeni Hospital; Prof ZK Matthews Hospital; Queen Nandi Regional Hospital; Radie Kotze Hospital; Rahima Moosa Mother And Child Hospital; Red Cross Childrens Hospital; Rev Dr Elizabeth Mamisa Chabula-Nxiweni Field Hospital; RH Matjhabeng Hospital; RH Phodiclinic; RH Piet Retief Hospital; RH Rand Hospital; Richmond Hospital; Riemland Clinic; Rietvlei Hospital; Riversdale Hospital; RK Khan Hospital; Rob Ferreira Hospital; Robert Mangaliso Sobukwe Hospital; Robertson Hospital; Rondebosch medical centre; Sabie Hospital; Sawas Hospital; Schweizer Reneke Hospital; Sebokeng Hospital; Sekororo Hospital; Seniorita Ntlabathi District Hospital; Seshego Hospital; Settlers Hospital PPP; Shelly Beach Private Hospital; Shifa private hospital; Shongwe Hospital; Siloam Hospital; Sipetu Hospital; Sizwe Tropical Diseases Hosp; Sonstraal Hospital; South Rand Hospital; Springbok Hospital; SS Gida Hospital;

St Aidan's Mission Hospital; St Andrews Hospital; St Apollinaris Hospital; St Barnabas Hospital (Ntlaza); St Elizabeth Hospital; St Francis Hospital (aliwal North); St Helena GM Hospital; St Lucy's Hospital; St Margarets Hospital; St Mary's Hospital; St Mary's Hospital - Umtata; St Patrick's Hospital; St Rita's Hospital; Standerton Hospital; Standerton Tb Hospital; Stellenbosch Hospital; Sterkfontein Hospital; Sterkstroom Hospital; Steve Biko Academic Hospital; Steynsburg Hospital; Stikland Psychiatric Hospital; Stoffel Coetzee Hospital; Stutterheim Hospital; Sundays Valley Hospital; Sunningdale Hospital; Sunshine Hospital; Swartland Hospital; Swellendam Hospital; Tafalofefe Hospital; Tambo Memorial Hospital; Tara H Moross Hospital; Taung Hospital; Tayler Bequest Hospital (matatiele); Taylor Bequest Hospital (mount Fletcher); Tb Specialised Hospital (barberton); Telkom Learning Centre Quarantine Site; Tembisa Hospital; Thabamooop Psychiatric Hosp; Thabazimbi Hospital; The Fountain Private Hospital; Thebe Hospital; Thelle Mogoerane Regional Hospital; Themba Hospital; Thulasizwe Hospital; Thusanong Hospital; Tintswalo Hospital; Tokollo Hospital; Tonga Hospital; Tower Psychiatric Hospital; Town Hill Hospital; Tshepo-Themba Private Hospital; Tshepong Hospital; Tshilidzini Hospital; Tshwane District Hospital; Tshwane Rehabilitation Hospital; Tygerberg Hospital; Uct Private Academic Hospital; Uitenhage Hospital; Umlamli Hospital; Umphumulo Hospital; Umtata General Hospital; Uniondale Hospital; Universitas Hospital; Universitas Private Hospital; Universitas Underground Parking Surge Facility; Untunjambili Hospital; Valkenberg Hospital; Van Velden Hospital; Victoria Hospital; Victoria Hospital (alice); Victoria Private Hospital; Vista Clinic; Voortrekker Hospital; Vredenburg Hospital; Vredendal Hospital; Vryburg private hospital; Vryheid Hospital; Warmbaths Hospital; Waterval-boven Hospital; Wentworth Hospital; Wesfleur Hospital; Weskoppies Hospital; West Vaal Hospital; Western Cape Rehabilitation Centre; WF Knobel Hospital; Wilhelm Stahl Hospital; Willowmore Hospital; Wilmed Park Private Hospital; Winburg Hospital; Winterberg Tb Hospital; Witbank Hospital; Witpoort Hospital; Worcester Hospital Wc Woc; Zebediela Hospital; Zithulele hospital; Zoutpansberg Private Hospital; Zuid Afrikaans Hospital.

### **South Korea**

Chonnam National University Hospital, Dong-gu; Keimyung University Dong San Hospital, Daegu; Kyung Pook National University Chilgok Hospital, Daegu; Seoul National University Bundang Hospital, Seoul; Severance Hospital, Seoul.

### **Spain**

Hospital 12 de Octubre, Madrid; Hospital Clinic, Barcelona; Hospital del Mar, Barcelona; Hospital Nuestra Señora de Gracia, Zaragoza; Hospital Puerta de Hierro Majadahonda, Madrid; Hospital Ramon y Cajal, Madrid; Hospital Universitari Sagrat Cor, Barcelona; Hospital Universitari Sant Joan D'Alacant, Alicante; Hospital Universitario de Alava, Araba; Hospital Universitario Dr Negrín, Las Palmas; Hospital Universitario Virgen de Valme, Seville; Hospital Vall d'Hebron, Barcelona; Hospital Verge de la Cinta, Tortosa; La Paz Hospital, Madrid; Reina Sofia University Hospital, Cordoba; Rio Hortega University Hospital, Valladolid; San Pedro de Alcantara Hospital, Cáceres; University Hospital Virgen del Rocío / Institute of Biomedicine of Seville, Seville.

### **Taiwan**

National Taiwan University Hospital, Taipei City.

### **Thailand**

Siriraj Piyamaharajkarun Hospital (SiPH), Bangkok.

### **Turkey**

Marmara University Hospital, Istanbul.

### **Ukraine**

Kharkiv Regional Clinical Infectious Diseases Hospital, Kharkiv; Lugansk State Medical University - Department of Internal Medicine No2, Lugansk.

### **United Arab Emirates**

Cleveland Clinic Abu Dhabi, Abu Dhabi.

## United Kingdom

Aberdeen Royal Infirmary; Abraham Cowley Unit; Adamson Hospital; Addenbrooke's Hospital; Airedale General Hospital; Alder Hey Children's NHS Foundation Trust; Alderney Hospital; Amherst Court; Arrows Park Hospital; Ashworth Hospital; B1 BSMHT HQ; Barnet Hospital; Barnsley Hospital; Basildon University Hospital; Basingstoke and North Hampshire Hospital; Bassetlaw Hospital; Bedford Hospital; Bedford Hospital South Wing; Beech House; Birmingham Children's Hospital; Blackberry Hill Hospital; Blackpool Victoria Hospital; Blandford Community Hospital; Borders General Hospital; Bowmere Hospital; Bradford Royal Infirmary; Bridport Community Hospital; Brighton General Hospital; Bristol Royal Hospital for Children; Bristol Royal Infirmary; Bronglais General Hospital; Broomfield Hospital; Bryn Beryl Hospital; Burton Hospital; Caithness General Hospital; Caludon Centre; Cameron Hospital; Campbeltown Hospital; Castle Hill Hospital; Cefni Hospital; Central Middlesex Hospital; Charing Cross Hospital; Charlton Lane Site; Chelsea & Westminster Hospital; Chesterfield Royal Hospital; Chirk Community Hospital; Cirencester Hospital; City Hospital; Clatterbridge Cancer Centre -Wirral; Cockermouth Hospital; Colchester General Hospital; Colwyn Bay Community Hospital; Community Rehabilitation Team (East); Conquest Hospital; Copeland Unit; Countess of Chester Hospital; County Hospital; Cowal Community Hospital; Croydon University Hospital; CUH at Basildon University Hospital; Cumberland Infirmary; Darent Valley Hospital; Darlington Memorial Hospital; Deeside Community Hospital; Denbigh Community Hospital; Derbyshire Healthcare NHS Foundation Trust; Derriford Hospital; Diana, Princess of Wales Hospital; Dilke Memorial Hospital; Dolgellau & Barmouth District Hospital Site; Doncaster - Tickhill Road Site; Doncaster Royal Infirmary; Dorset County Hospital; Dumfries & Galloway Royal Infirmary; Ealing Hospital; East Surrey Hospital; Eastbourne District General Hospital; Eryri Hospital; Fairfield General Hospital; Fieldhead Hospital; Forest Close; Forest Lodge; Forth Valley Royal Hospital; Frimley Park Hospital; Fulbourn Hospital; Furness General Hospital; George Eliot Hospital - Acute Services; Glangwili Hospital Child Health Section; Glenrothes Hospital; Gloucestershire Royal Hospital; Golden Jubilee National Hospital; Grantham & District Hospital; Great Ormond Street Hospital Central London Site; Grenoside Grange; Hairmyres Hospital; Hammersmith Hospital; Harefield Hospital; Harplands Hospital; Harrogate District Hospital; Hellesdon Hospital; Hereford County Hospital; Hillingdon Hospital; Hinchingsbrooke Hospital; Hollins Park; Holywell Community Hospital; Homerton University Hospital; Huddersfield Royal Infirmary; Hull Royal Infirmary; Ipswich Hospital; ISARIC Global Support Centre; James Paget University Hospital; John Radcliffe Hospital; Kent & Canterbury Hospital; Keswick Hospital; Kettering General Hospital; King's College Hospital (Denmark Hill); King's Mill Hospital; Kings Court 2; Kingston Hospital; Lantern Centre; Leeds General Infirmary; Leicester Royal Infirmary; Leicestershire Partnership NHS Trust Mental Health Services; Leighton Hospital; Lincoln County Hospital; Lincolnshire Community Health Services Unit 11; Lincolnshire Partnership NHS Foundation Trust; Lister Hospital; Liverpool Heart and Chest Hospital NHS Trust HQ; Liverpool Women's Hospital; Livewell Southwest; Llandudno General Hospital Site; Lorn and Islands Hospital; Luton & Dunstable Hospital; Lynfield Mount Hospital; Macclesfield District General Hospital; Manchester Royal Infirmary; Manor Hospital; Medway Maritime Hospital; Michael Carlisle Centre; Midhurst Community Hospital; Milton Keynes Hospital; Mold Community Hospital; Monklands District General Hospital; Moorgreen Hospital; Morriston Hospital; Moseley Hall Hospital; Musgrove Park Hospital; New Cross Hospital; Ninewells Hospital; Noahs Ark Childrens Hospital for Wales; Norfolk & Norwich University Hospital; North Devon District Hospital; North Lincs - Great Oaks Inpatient Unit; North Manchester General Hospital; North Middlesex Hospital; North Tyneside General Hospital; Northampton General Hospital (Acute); Northern General Hospital; Northumbria Specialist Emergency Care Hospital; Northwick Park Hospital; Norwich Community Hospital; Nottingham University Hospitals NHS Trust - City Campus; Nottingham University Hospitals NHS Trust - Queen's Medical Centre Campus; Oxford University (ISARIC4C); Penn Hospital; Penrith Hospital; Peterborough City Hospital; Pilgrim Hospital; Pinderfields General Hospital; Poole General Hospital; Prince Charles Hospital Site; Prince Philip Hospital; Princess Alexandra Hospital; Princess Royal Hospital; Queen Alexandra Hospital; Queen Elizabeth Hospital; Queen Elizabeth The Queen Mother Hospital; Queen Elizabeth University Hospital; Queen's Hospital; Raigmore Hospital; RNI Community Hospital; Robert Jones & Agnes Hunt Orthopaedic Hospital; Rotherham District General Hospital; Rotherham Older People's Mental Health Services; Royal Albert Edward Infirmary; Royal Berkshire Hospital; Royal Blackburn Hospital; Royal Bolton Hospital; Royal Bournemouth General Hospital; Royal Bournemouth Hospital Bcsc; Royal Brompton Hospital; Royal Cornwall Hospital (Treliske); Royal Derby Hospital; Royal Devon & Exeter

Hospital (Wonford); Royal Free Hospital; Royal Gwent Hospital; Royal Hallamshire Hospital; Royal Hampshire County Hospital; Royal Hospital for Sick Children (Edinburgh); Royal Infirmary of Edinburgh at Little France; Royal Lancaster Infirmary; Royal Liverpool University Hospital; Royal Manchester Children's Hospital; Royal Oldham Hospital; Royal Orthopaedic Hospital; Royal Papworth Hospital (Papworth Everard); Royal Preston Hospital; Royal Shrewsbury Hospital; Royal Stoke University Hospital; Royal Surrey County Hospital; Royal Sussex County Hospital; Royal United Hospital; Russells Hall Hospital; Ruthin Community Hospital; Salford Royal; Salisbury District Hospital; Sandwell General Hospital; Scarborough General Hospital; Scunthorpe General Hospital; Sheffield Children's Hospital; Shropshire Community Health NHS Trust HQ; South Tyneside District Hospital; Southampton General Hospital; Southend Hospital; Southern Health & Social Care Trust; Southmead Hospital; Southport & Formby District General Hospital; Springfield University Hospital; St George's Hospital; St George's Hospital (Tooting); St Helier Hospital; St James's University Hospital; St John's Hospital; St Marks Hospital; St Mary's Health Campus; St Mary's Hospital; St Mary's Hospital (HQ); St Michael's Hospital; St Nicholas Hospital (Newcastle Upon Tyne); St Peter's Hospital; St Richard's Hospital; St Thomas' Hospital; Stepping Hill Hospital; Stockdale House; Stoke Mandeville Hospital; Stroud General Hospital; Sunderland Royal Hospital; Tameside General Hospital; Tees, Esk, Wear Valley NHS Trust (Durham); Tewkesbury General Hospital; The Christie; The Great Western Hospital; The James Cook University Hospital; The Longley Centre; The Maidstone Hospital; The Mount; The Queen Elizabeth Hospital; The Royal Glamorgan Hospital; The Royal London Hospital; The Royal Marsden Hospital (London); The Royal Marsden Hospital (Surrey); The Royal Victoria Infirmary; The Tunbridge Wells Hospital; The Walton Centre NHS Foundation Trust; The Whittington Hospital; Torbay Hospital; Trafford General Hospital; Trengweath; Trust Head Office; Trust Headquarters; University College Hospital; University College London Hospitals NHS Foundation Trust HQ; University Hospital Aintree; University Hospital Ayr; University Hospital Coventry; University Hospital Crosshouse; University Hospital Lewisham; University Hospital of North Durham; University Hospital of North Tees; University Hospital of Wales; Urgent Care Centre; Victoria Hospital; Victoria Hospital W'borne; Walton Hospital; Wansbeck Hospital; Warrington Hospital; Warwick Hospital; Watford General Hospital; West Cumberland Hospital; West Middlesex University Hospital; West Suffolk Hospital; Western Community Hospital; Western General Hospital; Westminster Memorial Hospital; Westmorland General Hospital; Weston General Hospital; Wexham Park Hospital; Weymouth Community Hospital; Whiston Hospital; William Harvey Hospital (Ashford); Wishaw General Hospital; Withybush General Hospital; Wonford House; Worcestershire Royal Hospital; Worthing Hospital; Wotton Lawn Hospital; Wrexham Maelor Hospital; Wycombe Hospital; Wythenshawe Hospital; Yeovil District Hospital; York Hospital; Ysbyty Alltwen; Ysbyty Cwm Cynon; Ysbyty Cwm Rhondda; Ysbyty Glan Clwyd; Ysbyty Gwynedd; Ysbyty Penrhos Stanley.

### **United States of America**

Allegheny General Hospital, Pittsburgh; Avera McKennan Hospital & University Health Center, South Dakota; Baylor AllSaints Medical Centre, Fort Worth; Baylor Scott & White Health, Temple; Baylor University Medical Centre, Dallas; Baystate MC, Springfield; Beth Israel Deaconess; Beth Israel Deaconess Medical Center, Boston; Brigham and Women's Hospital, Boston; Brooke Army Medical Centre, San Antonio; Carilion Clinic, Roanoke; Cedars-Sinai MC, Los Angeles; Cleveland Clinic, Weston; Cleveland Clinic Foundation; Cleveland Clinic, Ohio, Ohio, OH; Columbia University, New York; Denver Health MC; Duke University MC; Emory University Healthcare System, Atlanta; Harborview MC; Hartford HealthCare, Hartford; Hennepin County MC; Henry Ford Health System; Houston Methodist Hospital, Texas; INOVA Fairfax Medical Center, Fairfax, Virginia; Intermountain Medical Center; Johns Hopkins, Baltimore; Lancaster General Health, Pennsylvania; Lankenau Institute of Medical Research, Wynnewood; Legacy Emanuel Medical Center, Portland; Maine Health, Portland; Massachusetts General Hospital; Mayo Clinic School of Medicine, Arizona; McLeod Healthcare System, Florence; Medical College of Wisconsin, Wisconsin; Medical University of South Carolina; MedStar Washington Hospital Centre, Washington; Montefiore MC; Montefiore MC North; Montefiore MC Weiler; Mount Sinai Medical Center, Miami, FL; Mt Sinai; National Jewish Health / St Joseph; Nationwide Children's Hospital, Columbus; Northwell Health, New York; Ochsner Clinic Foundation, New Orleans; Ohio State University, Columbus; Ohio State University East; Oklahoma Heart Institute, Oklahoma; Oregon Health & Science University, Portland; Oregon Health and Science University; Perelman School of Medicine at the University of Pennsylvania, Philadelphia; Piedmont Atlanta Hospital, Atlanta, Georgia; Presbyterian Hospital Services, Albuquerque; Providence Saint John's Health Centre, Santa Mon-

ica; Rochester General Hospital, New York; Rush University Medical Center, Chicago; Sentara Norfolk General Hospital, Norfolk; St Christopher's Hospital for Children, Philadelphia; St Vincent; Stanford University, Palo Alto; Stanford University Hospital; Swedish Hospital Cherry Hill; Swedish Hospital First Hill; Temple University Hospital; The Christ Hospital, Ohio; The Heart Hospital Baylor Plano, Plano; Tufts Medical Centre, Boston; UH Cleveland Hospital, Cleveland; University MC (LSU); University of Alabama at Birmingham Hospital, Birmingham; University of Arizona; University of California - San Francisco (UCSF), San Francisco; University of California Davis; University of California Ronald Reagan MC; University of California San Francisco - Fresno, Fresno; University of California SF; University of California SF Fresno; University of Chicago, Chicago; University of Cincinnati, Cincinnati; University of Cincinnati MC; University of Colorado Hospital; University of Florida, Gainesville; University of Florida HSC Shands, Gainesville; University of Iowa, Iowa City; University of Kansas Medical Center, Kansas; University of Kentucky; University of Maryland, Baltimore; University of Michigan MC; University of Michigan Schools of Medicine & Public Health, AnnArbor; University of Mississippi MC; University of Nebraska Medical Center, Omaha; University of Oklahoma Health Sciences Center, Oklahoma; University of Texas HSC Houston; University of Utah, Salt Lake City; University of Utah HSC; University of Virginia MC; University of Washington MC; University of Washington Medical Center - Northwest, Seattle; UPMC; UPMC Mercy; UPMC Shadyside; US NHLBI PETAL Network, Boston; UT Southwestern, Dallas; Vanderbilt University MC; Virginia Commonwealth University; Wake Forest Baptist Health; Washington University in St. Louis, St Louis, Missouri.

**Viet Nam**

Hospital for Tropical Diseases, Ho Chi Minh City.

## Acknowledgements and Funders

This work was made possible by the UK Foreign, Commonwealth and Development Office; Wellcome [215091/Z/18/Z] [205228/Z/16/Z] [220757/Z/20/Z]; Bill & Melinda Gates Foundation [OPP1209135]; UK Medical Research Council Clinical Research Training Fellowship MR/V001671/1; the philanthropic support of the donors to the University of Oxford's COVID-19 Research Response Fund (0009109); CIHR Coronavirus Rapid Research Funding Opportunity OV2170359 and the coordination in Canada by Sunnybrook Research Institute; endorsement of the Irish Critical Care- Clinical Trials Group, co-ordination in Ireland by the Irish Critical Care- Clinical Trials Network at University College Dublin and funding by the Health Research Board of Ireland [CTN-2014-12]; the Rapid European COVID-19 Emergency Response research (RECOVER) [H2020 project 101003589] and European Clinical Research Alliance on Infectious Diseases (ECRAID) [965313]; the COVID clinical management team, AIIMS, Rishikesh, India; the COVID-19 Clinical Management team, Manipal Hospital Whitefield, Bengaluru, India; Cambridge NIHR Biomedical Research Centre; the dedication and hard work of the Groote Schuur Hospital Covid ICU Team; support by the Groote Schuur nursing and University of Cape Town registrar bodies coordinated by the Division of Critical Care at the University of Cape Town; the Liverpool School of Tropical Medicine and the University of Oxford; the dedication and hard work of the Norwegian SARS-CoV-2 study team; the Research Council of Norway grant no 312780, and a philanthropic donation from Vivaldi Invest A/S owned by Jon Stephenson von Tetzchner; Imperial NIHR Biomedical Research Centre; the Comprehensive Local Research Networks (CLRN) of which PJMO is an NIHR Senior Investigator (NIHR201385); Innovative Medicines Initiative Joint Undertaking under Grant Agreement No. 115523 COMBACTE, resources of which are composed of financial contribution from the European Union's Seventh Framework Programme (FP7/2007- 2013) and EFPIA companies, in-kind contribution; the French COVID cohort (NCT04262921) is sponsored by INSERM and is funded by the REACTing (REsearch & ACTION emergING infectious diseases) consortium and by a grant of the French Ministry of Health (PHRC n°20-0424); Stiftungsfonds zur Förderung der Bekämpfung der Tuberkulose und anderer Lungenkrankheiten of the City of Vienna, Project Number: APCOV22BGM; Italian Ministry of Health "Fondi Ricerca corrente-L1P6" to IRCCS Ospedale Sacro Cuore-Don Calabria; Australian Department of Health grant (3273191); Gender Equity Strategic Fund at University of Queensland, Artificial Intelligence for Pandemics (A14PAN) at University of Queensland, the Australian Research Council Centre of Excellence for Engineered Quantum Systems (EQUS, CE170100009), the Prince Charles Hospital Foundation, Australia; grants from Instituto de Salud Carlos III, Ministerio de Ciencia, Spain; Brazil, National Council for Scientific and Technological Development Scholarship number 303953/2018-7; the Firland Foundation, Shoreline, Washington, USA; a grant from foundation Bevordering Onderzoek Franciscus; the South Eastern Norway Health Authority and the Research Council of Norway; Institute for Clinical Research (ICR), National Institutes of Health (NIH) supported by the Ministry of Health Malaysia; and preparedness work conducted by the Short Period Incidence Study of Severe Acute Respiratory Infection.

This work uses data provided by patients and collected by the NHS as part of their care and support #DataSavesLives. The data used for this research were obtained from ISARIC4C. We are extremely grateful to the 2648 frontline NHS clinical and research staff and volunteer medical students who collected these data in challenging circumstances; and the generosity of the patients and their families for their individual contributions in these difficult times. The COVID-19 Clinical Information Network (CO-CIN) data was collated by ISARIC4C Investigators. Data and Material provision was supported by grants from: the National Institute for Health Research (NIHR; award CO-CIN-01), the Medical Research Council (MRC; grant MC\_PC\_19059), and by the NIHR Health Protection Research Unit (HPRU) in Emerging and Zoonotic Infections at University of Liverpool in partnership with Public Health England (PHE), (award 200907), NIHR HPRU in Respiratory Infections at Imperial College London with PHE (award 200927), Liverpool Experimental Cancer Medicine Centre (grant C18616/A25153), NIHR Biomedical Research Centre at Imperial College London (award IS-BRC-1215-20013), and NIHR Clinical Research Network providing infrastructure support. We also acknowledge the support of Jeremy J Farrar and Nahoko Shindo
